# Supplementary material for: Enriched dietary saturated fatty acids induce trained immunity via ceramide production that enhances severity of endotoxemia and clearance of infection
Source: eLife. 2022 Oct 20;11:e76744. doi: 10.7554/eLife.76744 (PMC9642993; doi:10.7554/eLife.76744)
Supplement: Figure 1—figure supplement 1—source data 1. [file elife-76744-fig1-figsupp1-data1.xlsx]

## Sheet: Figure S1 A, B, C, D + STATS
Glucose (mg/dL)	Balb/c mice	8.28.2019		Ketones (urine; mmol/L)	Balb/c mice	8.28.2019		Ketones (blood; mmol/L)	Balb/c mice	11.17.2020
Diet	1 week post-diet change	2 weeks post-diet change		Diet	1 week post-diet change	2 weeks post-diet change		Diet	1 week post-diet change	2 weeks post-diet change
SC	174	167		SC	0	0		SC + Veh	0.6	0.2
SC	171	148		SC	0	0		SC + Veh	0.5	0.6
SC	174	150		SC	0	0		SC + Veh	0.9	0.5
SC	171	151		SC	0	0		SC + Veh	0.7	0.4
SC	166	157		SC	0	0		SC + Veh	1.2	0.6
SC	179	132		SC	0	0		SC + Veh	0.7	0.3
SC	170	162		SC	0	0		SC + Veh	0.8	0.3
SC	187	153		SC	0	0		SC + Veh	1.4	0.3
WD	166	189		WD	0	0		SC + BD	1.1	1
WD	200	183		WD	0	0		SC + BD	0.8	1.2
WD	176	178		WD	0	0		SC + BD	0.8	0.8
WD	181	161		WD	0	0		SC + BD	0.5	1.1
WD	189	190		WD	0	0		SC + BD	0.8	1.4
WD	179	173		WD	0	0		SC + BD	0.6	0.9
WD	148	173		WD	0	0		SC + BD	0.7	1
WD	163	176		WD	0	0		SC + BD	0.5	1
KD	176	148		KD	1.5	1.5		KD	0.8	1
KD	176	141		KD	1.5	1.5		KD	1.4	1.1
KD	194	149		KD	1.5	1.5		KD	0.8	1
KD	141	131		KD	1.5	3		KD	1.7	1.1
KD	163	155		KD	1.5	3		KD	1.2	1.1
KD	157	131		KD	1.5	3		KD	1	1.1
KD	162	140		KD	1.5	3		KD	1.3	1
KD	153	147		KD	1.5	1.5		KD	1.8	1
Glucose (mg/dL)	Balb/c mice	11.19.2020
25 hours post-LPS injections
SC	WD	KD
14	16	24
40	69	12
26	29	27
12	27	27
		10
Table Analyzed	Fig S1A		Table Analyzed	Fig S1A		Table Analyzed	Fig S1B
Column B	SC 2wk		Column D	KD 2wk		Column B	KD 2wk
vs.	vs.		vs.	vs.		vs.	vs.
Column A	SC 1wk		Column C	KD 1wk		Column A	SC 2wk
Mann Whitney test			Mann Whitney test			Mann Whitney test
P value	0.0003		P value	0.0031		P value	0.0002
Exact or approximate P value?	Exact		Exact or approximate P value?	Exact		Exact or approximate P value?	Exact
P value summary	***		P value summary	**		P value summary	***
Significantly different (P < 0.05)?	Yes		Significantly different (P < 0.05)?	Yes		Significantly different (P < 0.05)?	Yes
One- or two-tailed P value?	Two-tailed		One- or two-tailed P value?	Two-tailed		One- or two-tailed P value?	Two-tailed
Sum of ranks in column A,B	99 , 37		Sum of ranks in column C,D	94.50 , 41.50		Sum of ranks in column A,B	36 , 100
Mann-Whitney U	1		Mann-Whitney U	5.5		Mann-Whitney U	0
Table Analyzed	Fig S1C		Table Analyzed	Fig S1C		Table Analyzed	Fig S1C
Column C	KD 1wk		Column F	KD 2wk		Column E	SC + BD 2wk
vs.	vs.		vs.	vs.		vs.	vs.
Column A	SC + Veh 1wk		Column D	SC + Veh 2wk		Column D	SC + Veh 2wk
Mann Whitney test			Mann Whitney test			Mann Whitney test
P value	0.0333		P value	0.0002		P value	0.0002
Exact or approximate P value?	Exact		Exact or approximate P value?	Exact		Exact or approximate P value?	Exact
P value summary	*		P value summary	***		P value summary	***
Significantly different (P < 0.05)?	Yes		Significantly different (P < 0.05)?	Yes		Significantly different (P < 0.05)?	Yes
One- or two-tailed P value?	Two-tailed		One- or two-tailed P value?	Two-tailed		One- or two-tailed P value?	Two-tailed
Sum of ranks in column A,C	48 , 88		Sum of ranks in column D,F	36 , 100		Sum of ranks in column D,E	36 , 100
Mann-Whitney U	12		Mann-Whitney U	0		Mann-Whitney U	0
Table Analyzed	Fig S1A
Column B	WD 2wk
vs.	vs.
Column A	SC 2wk
Mann Whitney test
P value	0.0005
Exact or approximate P value?	Exact
P value summary	***
Significantly different (P < 0.05)?	Yes
One- or two-tailed P value?	Two-tailed
Sum of ranks in column A,B	38 , 98
Mann-Whitney U	2

## Sheet: Figure S1 E 2 - 6h + STATS
Endotoxemia BD 11.17.2020
M#	Diet	LPS (mg/kg)	Weight (g) 0h	Temp (℃) 0h	Weight (g) 2h	Temp (℃) 2h	Weight (g) 4h	Temp (℃) 4h	Weight (g) 6h	Temp (℃) 6h
1	SC+Veh	10	26.6	35.5	26.22	33.2	25.91	34.5	25.21	33.2
2	SC+Veh	10	22.78	36.2	22.37	34.1	22.2	36.6	21.64	35.6
3	SC+Veh	10	27.31	35.6	27.01	33.9	26.86	36.3	26.26	35.9
4	SC+Veh	10	22.91	36	22.85	33.9	22.58	34.9	21.86	36.6
5	SC+Veh	10	20.5	36.3	20.26	34.3	19.97	35.1	19.55	33.8
6	SC+BD	10	21.08	36.5	20.11	35	19.69	35.6	19.48	33.7
7	SC+BD	10	22.48	36.2	22.2	32.9	21.87	35.5	21.37	34.5
8	SC+BD	10	21.12	36.8	21.04	33.8	20.51	35.4	19.92	33.1
9	SC+BD	10	20.6	37.1	20.23	34.6	19.89	36.1	19.56	36
10	SC+BD	10	21.95	36.9	21.71	34.3	21.26	33.9	20.79	31.2
11	KD	10	20.69	36.7	19.88	35.1	19.64	34.7	19.21	34.3
12	KD	10	24.91	36.5	24.1	34.5	23.86	34	23.5	33.5
13	KD	10	21.01	36.3	20.21	34	19.91	33.8	19.52	31.2
14	KD	10	22.31	36.3	21.74	33.1	21.43	32.9	20.87	29
15	KD	10	24.61	36	24.09	34.2	23.84	34.5	23.21	34.3
Delta Temp (℃) M#	Diet	Temp (℃) 0h	Temp (℃) 2h	Temp (℃) 4h	Temp (℃) 6h
1	SC+Veh	0	-2.3	-1	-2.3
2	SC+Veh	0	-2.1	0.4	-0.6
3	SC+Veh	0	-1.7	0.7	0.3
4	SC+Veh	0	-2.1	-1.1	0.6
5	SC+Veh	0	-2	-1.2	-2.5
6	SC+BD	0	-1.5	-0.9	-2.8
7	SC+BD	0	-3.3	-0.7	-1.7
8	SC+BD	0	-3	-1.4	-3.7
9	SC+BD	0	-2.5	-1	-1.1
10	SC+BD	0	-2.6	-3	-5.7
11	KD	0	-1.6	-2	-2.4
12	KD	0	-2	-2.5	-3
13	KD	0	-2.3	-2.5	-5.1
14	KD	0	-3.2	-3.4	-7.3
15	KD	0	-1.8	-1.5	-1.7
Column F	4h KD
vs.	vs.
Column D	4h Veh
Mann Whitney test
P value	0.0079
Exact or approximate P value?	Exact
P value summary	**
Significantly different (P < 0.05)?	Yes
One- or two-tailed P value?	Two-tailed
Sum of ranks in column D,F	40 , 15
Mann-Whitney U	0
Column I	6h KD
vs.	vs.
Column G	6h Veh
Mann Whitney test
P value	0.0556
Exact or approximate P value?	Exact
P value summary	ns
Significantly different (P < 0.05)?	No
One- or two-tailed P value?	Two-tailed
Sum of ranks in column G,I	37 , 18
Mann-Whitney U	3
Column C	8h KD
vs.	vs.
Column A	8h Veh
Mann Whitney test
P value	0.0317
Exact or approximate P value?	Exact
P value summary	*
Significantly different (P < 0.05)?	Yes
One- or two-tailed P value?	Two-tailed
Sum of ranks in column A,C	38 , 17
Mann-Whitney U	2
Column E	10h BHB
vs.	vs.
Column D	10h Veh
Mann Whitney test
P value	0.0317
Exact or approximate P value?	Exact
P value summary	*
Significantly different (P < 0.05)?	Yes
One- or two-tailed P value?	Two-tailed
Sum of ranks in column D,E	38 , 17
Mann-Whitney U	2
Column F	10h KD
vs.	vs.
Column D	10h Veh
Mann Whitney test
P value	0.0079
Exact or approximate P value?	Exact
P value summary	**
Significantly different (P < 0.05)?	Yes
One- or two-tailed P value?	Two-tailed
Sum of ranks in column D,F	40 , 15
Mann-Whitney U	0
Column I	12h KD
vs.	vs.
Column G	12h Veh
Mann Whitney test
P value	0.0079
Exact or approximate P value?	Exact
P value summary	**
Significantly different (P < 0.05)?	Yes
One- or two-tailed P value?	Two-tailed
Sum of ranks in column G,I	40 , 15
Mann-Whitney U	0
Column C	14h KD
vs.	vs.
Column A	14h Veh
Mann Whitney test
P value	0.0079
Exact or approximate P value?	Exact
P value summary	**
Significantly different (P < 0.05)?	Yes
One- or two-tailed P value?	Two-tailed
Sum of ranks in column A,C	40 , 15
Mann-Whitney U	0
Column F	16h KD
vs.	vs.
Column D	16h Veh
Mann Whitney test
P value	0.0179
Exact or approximate P value?	Exact
P value summary	*
Significantly different (P < 0.05)?	Yes
One- or two-tailed P value?	Two-tailed
Sum of ranks in column D,F	30 , 6
Mann-Whitney U	0
Column I	18h KD
vs.	vs.
Column G	18h Veh
Mann Whitney test
P value	0.0079
Exact or approximate P value?	Exact
P value summary	**
Significantly different (P < 0.05)?	Yes
One- or two-tailed P value?	Two-tailed
Sum of ranks in column G,I	40 , 15
Mann-Whitney U	0
Column G	20h KD
vs.	vs.
Column A	20h Veh
Mann Whitney test
P value	0.0179
Exact or approximate P value?	Exact
P value summary	*
Significantly different (P < 0.05)?	Yes
One- or two-tailed P value?	Two-tailed
Sum of ranks in column A,G	30 , 6
Mann-Whitney U	0
Column H	22h KD
vs.	vs.
Column B	22h Veh
Mann Whitney test
P value	0.0357
Exact or approximate P value?	Exact
P value summary	*
Significantly different (P < 0.05)?	Yes
One- or two-tailed P value?	Two-tailed
Sum of ranks in column B,H	30 , 6
Mann-Whitney U	0
Column E	22h BHB
vs.	vs.
Column B	22h Veh
Mann Whitney test
P value	0.0317
Exact or approximate P value?	Exact
P value summary	*
Significantly different (P < 0.05)?	Yes
One- or two-tailed P value?	Two-tailed
Sum of ranks in column B,E	38 , 17
Mann-Whitney U	2
Column G	26h KD
vs.	vs.
Column A	26h Veh
Mann Whitney test
P value	0.0357
Exact or approximate P value?	Exact
P value summary	*
Significantly different (P < 0.05)?	Yes
One- or two-tailed P value?	Two-tailed
Sum of ranks in column A,G	30 , 6
Mann-Whitney U	0
Column D	26h BHB
vs.	vs.
Column A	26h Veh
Mann Whitney test
P value	0.0317
Exact or approximate P value?	Exact
P value summary	*
Significantly different (P < 0.05)?	Yes
One- or two-tailed P value?	Two-tailed
Sum of ranks in column A,D	38 , 17
Mann-Whitney U	2
Column E	28h BHB
vs.	vs.
Column B	28h Veh
Mann Whitney test
P value	0.0079
Exact or approximate P value?	Exact
P value summary	**
Significantly different (P < 0.05)?	Yes
One- or two-tailed P value?	Two-tailed
Sum of ranks in column B,E	40 , 15
Mann-Whitney U	0
Column H	28h KD
vs.	vs.
Column B	28h Veh
Mann Whitney test
P value	0.0357
Exact or approximate P value?	Exact
P value summary	*
Significantly different (P < 0.05)?	Yes
One- or two-tailed P value?	Two-tailed
Sum of ranks in column B,H	30 , 6
Mann-Whitney U	0
Column F	30h BHB
vs.	vs.
Column C	30h Veh
Mann Whitney test
P value	0.0079
Exact or approximate P value?	Exact
P value summary	**
Significantly different (P < 0.05)?	Yes
One- or two-tailed P value?	Two-tailed
Sum of ranks in column C,F	40 , 15
Mann-Whitney U	0
Column G	32h BHB
vs.	vs.
Column A	32h Veh
Mann Whitney test
P value	0.0159
Exact or approximate P value?	Exact
P value summary	*
Significantly different (P < 0.05)?	Yes
One- or two-tailed P value?	Two-tailed
Sum of ranks in column A,G	39 , 16
Mann-Whitney U	1
Column H	34h BHB
vs.	vs.
Column B	34h Veh
Mann Whitney test
P value	0.0238
Exact or approximate P value?	Exact
P value summary	*
Significantly different (P < 0.05)?	Yes
One- or two-tailed P value?	Two-tailed
Sum of ranks in column B,H	38 , 17
Mann-Whitney U	2

## Sheet: Figure S1 E 8-12h
M#	Diet	LPS (mg/kg)	Weight (g) 0h	Temp (℃) 0h	Weight (g) 8h	Temp (℃) 8h	Weight (g) 10h	Temp (℃) 10h	Weight (g) 12h	Temp (℃) 12h
1	SC+Veh	10	26.6	35.5	25.11	33.2	24.93	32.8	24.81	32.5
2	SC+Veh	10	22.78	36.2	21.51	34.5	21.42	34.9	21.27	34.4
3	SC+Veh	10	27.31	35.6	26.2	34.5	25.85	34.9	25.85	34.6
4	SC+Veh	10	22.91	36	21.76	35.3	21.64	34.6	21.61	34.6
5	SC+Veh	10	20.5	36.3	19.46	33.4	19.22	35.3	19.21	33.9
6	SC+BD	10	21.08	36.5	19.46	29.9	19.17	32.9	19.12	32.5
7	SC+BD	10	22.48	36.2	21.21	35.4	21.24	33.7	21.19	34.6
8	SC+BD	10	21.12	36.8	19.93	31.5	19.61	32.1	19.56	30.9
9	SC+BD	10	20.6	37.1	19.54	35.8	19.38	35.3	19.22	35.7
10	SC+BD	10	21.95	36.9	20.81	28.2	20.69	29	20.62	29.9
11	KD	10	20.69	36.7	19.07	34.1	18.74	33.1	18.71	33.5
12	KD	10	24.91	36.5	23.28	31.9	23.01	28.8	22.94	29.5
13	KD	10	21.01	36.3	19.41	29.3	19.24	27.2	19.17	25.9
14	KD	10	22.31	36.3	20.76	30.6	20.61	27.8	20.43	25.2
15	KD	10	24.61	36	23.17	33.5	22.99	31.2	22.85	31.4
Delta Temp (℃) M#	Diet	Temp (℃) 0h	Temp (℃) 8h	Temp (℃) 10h	Temp (℃) 12h
1	SC+Veh	0	-2.3	-2.7	-3
2	SC+Veh	0	-1.7	-1.3	-1.8
3	SC+Veh	0	-1.1	-0.7	-1
4	SC+Veh	0	-0.7	-1.4	-1.4
5	SC+Veh	0	-2.9	-1	-2.4
6	SC+BD	0	-6.6	-3.6	-4
7	SC+BD	0	-0.8	-2.5	-1.6
8	SC+BD	0	-5.3	-4.7	-5.9
9	SC+BD	0	-1.3	-1.8	-1.4
10	SC+BD	0	-8.7	-7.9	-7
11	KD	0	-2.6	-3.6	-3.2
12	KD	0	-4.6	-7.7	-7
13	KD	0	-7	-9.1	-10.4
14	KD	0	-5.7	-8.5	-11.1
15	KD	0	-2.5	-4.8	-4.6

## Sheet: Figure S1 E 14-18h
M#	Diet	LPS (mg/kg)	Weight (g) 0h	Temp (℃) 0h	Weight (g) 14h	Temp (℃) 14h	Weight (g) 16h	Temp (℃) 16h	Weight (g) 18h	Temp (℃) 18h
1	SC+Veh	10	26.6	35.5	24.91	33.6	24.61	34.2	24.57	35.2
2	SC+Veh	10	22.78	36.2	21.24	34.6	21.12	34.9	21	35.5
3	SC+Veh	10	27.31	35.6	25.77	35.8	25.67	36.1	25.47	35.6
4	SC+Veh	10	22.91	36	21.72	36.1	21.44	36.2	21.44	35.8
5	SC+Veh	10	20.5	36.3	19.1	34.6	19.07	35	18.96	35.6
6	SC+BD	10	21.08	36.5	18.9	33.5	18.86	33.5	18.85	35.2
7	SC+BD	10	22.48	36.2	21.13	35.2	21.04	35.4	20.99	36.7
8	SC+BD	10	21.12	36.8	19.48	30.5	19.33	30.3	19.48	33.7
9	SC+BD	10	20.6	37.1	19.04	35.9	19.01	36	18.99	36.5
10	SC+BD	10	21.95	36.9	20.33	27	20.3	27.5	20.16	30.7
11	KD	10	20.69	36.7	18.43	33.7	18.31	33.7	18.36	34.1
12	KD	10	24.91	36.5	22.65	29.2	22.6	27.9	22.51	28.4
13	KD	10	21.01	36.3	19.01	27.3	18.91	26.1	x	x
14	KD	10	22.31	36.3	20.31	24.7	20.29	23.2	x	x
15	KD	10	24.61	36	22.65	29.8	22.54	29.6	22.47	31.1
Delta Temp (℃) M#	Diet	Temp (℃) 0h	Temp (℃) 14h	Temp (℃) 16h	Temp (℃) 18h
1	SC+Veh	0	-1.9	-1.3	-0.3		x = death
2	SC+Veh	0	-1.6	-1.3	-0.7
3	SC+Veh	0	0.2	0.5	0
4	SC+Veh	0	0.1	0.2	-0.2
5	SC+Veh	0	-1.7	-1.3	-0.7
6	SC+BD	0	-3	-3	-1.3
7	SC+BD	0	-1	-0.8	0.5
8	SC+BD	0	-6.3	-6.5	-3.1
9	SC+BD	0	-1.2	-1.1	-0.6
10	SC+BD	0	-9.9	-9.4	-6.2
11	KD	0	-3	-3	-2.6
12	KD	0	-7.3	-8.6	-8.1
13	KD	0	-9	-10.2
14	KD	0	-11.6	-13.1
15	KD	0	-6.2	-6.4	-4.9

## Sheet: Figure S1 E 20-24h
M#	Diet	LPS (mg/kg)	Weight (g) 0h	Temp (℃) 0h	Weight (g) 20h	Temp (℃) 20h	Weight (g) 22h	Temp (℃) 22h	Weight (g) 24h	Temp (℃) 24h
1	SC+Veh	10	26.6	35.5	24.73	34.6	24.57	34.7	24.53	35.4
2	SC+Veh	10	22.78	36.2	20.92	36.6	20.84	36.3	21.02	36.3
3	SC+Veh	10	27.31	35.6	25.42	35.9	25.15	36.6	25.14	35.5
4	SC+Veh	10	22.91	36	21.19	37.7	21.17	36.3	21.27	35.6
5	SC+Veh	10	20.5	36.3	18.88	36.6	19	37	18.91	36.8
6	SC+BD	10	21.08	36.5	18.81	36.1	18.73	35.8	18.61	36.5
7	SC+BD	10	22.48	36.2	20.87	37	20.73	35.7	20.6	35.9
8	SC+BD	10	21.12	36.8	19.44	31.9	19.34	31.6	19.28	34
9	SC+BD	10	20.6	37.1	18.88	36.2	18.81	35.8	18.77	35.9
10	SC+BD	10	21.95	36.9	20.11	30.9	20.05	26	19.91	31.2
11	KD	10	20.69	36.7	18.15	35.4	18.09	35.2	17.97	35
12	KD	10	24.91	36.5	22.37	29.4	22.29	23.4	22.1	24.9
13	KD	10	21.01	36.3	x	x	x	x	x	x
14	KD	10	22.31	36.3	x	x	x	x	x	x
15	KD	10	24.61	36	22.35	31.5	22.17	32.9	22.23	34
Delta Temp (℃) M#	Diet	Temp (℃) 0h	Temp (℃) 20h	Temp (℃) 22h	Temp (℃) 24h
1	SC+Veh	0	-0.9	-0.8	-0.1		x = death
2	SC+Veh	0	0.4	0.1	0.1
3	SC+Veh	0	0.3	1	-0.1
4	SC+Veh	0	1.7	0.3	-0.4
5	SC+Veh	0	0.3	0.7	0.5
6	SC+BD	0	-0.4	-0.7	0
7	SC+BD	0	0.8	-0.5	-0.3
8	SC+BD	0	-4.9	-5.2	-2.8
9	SC+BD	0	-0.9	-1.3	-1.2
10	SC+BD	0	-6	-10.9	-5.7
11	KD	0	-1.3	-1.5	-1.7
12	KD	0	-7.1	-13.1	-11.6
13	KD	0
14	KD	0
15	KD	0	-4.5	-3.1	-2

## Sheet: Figure S1 E 26 - 30h
M#	Diet	LPS (mg/kg)	Weight (g) 0h	Temp (℃) 0h	Weight (g) 26h	Temp (℃) 26h	Weight (g) 28h	Temp (℃) 28h	Weight (g) 30h	Temp (℃) 30h
1	SC+Veh	10	26.6	35.5	24.48	36.2	24.38	36.1	24.32	35.5
2	SC+Veh	10	22.78	36.2	20.65	36.5	20.86	36.1	20.84	36.4
3	SC+Veh	10	27.31	35.6	24.91	35.1	24.82	34.9	24.64	35.7
4	SC+Veh	10	22.91	36	21.08	35.9	21.08	36.2	21.06	36.3
5	SC+Veh	10	20.5	36.3	18.72	36	18.69	35.7	18.67	35.9
6	SC+BD	10	21.08	36.5	18.66	35.5	18.54	35.4	18.47	35.4
7	SC+BD	10	22.48	36.2	20.45	36	20.41	35.4	20.29	35.6
8	SC+BD	10	21.12	36.8	19.14	34.9	19.13	34.7	18.99	35.2
9	SC+BD	10	20.6	37.1	18.39	35.6	18.4	35.4	18.27	35.6
10	SC+BD	10	21.95	36.9	19.81	25.1	19.84	30.9	19.76	22.9
11	KD	10	20.69	36.7	18.02	34.7	18.13	35.3	17.89	35
12	KD	10	24.91	36.5	21.99	23.9	21.88	23.3	x	x
13	KD	10	21.01	36.3	x	x	x	x	x	x
14	KD	10	22.31	36.3	x	x	x	x	x	x
15	KD	10	24.61	36	22.14	34.6	22.04	34.6	21.77	34.7
Delta Temp (℃) M#	Diet	Temp (℃) 0h	Temp (℃) 26h	Temp (℃) 28h	Temp (℃) 30h
1	SC+Veh	0	0.7	0.6	0		x = death
2	SC+Veh	0	0.3	-0.1	0.2
3	SC+Veh	0	-0.5	-0.7	0.1
4	SC+Veh	0	-0.1	0.2	0.3
5	SC+Veh	0	-0.3	-0.6	-0.4
6	SC+BD	0	-1	-1.1	-1.1
7	SC+BD	0	-0.2	-0.8	-0.6
8	SC+BD	0	-1.9	-2.1	-1.6
9	SC+BD	0	-1.5	-1.7	-1.5
10	SC+BD	0	-11.8	-6	-14
11	KD	0	-2	-1.4	-1.7
12	KD	0	-12.6	-13.2
13	KD	0
14	KD	0
15	KD	0	-1.4	-1.4	-1.3

## Sheet: Figure S1 E 32 - 36h
M#	Diet	LPS (mg/kg)	Weight (g) 0h	Temp (℃) 0h	Weight (g) 32h	Temp (℃) 32h	Weight (g) 34h	Temp (℃) 34h	Weight (g) 36h	Temp (℃) 36h
1	SC+Veh	10	26.6	35.5	24.2	36.2	24.23	35.8	23.86	35.8
2	SC+Veh	10	22.78	36.2	21.08	36.6	20.74	35.7	20.79	36
3	SC+Veh	10	27.31	35.6	24.27	36.3	24.47	35.1	24.33	34.9
4	SC+Veh	10	22.91	36	20.65	36.5	20.74	35.8	20.69	35.7
5	SC+Veh	10	20.5	36.3	18.59	35.9	18.58	35.2	18.45	35.4
6	SC+BD	10	21.08	36.5	18.33	35	18.05	35.9	18.02	34.6
7	SC+BD	10	22.48	36.2	20.19	35.9	20.05	35.6	20.38	36.4
8	SC+BD	10	21.12	36.8	18.83	35	18.79	35.3	18.62	35.2
9	SC+BD	10	20.6	37.1	18.17	35.8	18.21	35	18.11	35.3
10	SC+BD	10	21.95	36.9	19.68	26.9	19.61	22.3	19.53	22.1
11	KD	10	20.69	36.7	17.6	35.1	17.95	35.11	17.76	34.6
12	KD	10	24.91	36.5	x	x	x	x	x	x
13	KD	10	21.01	36.3	x	x	x	x	x	x
14	KD	10	22.31	36.3	x	x	x	x	x	x
15	KD	10	24.61	36	21.72	34.5	21.79	34.2	21.6	35.7
Delta Temp (℃) M#	Diet	Temp (℃) 0h	Temp (℃) 32h	Temp (℃) 34h	Temp (℃) 36h
1	SC+Veh	0	0.7	0.3	0.3		x = death
2	SC+Veh	0	0.4	-0.5	-0.2
3	SC+Veh	0	0.7	-0.5	-0.7
4	SC+Veh	0	0.5	-0.2	-0.3
5	SC+Veh	0	-0.4	-1.1	-0.9
6	SC+BD	0	-1.5	-0.6	-1.9
7	SC+BD	0	-0.3	-0.6	0.2
8	SC+BD	0	-1.8	-1.5	-1.6
9	SC+BD	0	-1.3	-2.1	-1.8
10	SC+BD	0	-10	-14.6	-14.8
11	KD	0	-1.6	-1.59	-2.1
12	KD	0
13	KD	0
14	KD	0
15	KD	0	-1.5	-1.8	-0.3

## Sheet: Figure S1 E 38 - 40h
M#	Diet	LPS (mg/kg)	Weight (g) 0h	Temp (℃) 0h	Weight (g) 38h	Temp (℃) 38h	Weight (g) 40h	Temp (℃) 40h
1	SC+Veh	10	26.6	35.5	23.81	35.2	23.81	34.8
2	SC+Veh	10	22.78	36.2	20.78	35.9	20.74	35
3	SC+Veh	10	27.31	35.6	24.33	35.2	24.4	35.3
4	SC+Veh	10	22.91	36	20.55	34.9	20.51	35.4
5	SC+Veh	10	20.5	36.3	18.28	34.8	18.22	33.1
6	SC+BD	10	21.08	36.5	17.76	34.2	17.78	34.3
7	SC+BD	10	22.48	36.2	20.27	35	20.22	35.1
8	SC+BD	10	21.12	36.8	18.52	36	18.41	35.9
9	SC+BD	10	20.6	37.1	18.17	35	18.08	34.9
10	SC+BD	10	21.95	36.9	x	x	x	x
11	KD	10	20.69	36.7	17.64	34.7	17.66	35.7
12	KD	10	24.91	36.5	x	x	x	x
13	KD	10	21.01	36.3	x	x	x	x
14	KD	10	22.31	36.3	x	x	x	x
15	KD	10	24.61	36	21.36	34.4	21.3	34.6
Delta Temp (℃) M#	Diet	Temp (℃) 0h	Temp (℃) 38h	Temp (℃) 40h
1	SC+Veh	0	-0.3	-0.7		x = death
2	SC+Veh	0	-0.3	-1.2
3	SC+Veh	0	-0.4	-0.3
4	SC+Veh	0	-1.1	-0.6
5	SC+Veh	0	-1.5	-3.2
6	SC+BD	0	-2.3	-2.2
7	SC+BD	0	-1.2	-1.1
8	SC+BD	0	-0.8	-0.9
9	SC+BD	0	-2.1	-2.2
10	SC+BD	0
11	KD	0	-2	-1
12	KD	0
13	KD	0
14	KD	0
15	KD	0	-1.6	-1.4

## Sheet: Figure S1 E 42 - 48h
M#	Diet	LPS (mg/kg)	Weight (g) 0h	Temp (℃) 0h	Weight (g) 42h	Temp (℃) 42h	Weight (g) 44h	Temp (℃) 44h	Weight (g) 46h	Temp (℃) 46h	Weight (g) 48h	Temp (℃) 48h
1	SC+Veh	10	26.6	35.5	23.76	35	23.74	35.3	23.76	35	23.76	31.9
2	SC+Veh	10	22.78	36.2	20.82	34.7	20.82	35.5	20.86	35.5	20.76	35.2
3	SC+Veh	10	27.31	35.6	24.41	34	24.34	34.1	24.34	34.9	24.24	34
4	SC+Veh	10	22.91	36	20.65	35.6	20.59	34.3	20.57	33.3	20.49	34
5	SC+Veh	10	20.5	36.3	18.06	35.9	18.03	34.4	17.9	35.4	17.97	35
6	SC+BD	10	21.08	36.5	17.99	36.1	18.06	36.2	17.85	35.8	17.88	35.6
7	SC+BD	10	22.48	36.2	20.33	35.8	20.41	35.5	20.14	35.9	20.12	35
8	SC+BD	10	21.12	36.8	18.25	34.6	18.17	34.7	18.11	35.5	18.09	34.8
9	SC+BD	10	20.6	37.1	18.02	31.8	17.91	34.6	17.86	35.8	18.06	35.9
10	SC+BD	10	21.95	36.9	x	x	x	x	x	x	x	x
11	KD	10	20.69	36.7	17.63	35.3	17.53	35.3	17.5	34.5	17.49	35.1
12	KD	10	24.91	36.5	x	x	x	x	x	x	x	x
13	KD	10	21.01	36.3	x	x	x	x	x	x	x	x
14	KD	10	22.31	36.3	x	x	x	x	x	x	x	x
15	KD	10	24.61	36	21.02	34.5	20.82	34.3	20.95	34.4	20.99	34.7
Delta Temp (℃) M#	Diet	Temp (℃) 0h	Temp (℃) 42h	Temp (℃) 44h	Temp (℃) 46h	Temp (℃) 48h
1	SC+Veh	0	-0.5	-0.2	-0.5	-3.6		x = death
2	SC+Veh	0	-1.5	-0.7	-0.7	-1
3	SC+Veh	0	-1.6	-1.5	-0.7	-1.6
4	SC+Veh	0	-0.4	-1.7	-2.7	-2
5	SC+Veh	0	-0.4	-1.9	-0.9	-1.3
6	SC+BD	0	-0.4	-0.3	-0.7	-0.9
7	SC+BD	0	-0.4	-0.7	-0.3	-1.2
8	SC+BD	0	-2.2	-2.1	-1.3	-2
9	SC+BD	0	-5.3	-2.5	-1.3	-1.2
10	SC+BD	0
11	KD	0	-1.4	-1.4	-2.2	-1.6
12	KD	0
13	KD	0
14	KD	0
15	KD	0	-1.5	-1.7	-1.6	-1.3

## Sheet: Figure S1 E 50 - 60h
M#	Diet	Diet	LPS (mg/kg)	Weight (g) 0h	Temp (℃) 0h	Weight (g) 50h	Temp (℃) 50h
1	SC+Veh	7d	10	26.6	35.5	23.56	32.9
2	SC+Veh	7d	10	22.78	36.2	20.61	35.8
3	SC+Veh	7d	10	27.31	35.6	24.31	34.9
4	SC+Veh	7d	10	22.91	36	20.39	36
5	SC+Veh	7d	10	20.5	36.3	18.01	35.4
6	SC+BD	7d	10	21.08	36.5	17.84	36
7	SC+BD	7d	10	22.48	36.2	20.13	35.1
8	SC+BD	7d	10	21.12	36.8	18.05	35
9	SC+BD	7d	10	20.6	37.1	17.91	35.7
10	SC+BD	7d	10	21.95	36.9	x	x
11	KD	14d	10	20.69	36.7	17.46	35.1
12	KD	14d	10	24.91	36.5	x	x
13	KD	14d	10	21.01	36.3	x	x
14	KD	14d	10	22.31	36.3	x	x
15	KD	14d	10	24.61	36	21.01	34.7
Delta Temp (℃) M#	Diet	LPS	Temp (℃) 0h	Temp (℃) 50h
1	SC+Veh	7d	0	-2.6		x = death
2	SC+Veh	7d	0	-0.4
3	SC+Veh	7d	0	-0.7
4	SC+Veh	7d	0	0
5	SC+Veh	7d	0	-0.9
6	SC+BD	7d	0	-0.5
7	SC+BD	7d	0	-1.1
8	SC+BD	7d	0	-1.8
9	SC+BD	7d	0	-1.4
10	SC+BD	7d	0
11	KD	14d	0	-1.6
12	KD	14d	0
13	KD	14d	0
14	KD	14d	0
15	KD	14d	0	-1.3

[truncated: 6 more sheets: Figure S1 F + STATS, Figure S1G 0 - 6h+STATS, Figure S1 G 8 - 14h, Figure S1 G 16 - 22h, Figure S1 G 24 - 30h, Figure S1 H + STATS]
