# Supplementary material for: Enriched dietary saturated fatty acids induce trained immunity via ceramide production that enhances severity of endotoxemia and clearance of infection
Source: eLife. 2022 Oct 20;11:e76744. doi: 10.7554/eLife.76744 (PMC9642993; doi:10.7554/eLife.76744)
Supplement: Figure 1—source data 1. [file elife-76744-fig1-data1.xlsx]

## Sheet: Figure 1A 0-10h + STATS
Endotoxemia 6mg/kg LPS	Balb/c	8.28.2019
Temp (℃) M#	Diet	LPS (mg/kg)	0h	2h	4h	6h	8h	10h
1	SC	(PBS)	36.9	34.6	35.2	36.5	37	36.5
2	SC	(PBS)	37.3	34.3	35.9	36.5	37.5	37.3
3	SC	(PBS)	36.2	35.7	36.1	36.1	37	37
4	SC	6	36.1	33.9	34.3	33.5	33.2	31.7
5	SC	6	37	35	34.3	33.7	34	33.1
6	SC	6	35.5	33.1	33.2	33	32	33.3
7	SC	6	35	34.4	33.7	33.4	32.6	32
8	SC	6	35	34.1	34.2	31.4	31.5	32.2
9	WD	(PBS)	35.6	36	36	37.3	37.4	37.6
10	WD	(PBS)	36.1	36.4	36.3	37.1	36.8	37.3
11	WD	(PBS)	41.9	41.9	42	42.4	42.9	42.9
12	WD	6	34.9	32.8	33.5	33.4	31.7	28.4
13	WD	6	35.2	33.5	34.8	33.1	32.5	29.8
14	WD	6	36.2	34.4	36.2	32.6	32.6	28.6
15	WD	6	38.6	37.4	35.6	33.9	32.8	29.9
16	WD	6	37.4	35.7	37.5	35.1	34.6	31.1
17	KD	(PBS)	no chip	no chip	no chip	no chip	no chip	no chip
18	KD	(PBS)	36.8	36.3	37.1	37.6	37.5	37.3
19	KD	(PBS)	36.2	35.9	36.4	36.9	36.5	37
20	KD	6	36.4	34	33.7	32.3	31.5	28.9
21	KD	6	36.9	34.3	32.5	31.1	30.4	25.7
22	KD	6	37	35	35	34.4	32.7	29.3
23	KD	6	36.9	33.7	34.7	32.3	32.5	28.1
24	KD	6	36.6	34.4	34.1	33	31.9	28.6
Delta Temp (℃) M#	Diet	LPS	0h	2h	4h	6h	8h	10h
1	SC	(PBS)	0	-2.3	-1.7	-0.4	0.1	-0.4
2	SC	(PBS)	0	-3	-1.4	-0.8	0.2	0
3	SC	(PBS)	0	-0.5	-0.1	-0.1	0.8	0.8
4	SC	6	0	-2.2	-1.8	-2.6	-2.9	-4.4
5	SC	6	0	-2	-2.7	-3.3	-3	-3.9
6	SC	6	0	-2.4	-2.3	-2.5	-3.5	-2.2
7	SC	6	0	-0.6	-1.3	-1.6	-2.4	-3
8	SC	6	0	-0.9	-0.8	-3.6	-3.5	-2.8
9	WD	(PBS)	0	0.4	0.4	1.7	1.8	2
10	WD	(PBS)	0	0.3	0.2	1	0.7	1.2
11	WD	(PBS)	0	0	0.1	0.5	1	1
12	WD	6	0	-2.1	-1.4	-1.5	-3.2	-6.5
13	WD	6	0	-1.7	-0.4	-2.1	-2.7	-5.4
14	WD	6	0	-1.8	0	-3.6	-3.6	-7.6
15	WD	6	0	-1.2	-3	-4.7	-5.8	-8.7
16	WD	6	0	-1.7	0.1	-2.3	-2.8	-6.3
17	KD	(PBS)	0
18	KD	(PBS)	0	-0.5	0.3	0.8	0.7	0.5
19	KD	(PBS)	0	-0.3	0.2	0.7	0.3	0.8
20	KD	6	0	-2.4	-2.7	-4.1	-4.9	-7.5
21	KD	6	0	-2.6	-4.4	-5.8	-6.5	-11.2
22	KD	6	0	-2	-2	-2.6	-4.3	-7.7
23	KD	6	0	-3.2	-2.2	-4.6	-4.4	-8.8
24	KD	6	0	-2.2	-2.5	-3.6	-4.7	-8
Mann-Whitney U Tests
Column B	WD 10h
vs.	vs.
Column A	SC 10h
Mann Whitney test
P value	0.0079
Exact or approximate P value?	Exact
P value summary	**
Significantly different (P < 0.05)?	Yes
One- or two-tailed P value?	Two-tailed
Sum of ranks in column A,B	40 , 15
Mann-Whitney U	0
Column C	KD 10h
vs.	vs.
Column A	SC 10h
Mann Whitney test
P value	0.0079
Exact or approximate P value?	Exact
P value summary	**
Significantly different (P < 0.05)?	Yes
One- or two-tailed P value?	Two-tailed
Sum of ranks in column A,C	40 , 15
Mann-Whitney U	0
Column E	WD 12h
vs.	vs.
Column D	SC 12h
Mann Whitney test
P value	0.0079
Exact or approximate P value?	Exact
P value summary	**
Significantly different (P < 0.05)?	Yes
One- or two-tailed P value?	Two-tailed
Sum of ranks in column D,E	40 , 15
Mann-Whitney U	0
Column F	KD 12h
vs.	vs.
Column D	SC 12h
Mann Whitney test
P value	0.0079
Exact or approximate P value?	Exact
P value summary	**
Significantly different (P < 0.05)?	Yes
One- or two-tailed P value?	Two-tailed
Sum of ranks in column D,F	40 , 15
Mann-Whitney U	0
Column H	WD 14h
vs.	vs.
Column G	SC 14h
Mann Whitney test
P value	0.0079
Exact or approximate P value?	Exact
P value summary	**
Significantly different (P < 0.05)?	Yes
One- or two-tailed P value?	Two-tailed
Sum of ranks in column G,H	40 , 15
Mann-Whitney U	0
Column I	KD 14h
vs.	vs.
Column G	SC 14h
Mann Whitney test
P value	0.0079
Exact or approximate P value?	Exact
P value summary	**
Significantly different (P < 0.05)?	Yes
One- or two-tailed P value?	Two-tailed
Sum of ranks in column G,I	40 , 15
Mann-Whitney U	0
Column K	WD 16h
vs.	vs.
Column J	SC 16h
Mann Whitney test
P value	0.0079
Exact or approximate P value?	Exact
P value summary	**
Significantly different (P < 0.05)?	Yes
One- or two-tailed P value?	Two-tailed
Sum of ranks in column J,K	40 , 15
Mann-Whitney U	0
Column L	KD 16h
vs.	vs.
Column J	SC 16h
Mann Whitney test
P value	0.0079
Exact or approximate P value?	Exact
P value summary	**
Significantly different (P < 0.05)?	Yes
One- or two-tailed P value?	Two-tailed
Sum of ranks in column J,L	40 , 15
Mann-Whitney U	0
Column N	WD 18h
vs.	vs.
Column M	SC 18h
Mann Whitney test
P value	0.0079
Exact or approximate P value?	Exact
P value summary	**
Significantly different (P < 0.05)?	Yes
One- or two-tailed P value?	Two-tailed
Sum of ranks in column M,N	40 , 15
Mann-Whitney U	0
Column O	KD 18h
vs.	vs.
Column M	SC 18h
Mann Whitney test
P value	0.0079
Exact or approximate P value?	Exact
P value summary	**
Significantly different (P < 0.05)?	Yes
One- or two-tailed P value?	Two-tailed
Sum of ranks in column M,O	40 , 15
Mann-Whitney U	0
Column Q	WD 20h
vs.	vs.
Column P	SC 20h
Mann Whitney test
P value	0.0079
Exact or approximate P value?	Exact
P value summary	**
Significantly different (P < 0.05)?	Yes
One- or two-tailed P value?	Two-tailed
Sum of ranks in column P,Q	40 , 15
Mann-Whitney U	0
Column R	KD 20h
vs.	vs.
Column P	SC 20h
Mann Whitney test
P value	0.0079
Exact or approximate P value?	Exact
P value summary	**
Significantly different (P < 0.05)?	Yes
One- or two-tailed P value?	Two-tailed
Sum of ranks in column P,R	40 , 15
Mann-Whitney U	0
Column B	SC 22h
vs.	vs.
Column A	KD 22h
Mann Whitney test
P value	0.0159
Exact or approximate P value?	Exact
P value summary	*
Significantly different (P < 0.05)?	Yes
One- or two-tailed P value?	Two-tailed
Sum of ranks in column A,B	10 , 35
Mann-Whitney U	0

## Sheet: Figure 1A 12h-22h
Temp (℃) M#	Diet	LPS (mg/kg)	12h	14h	16h	18h	20h	22h
1	SC	(PBS)	37.1	36.9	35.7	34.4	36.7	36.9
2	SC	(PBS)	36.8	37.2	36	35.3	37.4	36.7
3	SC	(PBS)	36.6	35.8	35.8	35	35.9	36.3
4	SC	6	33.6	33.6	34.5	34.1	35.1	35.4
5	SC	6	33	34.6	35.1	35.9	36	35.7
6	SC	6	31.8	33.3	33.8	34.9	35	35.4
7	SC	6	32.4	33.2	33.9	34.6	35	34.6
8	SC	6	32.9	33.8	35.3	34.8	35.9	36.5
9	WD	(PBS)	37.7	36	35.9	36.3	37.4	37.5
10	WD	(PBS)	36.3	36.2	36.5	35.6	37	36.9
11	WD	(PBS)	43	41.7	41.5	41.3	43	42.6
12	WD	6	27.1	25.7	22.8	22.4	23.6	deceased
13	WD	6	28.1	25.8	23.9	23.2	24.2	deceased
14	WD	6	25.8	22.9	23.2	22	23.2	32
15	WD	6	30	28	25.3	24.9	26.2	deceased
16	WD	6	29.6	27.6	24.3	23.5	24.5	deceased
17	KD	(PBS)	no chip	no chip	no chip	no chip	no chip	no chip
18	KD	(PBS)	37	36.6	36.2	37.4	36	37.1
19	KD	(PBS)	36	36.1	35.7	36.4	36.2	36.2
20	KD	6	28.3	27	24.3	24.1	24.2	24.5
21	KD	6	24.6	25.3	22.8	21.9	23.1	23.9
22	KD	6	27.8	26.8	23.1	22.9	22.9	21.8
23	KD	6	26.6	25.3	22.1	21.7	22.2	deceased
24	KD	6	27.6	26.1	23.1	22.4	22.7	23.2
Delta Temp (℃) M#	Diet	LPS	12h	14h	16h	18h	20h	22h
1	SC	(PBS)	0.2	0	-1.2	-2.5	-0.2	0
2	SC	(PBS)	-0.5	-0.1	-1.3	-2	0.1	-0.6
3	SC	(PBS)	0.4	-0.4	-0.4	-1.2	-0.3	0.1
4	SC	6	-2.5	-2.5	-1.6	-2	-1	-0.7
5	SC	6	-4	-2.4	-1.9	-1.1	-1	-1.3
6	SC	6	-3.7	-2.2	-1.7	-0.6	-0.5	-0.1
7	SC	6	-2.6	-1.8	-1.1	-0.4	0	-0.4
8	SC	6	-2.1	-1.2	0.3	-0.2	0.9	1.5
9	WD	(PBS)	2.1	0.4	0.3	0.7	1.8	1.9
10	WD	(PBS)	0.2	0.1	0.4	-0.5	0.9	0.8
11	WD	(PBS)	1.1	-0.2	-0.4	-0.6	1.1	0.7
12	WD	6	-7.8	-9.2	-12.1	-12.5	-11.3
13	WD	6	-7.1	-9.4	-11.3	-12	-11
14	WD	6	-10.4	-13.3	-13	-14.2	-13	-4.2
15	WD	6	-8.6	-10.6	-13.3	-13.7	-12.4
16	WD	6	-7.8	-9.8	-13.1	-13.9	-12.9
17	KD	(PBS)	no chip	no chip	no chip	no chip	no chip	no chip
18	KD	(PBS)	0.2	-0.2	-0.6	0.6	-0.8	0.3
19	KD	(PBS)	-0.2	-0.1	-0.5	0.2	0	0
20	KD	6	-8.1	-9.4	-12.1	-12.3	-12.2	-11.9
21	KD	6	-12.3	-11.6	-14.1	-15	-13.8	-13
22	KD	6	-9.2	-10.2	-13.9	-14.1	-14.1	-15.2
23	KD	6	-10.3	-11.6	-14.8	-15.2	-14.7
24	KD	6	-9	-10.5	-13.5	-14.2	-13.9	-13.4

## Sheet: Figure 1A 24h-34h
Temp (℃) M#	Diet	LPS (mg/kg)	24h	26h	28h	30h	32h	34h
1	SC	(PBS)	36.6	36.3	35.6	35	36.8	36.2
2	SC	(PBS)	36.3	36.7	36.1	35.7	36.9	36.7
3	SC	(PBS)	36.1	36.3	35.5	35.2	36.4	35.8
4	SC	6	35.5	34.9	35.6	35.6	35.4	35.3
5	SC	6	35.9	36.1	35.9	36.4	36	35.6
6	SC	6	35.7	35.5	35.7	35.3	35.1	34.9
7	SC	6	34.8	34.9	35.5	35.2	35.8	35
8	SC	6	36.1	36	35.8	36.4	36.6	36.2
9	WD	(PBS)	37	36.1	36.4	36.2	37.5	37.1
10	WD	(PBS)	36.9	35.6	36.2	36.3	36.4	36.8
11	WD	(PBS)	42.3	40.7	42	42	41.5	41.6
12	WD	6	x	x	x	x	x	x
13	WD	6	x	x	x	x	x	x
14	WD	6	deceased	x	x	x	x	x
15	WD	6	x	x	x	x	x	x
16	WD	6	x	x	x	x	x	x
17	KD	(PBS)	no chip	no chip	no chip	no chip	no chip	no chip
18	KD	(PBS)	36.8	35.9	36.3	35.8	36.1	36.5
19	KD	(PBS)	36.4	35.6	35.6	36.3	36.1	35.8
20	KD	6	22.7	deceased	x	x	x	x
21	KD	6	deceased	x	x	x	x	x
22	KD	6	deceased	x	x	x	x	x
23	KD	6	x	x	x	x	x	x
24	KD	6	21.7	deceased	x	x	x	x
Delta Temp (℃) M#	Diet	LPS	24h	26h	28h	30h	32h	34h
1	SC	(PBS)	-0.3	-0.6	-1.3	-1.9	-0.1	-0.7
2	SC	(PBS)	-1	-0.6	-1.2	-1.6	-0.4	-0.6
3	SC	(PBS)	-0.1	0.1	-0.7	-1	0.2	-0.4
4	SC	6	-0.6	-1.2	-0.5	-0.5	-0.7	-0.8
5	SC	6	-1.1	-0.9	-1.1	-0.6	-1	-1.4
6	SC	6	0.2	0	0.2	-0.2	-0.4	-0.6
7	SC	6	-0.2	-0.1	0.5	0.2	0.8	0
8	SC	6	1.1	1	0.8	1.4	1.6	1.2
9	WD	(PBS)	1.4	0.5	0.8	0.6	1.9	1.5
10	WD	(PBS)	0.8	-0.5	0.1	0.2	0.3	0.7
11	WD	(PBS)	0.4	-1.2	0.1	0.1	-0.4	-0.3
12	WD	6
13	WD	6
14	WD	6
15	WD	6
16	WD	6
17	KD	(PBS)
18	KD	(PBS)	0	-0.9	-0.5	-1	-0.7	-0.3
19	KD	(PBS)	0.2	-0.6	-0.6	0.1	-0.1	-0.4
20	KD	6	-13.7
21	KD	6
22	KD	6
23	KD	6
24	KD	6	-14.9

## Sheet: Figure 1A 36h-46h
Temp (℃) M#	Diet	LPS (mg/kg)	36h	41h	43h	45h	47h
1	SC	(PBS)	37.4	35.8	35.4	36.5	35.3
2	SC	(PBS)	37.4	36.3	35.9	36.2	35.2
3	SC	(PBS)	36.9	36.5	35.7	35.6	34.6
4	SC	6	35.5	33.9	34.4	34.9	34.5
5	SC	6	35.7	35.6	35.5	35.8	35.5
6	SC	6	35.2	31.6	30.8	34.1	35.3
7	SC	6	35.7	34.2	35	35.1	35.8
8	SC	6	36.2	35.6	36.2	35.5	36.2
9	WD	(PBS)	37.6	36	37	36	stopped rec
10	WD	(PBS)	36.4	36	36	35.8	stopped rec
11	WD	(PBS)	42.6	41.6	42.8	41.7	stopped rec
12	WD	6	x	x	x	x	x
13	WD	6	x	x	x	x	x
14	WD	6	x	x	x	x	x
15	WD	6	x	x	x	x	x
16	WD	6	x	x	x	x	x
17	KD	(PBS)	no chip	no chip	no chip	no chip	no chip
18	KD	(PBS)	37.5	35.9	37.1	36.2	stopped rec
19	KD	(PBS)	36.5	35.7	36	35.8	stopped rec
20	KD	6	x	x	x	x	x
21	KD	6	x	x	x	x	x
22	KD	6	x	x	x	x	x
23	KD	6	x	x	x	x	x
24	KD	6	x	x	x	x	x
Delta Temp (℃) M#	Diet	LPS	36h	41h	43h	45h	47h
1	SC	(PBS)	0.5	-1.1	-1.5	-0.4	-1.6
2	SC	(PBS)	0.1	-1	-1.4	-1.1	-2.1
3	SC	(PBS)	0.7	0.3	-0.5	-0.6	-1.6
4	SC	6	-0.6	-2.2	-1.7	-1.2	-1.6
5	SC	6	-1.3	-1.4	-1.5	-1.2	-1.5
6	SC	6	-0.3	-3.9	-4.7	-1.4	-0.2
7	SC	6	0.7	-0.8	0	0.1	0.8
8	SC	6	1.2	0.6	1.2	0.5	1.2
9	WD	(PBS)	2	0.4	1.4	0.4
10	WD	(PBS)	0.3	-0.1	-0.1	-0.3
11	WD	(PBS)	0.7	-0.3	0.9	-0.2
12	WD	6
13	WD	6
14	WD	6
15	WD	6
16	WD	6
17	KD	(PBS)
18	KD	(PBS)	0.7	-0.9	0.3	-0.6
19	KD	(PBS)	0.3	-0.5	-0.2	-0.4
20	KD	6
21	KD	6
22	KD	6
23	KD	6
24	KD	6

## Sheet: Figure 1A 48h-70h
Temp (℃) M#	Diet	LPS (mg/kg)	49h
1	SC	(PBS)	36.4
2	SC	(PBS)	36.2
3	SC	(PBS)	36.1
4	SC	6	35.5
5	SC	6	35.2
6	SC	6	35.5
7	SC	6	35.2
8	SC	6	35.9
9	WD	(PBS)	x
10	WD	(PBS)	x
11	WD	(PBS)	x
12	WD	6	x
13	WD	6	x
14	WD	6	x
15	WD	6	x
16	WD	6	x
17	KD	(PBS)	x
18	KD	(PBS)	x
19	KD	(PBS)	x
20	KD	6	x
21	KD	6	x
22	KD	6	x
23	KD	6	x
24	KD	6	x
Delta Temp (℃) M#	Diet	LPS	49h
1	SC	(PBS)	-0.5
2	SC	(PBS)	-1.1
3	SC	(PBS)	-0.1
4	SC	6	-0.6
5	SC	6	-1.8
6	SC	6	0
7	SC	6	0.2
8	SC	6	0.9
9	WD	(PBS)
10	WD	(PBS)
11	WD	(PBS)
12	WD	6
13	WD	6
14	WD	6
15	WD	6
16	WD	6
17	KD	(PBS)
18	KD	(PBS)
19	KD	(PBS)
20	KD	6
21	KD	6
22	KD	6
23	KD	6
24	KD	6

## Sheet: Figure 1B + STATS
Survival (Prism), Balb/c mice, 6mg/kg LPS, 8.28.2019					Comparison of Survival Curves
Time (h)	SC	WD	Keto
22		1			Log-rank (Mantel-Cox) test (recommended)
22		1			Chi square	17.45
22		1			df	2
22		1			P value	0.0002
24		1			P value summary	***
24			1		Are the survival curves sig different?	Yes
24			1
24			1
26			1
26			1
200	0
200	0
200	0
200	0
200	0

## Sheet: Figure 1C, D, F, G (1) + STATS
	Well	Fluor	Target	Content	Sample	Cq	SQ
	A01	SYBR	B-actin	Unkn	M3 SC	30.0886			Balb/c Endotoxemia 8.28.19		Normalizer
	A02	SYBR	B-actin	Unkn	M6 SC	29.8446			Time post-LPS	Mouse # / Diet	Actin	TNFalpha	△Ct	△△Ct	RQ
	A03	SYBR	B-actin	Unkn	M7 SC	29.6735			0h	M3 SC	30.0886	ND			0
	A04	SYBR	B-actin	Unkn	M8 SC	30.1387			0h	M6 SC	29.8446	ND			0
	A09	SYBR	B-actin	Unkn	M5 SC	25.5229			0h	M7 SC	29.6735	ND			0
	B01	SYBR	B-actin	Unkn	M18 WD	30.3717			0h	M8 SC	30.1387	ND			0
	B02	SYBR	B-actin	Unkn	M21 WD	30.2303			0h	M5 SC	25.5229	35.2376	9.71476	-2.28524	4.87447
	B03	SYBR	B-actin	Unkn	M22 WD	31.927			0h	M18 WD	30.3717	37.1209	6.74918	-5.25082	38.0764
	B04	SYBR	B-actin	Unkn	M23 WD	29.2184			0h	M21 WD	30.2303	38.0521	7.82184	-4.17816	18.103
	B05	SYBR	B-actin	Unkn	M26 KD	30.107			0h	M22 WD	31.927	37.7845	5.85752	-6.14248	70.6432
	B06	SYBR	B-actin	Unkn	M29 KD	30.9998			0h	M23 WD	29.2184	38.0658	8.8474	-3.1526	8.89258
	B07	SYBR	B-actin	Unkn	M30 KD	31.7599			0h	M26 KD	30.107	37.8089	7.70184	-4.29816	19.6731
	B08	SYBR	B-actin	Unkn	M31 KD	29.505			0h	M29 KD	30.9998	37.9765	6.97674	-5.02326	32.5201
	B09	SYBR	B-actin	Unkn	M20 WD	27.0636			0h	M30 KD	31.7599	ND			0
	B10	SYBR	B-actin	Unkn	M28 KD	26.5302			0h	M31 KD	29.505	37.4155	7.91058	-4.08942	17.0231
	C01	SYBR	TNF-a	Unkn	M3 SC	ND			0h	M20 WD	27.0636	35.0779	8.01429	-3.98571	15.8423
	C02	SYBR	TNF-a	Unkn	M6 SC	ND			0h	M28 KD	26.5302	34.0021	7.47185	-4.52815	23.0733
	C03	SYBR	TNF-a	Unkn	M7 SC	ND
	C04	SYBR	TNF-a	Unkn	M8 SC	ND				Calibrator	12
	C09	SYBR	TNF-a	Unkn	M5 SC	35.2376
	D01	SYBR	TNF-a	Unkn	M18 WD	37.1209					Normalizer
	D02	SYBR	TNF-a	Unkn	M21 WD	38.0521			Time post-LPS	Mouse # / Diet	Actin	IL-6	△Ct	△△Ct	RQ
	D03	SYBR	TNF-a	Unkn	M22 WD	37.7845			0h	M3 SC	30.0886	ND			0
	D04	SYBR	TNF-a	Unkn	M23 WD	38.0658			0h	M6 SC	29.8446	ND			0
	D05	SYBR	TNF-a	Unkn	M26 KD	37.8089			0h	M7 SC	29.6735	ND			0
	D06	SYBR	TNF-a	Unkn	M29 KD	37.9765			0h	M8 SC	30.1387	37.5748	7.43613	-4.56387	23.6517
	D07	SYBR	TNF-a	Unkn	M30 KD	ND			0h	M5 SC	25.5229	ND			0
	D08	SYBR	TNF-a	Unkn	M31 KD	37.4155			0h	M18 WD	30.3717	ND			0
	D09	SYBR	TNF-a	Unkn	M20 WD	35.0779			0h	M21 WD	30.2303	37.6134	7.38312	-4.61688	24.5369
	D10	SYBR	TNF-a	Unkn	M28 KD	34.0021			0h	M22 WD	31.927	ND			0
	E01	SYBR	IL-6	Unkn	M3 SC	ND			0h	M23 WD	29.2184	37.4924	8.27397	-3.72603	13.2327
	E02	SYBR	IL-6	Unkn	M6 SC	ND			0h	M26 KD	30.107	34.9047	4.7977	-7.2023	147.268
	E03	SYBR	IL-6	Unkn	M7 SC	ND			0h	M29 KD	30.9998	38.0522	7.05249	-4.94751	30.8567
	E04	SYBR	IL-6	Unkn	M8 SC	37.5748			0h	M30 KD	31.7599	ND			0
	E09	SYBR	IL-6	Unkn	M5 SC	ND			0h	M31 KD	29.505	ND			0
	F01	SYBR	IL-6	Unkn	M18 WD	ND			0h	M20 WD	27.0636	34.4566	7.39296	-4.60704	24.37
	F02	SYBR	IL-6	Unkn	M21 WD	37.6134			0h	M28 KD	26.5302	34.4583	7.92813	-4.07187	16.8173
	F03	SYBR	IL-6	Unkn	M22 WD	ND
	F04	SYBR	IL-6	Unkn	M23 WD	37.4924			Table Analyzed	Fig 1C
	F05	SYBR	IL-6	Unkn	M26 KD	34.9047
	F06	SYBR	IL-6	Unkn	M29 KD	38.0522			Column B	WD 5h			All IL-10 samples RQ = 0
	F07	SYBR	IL-6	Unkn	M30 KD	ND			vs.	vs.
	F08	SYBR	IL-6	Unkn	M31 KD	ND			Column A	SC 5h
	F09	SYBR	IL-6	Unkn	M20 WD	34.4566
	F10	SYBR	IL-6	Unkn	M28 KD	34.4583			Mann Whitney test
	G01	SYBR	IL-10	Unkn	M3 SC	ND			P value	0.0079
	G02	SYBR	IL-10	Unkn	M6 SC	ND			Exact or approximate P value?	Exact
	G03	SYBR	IL-10	Unkn	M7 SC	ND			P value summary	**
	G04	SYBR	IL-10	Unkn	M8 SC	ND			Significantly different (P < 0.05)?	Yes
	G05	SYBR	IL-10	Unkn	M33 SC	ND			One- or two-tailed P value?	Two-tailed
	G09	SYBR	IL-10	Unkn	M5 SC	ND			Sum of ranks in column A,B	15 , 40
	H01	SYBR	IL-10	Unkn	M18 WD	ND			Mann-Whitney U	0
	H02	SYBR	IL-10	Unkn	M21 WD	ND
	H03	SYBR	IL-10	Unkn	M22 WD	ND			Table Analyzed	Fig 1C
	H04	SYBR	IL-10	Unkn	M23 WD	ND
	H05	SYBR	IL-10	Unkn	M26 KD	ND			Column C	KD 5h
	H06	SYBR	IL-10	Unkn	M29 KD	ND			vs.	vs.
	H07	SYBR	IL-10	Unkn	M30 KD	ND			Column A	SC 5h
	H08	SYBR	IL-10	Unkn	M31 KD	ND
	H09	SYBR	IL-10	Unkn	M20 WD	ND			Mann Whitney test
	H10	SYBR	IL-10	Unkn	M28 KD	ND			P value	0.0159
									Exact or approximate P value?	Exact
									P value summary	*
									Significantly different (P < 0.05)?	Yes
									One- or two-tailed P value?	Two-tailed
									Sum of ranks in column A,C	16 , 39
									Mann-Whitney U	1
									Table Analyzed	Fig 1C
									Column I	KD 15h
									vs.	vs.
									Column G	SC 15h
									Mann Whitney test
									P value	0.0159
									Exact or approximate P value?	Exact
									P value summary	*
									Significantly different (P < 0.05)?	Yes
									One- or two-tailed P value?	Two-tailed
									Sum of ranks in column G,I	39 , 16
									Mann-Whitney U	1
									Table Analyzed	Fig 1C
									Column K	WD 20h
									vs.	vs.
									Column J	SC 20h
									Mann Whitney test
									P value	0.0079
									Exact or approximate P value?	Exact
									P value summary	**
									Significantly different (P < 0.05)?	Yes
									One- or two-tailed P value?	Two-tailed
									Sum of ranks in column J,K	40 , 15
									Mann-Whitney U	0
									Table Analyzed	Fig 1D
									Column B	WD 5h
									vs.	vs.
									Column A	SC 5h
									Mann Whitney test
									P value	0.0079
									Exact or approximate P value?	Exact
									P value summary	**
									Significantly different (P < 0.05)?	Yes
									One- or two-tailed P value?	Two-tailed
									Sum of ranks in column A,B	15 , 40
									Mann-Whitney U	0
									Table Analyzed	Fig 1D
									Column C	KD 5h
									vs.	vs.
									Column A	SC 5h
									Mann Whitney test
									P value	0.0079
									Exact or approximate P value?	Exact
									P value summary	**
									Significantly different (P < 0.05)?	Yes
									One- or two-tailed P value?	Two-tailed
									Sum of ranks in column A,C	15 , 40
									Mann-Whitney U	0
									Table Analyzed	Fig 1E
									Column B	WD
									vs.	vs.
									Column A	SC
									Mann Whitney test
									P value	0.0635
									Exact or approximate P value?	Exact
									P value summary	ns
									Significantly different (P < 0.05)?	No
									One- or two-tailed P value?	Two-tailed
									Sum of ranks in column A,B	17 , 28
									Mann-Whitney U	2
									Table Analyzed	Fig 1E
									Column C	KD
									vs.	vs.
									Column A	SC
									Mann Whitney test
									P value	0.0079
									Exact or approximate P value?	Exact
									P value summary	**
									Significantly different (P < 0.05)?	Yes
									One- or two-tailed P value?	Two-tailed
									Sum of ranks in column A,C	15 , 40
									Mann-Whitney U	0
									Table Analyzed	Fig 1F
									Column B	WD
									vs.	vs.
									Column A	SC
									Mann Whitney test
									P value	0.0317
									Exact or approximate P value?	Exact
									P value summary	*
									Significantly different (P < 0.05)?	Yes
									One- or two-tailed P value?	Two-tailed
									Sum of ranks in column A,B	17 , 38
									Mann-Whitney U	2
									Table Analyzed	Fig 1F
									Column C	KD
									vs.	vs.
									Column A	SC
									Mann Whitney test
									P value	0.0159
									Exact or approximate P value?	Exact
									P value summary	*
									Significantly different (P < 0.05)?	Yes
									One- or two-tailed P value?	Two-tailed
									Sum of ranks in column A,C	15 , 30
									Mann-Whitney U	0
									Table Analyzed	Fig 1F
									Column C	KD
									vs.	vs.
									Column A	SC
									Mann Whitney test
									P value	0.0079
									Exact or approximate P value?	Exact
									P value summary	**
									Significantly different (P < 0.05)?	Yes
									One- or two-tailed P value?	Two-tailed
									Sum of ranks in column A,C	15 , 40
									Mann-Whitney U	0
									Table Analyzed	Fig1G
									Column B	WD 10h
									vs.	vs.
									Column A	SC 10h
									Mann Whitney test
									P value	0.0317
									Exact or approximate P value?	Exact
									P value summary	*
									Significantly different (P < 0.05)?	Yes
									One- or two-tailed P value?	Two-tailed
									Sum of ranks in column A,B	17 , 38
									Mann-Whitney U	2
									Table Analyzed	Fig1G
									Column C	KD 10h
									vs.	vs.
									Column A	SC 10h
									Mann Whitney test
									P value	0.0159
									Exact or approximate P value?	Exact
									P value summary	*
									Significantly different (P < 0.05)?	Yes
									One- or two-tailed P value?	Two-tailed
									Sum of ranks in column A,C	15 , 30
									Mann-Whitney U	0
									Table Analyzed	Fig1G
									Column E	WD 15h
									vs.	vs.
									Column D	SC 15h
									Mann Whitney test
									P value	0.0159
									Exact or approximate P value?	Exact
									P value summary	*
									Significantly different (P < 0.05)?	Yes
									One- or two-tailed P value?	Two-tailed
									Sum of ranks in column D,E	16 , 39
									Mann-Whitney U	1
									Table Analyzed	Fig1G
									Column F	KD 15h
									vs.	vs.
									Column D	SC 15h
									Mann Whitney test
									P value	0.0079
									Exact or approximate P value?	Exact
									P value summary	**
									Significantly different (P < 0.05)?	Yes
									One- or two-tailed P value?	Two-tailed
									Sum of ranks in column D,F	15 , 40
									Mann-Whitney U	0
									Table Analyzed	Fig1G
									Column H	WD 20h
									vs.	vs.
									Column G	SC 20h
									Mann Whitney test
									P value	0.0317
									Exact or approximate P value?	Exact
									P value summary	*
									Significantly different (P < 0.05)?	Yes
									One- or two-tailed P value?	Two-tailed
									Sum of ranks in column G,H	17 , 38
									Mann-Whitney U	2
									Table Analyzed	Fig1G
									Column I	KD 20h
									vs.	vs.
									Column G	SC 20h
									Mann Whitney test
									P value	0.0079
									Exact or approximate P value?	Exact
									P value summary	**
									Significantly different (P < 0.05)?	Yes
									One- or two-tailed P value?	Two-tailed
									Sum of ranks in column G,I	15 , 40
									Mann-Whitney U	0
									Table Analyzed	Fig 1E
									Column E	KD 15h
									vs.	vs.
									Column A	SC 15h
									Mann Whitney test
									P value	0.0079
									Exact or approximate P value?	Exact
									P value summary	**
									Significantly different (P < 0.05)?	Yes
									One- or two-tailed P value?	Two-tailed
									Sum of ranks in column A,E	40 , 15
									Mann-Whitney U	0
									Table Analyzed	Fig 1E
									Column D	WD 20h
									vs.	vs.
									Column B	SC 20h
									Mann Whitney test
									P value	0.0079
									Exact or approximate P value?	Exact
									P value summary	**
									Significantly different (P < 0.05)?	Yes
									One- or two-tailed P value?	Two-tailed
									Sum of ranks in column B,D	40 , 15
									Mann-Whitney U	0
									Table Analyzed	Fig 1E
									Column F	KD 20h
									vs.	vs.
									Column B	SC 20h
									Mann Whitney test
									P value	0.0079
									Exact or approximate P value?	Exact
									P value summary	**
									Significantly different (P < 0.05)?	Yes
									One- or two-tailed P value?	Two-tailed
									Sum of ranks in column B,F	40 , 15
									Mann-Whitney U	0
									Table Analyzed	Fig 1D
									Column D	1D 15h WD
									vs.	vs.
									Column C	1D 15h SC
									Mann Whitney test
									P value	0.0079
									Exact or approximate P value?	Exact
									P value summary	**
									Significantly different (P < 0.05)?	Yes
									One- or two-tailed P value?	Two-tailed
									Sum of ranks in column C,D	15 , 40
									Mann-Whitney U	0

## Sheet: Figure 1C, D, F, G (2)
	Well	Fluor	Target	Content	Sample	Cq	SQ
	A01	SYBR	B-actin	Unkn	M4 SC	28.9283					Normalizer
	A02	SYBR	B-actin	Unkn	M5 SC	29.2079			Time post-LPS	Mouse # / Diet	Actin	TNFalpha	△Ct	△△Ct	RQ
	A03	SYBR	B-actin	Unkn	M6 SC	29.3362			5h	M4 SC	28.9283	34.2186	5.29039	-6.70961	104.664
	A04	SYBR	B-actin	Unkn	M7 SC	30.1241			5h	M5 SC	29.2079	35.1932	5.98526	-6.01474	64.6572
	A05	SYBR	B-actin	Unkn	M8 SC	32.2207			5h	M6 SC	29.3362	35.2178	5.88158	-6.11842	69.475
	B01	SYBR	B-actin	Unkn	M19 WD	30.5171			5h	M7 SC	30.1241	36.2913	6.16717	-5.83283	56.9978
	B02	SYBR	B-actin	Unkn	M20 WD	30.3258			5h	M8 SC	32.2207	38.3322	6.11149	-5.88851	59.2404
	B03	SYBR	B-actin	Unkn	M21 WD	30.4529			5h	M19 WD	30.5171	34.7012	4.18403	-7.81597	225.342
	B04	SYBR	B-actin	Unkn	M22 WD	30.3876			5h	M20 WD	30.3258	34.5106	4.18477	-7.81523	225.226
	B05	SYBR	B-actin	Unkn	M23 WD	30.7212			5h	M21 WD	30.4529	34.5534	4.10052	-7.89948	238.771
	B06	SYBR	B-actin	Unkn	M27 KD	30.5686			5h	M22 WD	30.3876	34.7162	4.32858	-7.67142	203.858
	B07	SYBR	B-actin	Unkn	M28 KD	29.5718			5h	M23 WD	30.7212	34.5903	3.86905	-8.13095	280.323
	B08	SYBR	B-actin	Unkn	M29 KD	29.9501			5h	M27 KD	30.5686	34.369	3.80043	-8.19957	293.979
	B09	SYBR	B-actin	Unkn	M30 KD	32.6711			5h	M28 KD	29.5718	34.9851	5.41332	-6.58668	96.1145
	B10	SYBR	B-actin	Unkn	M31 KD	32.3228			5h	M29 KD	29.9501	34.05	4.09987	-7.90013	238.878
	C01	SYBR	TNF-a	Unkn	M4 SC	34.2186			5h	M30 KD	32.6711	36.2642	3.59303	-8.40697	339.43
	C02	SYBR	TNF-a	Unkn	M5 SC	35.1932			5h	M31 KD	32.3228	36.6139	4.29102	-7.70898	209.235
	C03	SYBR	TNF-a	Unkn	M6 SC	35.2178
	C04	SYBR	TNF-a	Unkn	M7 SC	36.2913				Calibrator	12
	C05	SYBR	TNF-a	Unkn	M8 SC	38.3322
	D01	SYBR	TNF-a	Unkn	M19 WD	34.7012					Normalizer
	D02	SYBR	TNF-a	Unkn	M20 WD	34.5106			Time post-LPS	Mouse # / Diet	Actin	IL-6	△Ct	△△Ct	RQ
	D03	SYBR	TNF-a	Unkn	M21 WD	34.5534			5h	M4 SC	28.9283	33.426	4.4977	-7.5023	181.308
	D04	SYBR	TNF-a	Unkn	M22 WD	34.7162			5h	M5 SC	29.2079	34.6957	5.48778	-6.51222	91.2798
	D05	SYBR	TNF-a	Unkn	M23 WD	34.5903			5h	M6 SC	29.3362	35.0594	5.72321	-6.27679	77.5357
	D06	SYBR	TNF-a	Unkn	M27 KD	34.369			5h	M7 SC	30.1241	34.8698	4.74564	-7.25436	152.679
	D07	SYBR	TNF-a	Unkn	M28 KD	34.9851			5h	M8 SC	32.2207	36.945	4.72429	-7.27571	154.956
	D08	SYBR	TNF-a	Unkn	M29 KD	34.05			5h	M19 WD	30.5171	33.2014	2.68425	-9.31575	637.265
	D09	SYBR	TNF-a	Unkn	M30 KD	36.2642			5h	M20 WD	30.3258	33.9282	3.60239	-8.39761	337.235
	D10	SYBR	TNF-a	Unkn	M31 KD	36.6139			5h	M21 WD	30.4529	33.4779	3.02499	-8.97501	503.207
	E01	SYBR	IL-6	Unkn	M4 SC	33.426			5h	M22 WD	30.3876	34.4631	4.07545	-7.92455	242.956
	E02	SYBR	IL-6	Unkn	M5 SC	34.6957			5h	M23 WD	30.7212	33.7619	3.04068	-8.95932	497.765
	E03	SYBR	IL-6	Unkn	M6 SC	35.0594			5h	M27 KD	30.5686	34.1352	3.56664	-8.43336	345.696
	E04	SYBR	IL-6	Unkn	M7 SC	34.8698			5h	M28 KD	29.5718	33.1496	3.57779	-8.42221	343.034
	E05	SYBR	IL-6	Unkn	M8 SC	36.945			5h	M29 KD	29.9501	32.8143	2.86423	-9.13577	562.524
	F01	SYBR	IL-6	Unkn	M19 WD	33.2014			5h	M30 KD	32.6711	36.301	3.62988	-8.37012	330.87
	F02	SYBR	IL-6	Unkn	M20 WD	33.9282			5h	M31 KD	32.3228	36.4429	4.12006	-7.87994	235.559
	F03	SYBR	IL-6	Unkn	M21 WD	33.4779
	F04	SYBR	IL-6	Unkn	M22 WD	34.4631
	F05	SYBR	IL-6	Unkn	M23 WD	33.7619					Normalizer
	F06	SYBR	IL-6	Unkn	M27 KD	34.1352			Time post-LPS	Mouse # / Diet	Actin	IL-10	△Ct	△△Ct	RQ
	F07	SYBR	IL-6	Unkn	M28 KD	33.1496			5h	M4 SC	28.9283	ND			0
	F08	SYBR	IL-6	Unkn	M29 KD	32.8143			5h	M5 SC	29.2079	ND			0
	F09	SYBR	IL-6	Unkn	M30 KD	36.301			5h	M6 SC	29.3362	37.9567	8.62043	-3.37957	10.4076
	F10	SYBR	IL-6	Unkn	M31 KD	36.4429			5h	M7 SC	30.1241	ND			0
	G01	SYBR	IL-10	Unkn	M4 SC	ND			5h	M8 SC	32.2207	ND			0
	G02	SYBR	IL-10	Unkn	M5 SC	ND			5h	M19 WD	30.5171	37.9294	7.41222	-4.58778	24.047
	G03	SYBR	IL-10	Unkn	M6 SC	37.9567			5h	M20 WD	30.3258	36.8868	6.56097	-5.43903	43.3822
	G04	SYBR	IL-10	Unkn	M7 SC	ND			5h	M21 WD	30.4529	38.6586	8.20572	-3.79428	13.8737
	G05	SYBR	IL-10	Unkn	M8 SC	ND			5h	M22 WD	30.3876	37.8072	7.41955	-4.58045	23.925
	H01	SYBR	IL-10	Unkn	M19 WD	37.9294			5h	M23 WD	30.7212	ND			0
	H02	SYBR	IL-10	Unkn	M20 WD	36.8868			5h	M27 KD	30.5686	ND			0
	H03	SYBR	IL-10	Unkn	M21 WD	38.6586			5h	M28 KD	29.5718	37.9321	8.36029	-3.63971	12.4641
	H04	SYBR	IL-10	Unkn	M22 WD	37.8072			5h	M29 KD	29.9501	ND			0
	H05	SYBR	IL-10	Unkn	M23 WD	ND			5h	M30 KD	32.6711	ND			0
	H06	SYBR	IL-10	Unkn	M27 KD	ND			5h	M31 KD	32.3228	ND			0
	H07	SYBR	IL-10	Unkn	M28 KD	37.9321
	H08	SYBR	IL-10	Unkn	M29 KD	ND
	H09	SYBR	IL-10	Unkn	M30 KD	ND
	H10	SYBR	IL-10	Unkn	M31 KD	ND

## Sheet: Figure 1C, D, F, G (3)
	Well	Fluor	Target	Content	Sample	Cq	SQ
	A01	SYBR	B-Actin	Unkn	M4 SC	25.8941					Normalizer
	A02	SYBR	B-Actin	Unkn	M5 SC	24.1668			Time post-LPS	Mouse # / Diet	Actin	TNFalpha	△Ct	△△Ct	RQ
	A03	SYBR	B-Actin	Unkn	M6 SC	25.2534			10h	M4 SC	26.0915	32.0577	5.96618	-6.03382	65.5181
	A04	SYBR	B-Actin	Unkn	M7 SC	26.1981			10h	M5 SC	24.4495	30.0036	5.55412	-6.44588	87.1775
	A05	SYBR	B-Actin	Unkn	M8 SC	25.896			10h	M6 SC	25.7069	31.6835	5.9766	-6.0234	65.0465
	B01	SYBR	B-Actin	Unkn	M19 WD	26.6951			10h	M7 SC	26.7087	32.2191	5.51036	-6.48964	89.8624
	B02	SYBR	B-Actin	Unkn	M20 WD	27.3989			10h	M8 SC	26.2077	32.4971	6.28943	-5.71057	52.3665
	B03	SYBR	B-Actin	Unkn	M21 WD	27.6309			10h	M19 WD	27.1448	33.0805	5.93567	-6.06433	66.9184
	B04	SYBR	B-Actin	Unkn	M22 WD	27.2694			10h	M20 WD	27.6601	33.3258	5.66569	-6.33431	80.6895
	B05	SYBR	B-Actin	Unkn	M23 WD	26.6889			10h	M21 WD	28.173	34.02	5.84702	-6.15298	71.1591
	B07	SYBR	B-Actin	Unkn	M27 KD	26.8811			10h	M22 WD	27.4798	33.464	5.98418	-6.01582	64.7057
	B08	SYBR	B-Actin	Unkn	M28 KD	29.5369			10h	M23 WD	26.656	32.3751	5.71907	-6.28093	77.7583
	B09	SYBR	B-Actin	Unkn	M29 KD	27.5599			10h	M27 KD	27.5594	33.2098	5.65041	-6.34959	81.5485
	B10	SYBR	B-Actin	Unkn	M30 KD	27.8996			10h	M28 KD	30.0465	34.9579	4.91137	-7.08863	136.11
	B11	SYBR	B-Actin	Unkn	M31 KD	28.5706			10h	M29 KD	27.811	33.5345	5.72356	-6.27644	77.5169
	E01	SYBR	IL-6	Unkn	M4 SC	34.3299			10h	M30 KD	28.398	34.1071	5.70912	-6.29088	78.2966
	E02	SYBR	IL-6	Unkn	M5 SC	33.5014			10h	M31 KD	29.0508	35.1475	6.09667	-5.90333	59.852
	E03	SYBR	IL-6	Unkn	M6 SC	34.7907
	E04	SYBR	IL-6	Unkn	M7 SC	35.7105
	E05	SYBR	IL-6	Unkn	M8 SC	35.1144				Calibrator	12
	F01	SYBR	IL-6	Unkn	M19 WD	34.2331
	F02	SYBR	IL-6	Unkn	M20 WD	36.1108					Normalizer
	F03	SYBR	IL-6	Unkn	M21 WD	34.4371			Time post-LPS	Mouse # / Diet	Actin	IL-6	△Ct	△△Ct	RQ
	F04	SYBR	IL-6	Unkn	M22 WD	36.5479			10h	M4 SC	25.8941	34.3299	8.43585	-3.56415	11.8281
	F05	SYBR	IL-6	Unkn	M23 WD	33.8875			10h	M5 SC	24.1668	33.5014	9.33457	-2.66543	6.34418
	F07	SYBR	IL-6	Unkn	M27 KD	36.5479			10h	M6 SC	25.2534	34.7907	9.53727	-2.46273	5.51259
	F08	SYBR	IL-6	Unkn	M28 KD	35.1426			10h	M7 SC	26.1981	35.7105	9.5124	-2.4876	5.60845
	F09	SYBR	IL-6	Unkn	M29 KD	34.101			10h	M8 SC	25.896	35.1144	9.21836	-2.78164	6.87632
	F10	SYBR	IL-6	Unkn	M30 KD	37.124			10h	M19 WD	26.6951	34.2331	7.53803	-4.46197	22.0387
	F11	SYBR	IL-6	Unkn	M31 KD	36.3943			10h	M20 WD	27.3989	36.1108	8.71187	-3.28813	9.76847
	G01	SYBR	IL-10	Unkn	M4 SC	34.4705			10h	M21 WD	27.6309	34.4371	6.80614	-5.19386	36.6021
	G02	SYBR	IL-10	Unkn	M5 SC	32.6057			10h	M22 WD	27.2694	36.5479	9.27857	-2.72143	6.59525
	G03	SYBR	IL-10	Unkn	M6 SC	34.2295			10h	M23 WD	26.6889	33.8875	7.19857	-4.80143	27.8852
	G04	SYBR	IL-10	Unkn	M7 SC	34.9532			10h	M27 KD	26.8811	36.5479	9.66678	-2.33322	5.03928
	G05	SYBR	IL-10	Unkn	M8 SC	35.4892			10h	M28 KD	29.5369	35.1426	5.60572	-6.39428	84.1141
	H01	SYBR	IL-10	Unkn	M19 WD	34.5103			10h	M29 KD	27.5599	34.101	6.54116	-5.45884	43.9819
	H02	SYBR	IL-10	Unkn	M20 WD	34.5182			10h	M30 KD	27.8996	37.124	9.22441	-2.77559	6.84757
	H03	SYBR	IL-10	Unkn	M21 WD	35.0856			10h	M31 KD	28.5706	36.3943	7.8237	-4.1763	18.0797
	H04	SYBR	IL-10	Unkn	M22 WD	34.6511
	H05	SYBR	IL-10	Unkn	M23 WD	35.3583
	H06	SYBR	IL-10	Unkn	M18 WD	34.0942					Normalizer
	H07	SYBR	IL-10	Unkn	M27 KD	ND			Time post-LPS	Mouse # / Diet	Actin	IL-10	△Ct	△△Ct	RQ
	H08	SYBR	IL-10	Unkn	M28 KD	35.7178			10h	M4 SC	25.8941	34.4705	8.57644	-3.42356	10.7298
	H09	SYBR	IL-10	Unkn	M29 KD	34.5297			10h	M5 SC	24.1668	32.6057	8.43883	-3.56117	11.8037
	H10	SYBR	IL-10	Unkn	M30 KD	35.1753			10h	M6 SC	25.2534	34.2295	8.9761	-3.0239	8.13363
	H11	SYBR	IL-10	Unkn	M31 KD	35.5654			10h	M7 SC	26.1981	34.9532	8.75507	-3.24493	9.48029
									10h	M8 SC	25.896	35.4892	9.59317	-2.40683	5.30307
									10h	M19 WD	26.6951	34.5103	7.81525	-4.18475	18.1859
	A01	SYBR	B-Actin	Unkn	M4 SC	26.0915			10h	M20 WD	27.3989	34.5182	7.11927	-4.88073	29.4609
	A02	SYBR	B-Actin	Unkn	M5 SC	24.4495			10h	M21 WD	27.6309	35.0856	7.45473	-4.54527	23.3488
	A03	SYBR	B-Actin	Unkn	M6 SC	25.7069			10h	M22 WD	27.2694	34.6511	7.38171	-4.61829	24.5608
	A04	SYBR	B-Actin	Unkn	M7 SC	26.7087			10h	M23 WD	26.6889	35.3583	8.66938	-3.33062	10.0604
	A05	SYBR	B-Actin	Unkn	M8 SC	26.2077			10h	M27 KD	26.8811	ND			0
	B01	SYBR	B-Actin	Unkn	M19 WD	27.1448			10h	M28 KD	29.5369	35.7178	6.18087	-5.81913	56.4589
	B02	SYBR	B-Actin	Unkn	M20 WD	27.6601			10h	M29 KD	27.5599	34.5297	6.96989	-5.03011	32.6748
	B03	SYBR	B-Actin	Unkn	M21 WD	28.173			10h	M30 KD	27.8996	35.1753	7.27567	-4.72433	26.4342
	B04	SYBR	B-Actin	Unkn	M22 WD	27.4798			10h	M31 KD	28.5706	35.5654	6.99484	-5.00516	32.1148
	B05	SYBR	B-Actin	Unkn	M23 WD	26.656
	B07	SYBR	B-Actin	Unkn	M27 KD	27.5594
	B08	SYBR	B-Actin	Unkn	M28 KD	30.0465
	B09	SYBR	B-Actin	Unkn	M29 KD	27.811
	B10	SYBR	B-Actin	Unkn	M30 KD	28.398
	B11	SYBR	B-Actin	Unkn	M31 KD	29.0508
	C01	SYBR	TNF-a	Unkn	M4 SC	32.0577
	C02	SYBR	TNF-a	Unkn	M5 SC	30.0036
	C03	SYBR	TNF-a	Unkn	M6 SC	31.6835
	C04	SYBR	TNF-a	Unkn	M7 SC	32.2191
	C05	SYBR	TNF-a	Unkn	M8 SC	32.4971
	D01	SYBR	TNF-a	Unkn	M19 WD	33.0805
	D02	SYBR	TNF-a	Unkn	M20 WD	33.3258
	D03	SYBR	TNF-a	Unkn	M21 WD	34.02
	D04	SYBR	TNF-a	Unkn	M22 WD	33.464
	D05	SYBR	TNF-a	Unkn	M23 WD	32.3751
	D07	SYBR	TNF-a	Unkn	M27 KD	33.2098
	D08	SYBR	TNF-a	Unkn	M28 KD	34.9579
	D09	SYBR	TNF-a	Unkn	M29 KD	33.5345
	D10	SYBR	TNF-a	Unkn	M30 KD	34.1071
	D11	SYBR	TNF-a	Unkn	M31 KD	35.1475

## Sheet: Figure 1C, D, F, G (4)
	Well	Fluor	Target	Content	Sample	Cq	SQ
	A01	SYBR	B-Actin	Unkn	M4 SC	24.4894					Normalizer
	A02	SYBR	B-Actin	Unkn	M5 SC	26.3786			Time post-LPS	Mouse # / Diet	Actin	TNFalpha	△Ct	△△Ct	RQ
	A03	SYBR	B-Actin	Unkn	M6 SC	25.5915			15h	M4 SC	24.404	29.8219	5.41784	-6.58216	95.8137
	A04	SYBR	B-Actin	Unkn	M7 SC	24.6248			15h	M5 SC	26.5294	31.2232	4.6938	-7.3062	158.266
	A05	SYBR	B-Actin	Unkn	M8 SC	24.0128			15h	M6 SC	25.5121	30.6804	5.16834	-6.83166	113.903
	B01	SYBR	B-Actin	Unkn	M19 WD	29.5493			15h	M7 SC	24.7419	30.2721	5.53018	-6.46982	88.6358
	B02	SYBR	B-Actin	Unkn	M20 WD	28.8214			15h	M8 SC	24.0835	29.3556	5.2721	-6.7279	105.998
	B03	SYBR	B-Actin	Unkn	M21 WD	29.4737			15h	M19 WD	29.4662	35.1742	5.70793	-6.29207	78.3612
	B04	SYBR	B-Actin	Unkn	M22 WD	28.498			15h	M20 WD	28.7728	34.6796	5.90684	-6.09316	68.2692
	B05	SYBR	B-Actin	Unkn	M23 WD	28.1975			15h	M21 WD	29.4709	35.6056	6.13468	-5.86532	58.2959
	B07	SYBR	B-Actin	Unkn	M27 KD	27.4144			15h	M22 WD	28.4878	33.7562	5.26847	-6.73153	106.266
	B08	SYBR	B-Actin	Unkn	M28 KD	28.628			15h	M23 WD	27.9693	34.2076	6.23832	-5.76168	54.2548
	B09	SYBR	B-Actin	Unkn	M29 KD	28.5822			15h	M27 KD	27.3345	33.3017	5.96722	-6.03278	65.4708
	B10	SYBR	B-Actin	Unkn	M30 KD	28.0541			15h	M28 KD	28.4951	33.9193	5.4242	-6.5758	95.3926
	B11	SYBR	B-Actin	Unkn	M31 KD	28.8546			15h	M29 KD	28.5942	34.6671	6.07281	-5.92719	60.8503
	E01	SYBR	IL-6	Unkn	M4 SC	34.5388			15h	M30 KD	27.7892	35.0653	7.27608	-4.72392	26.4266
	E02	SYBR	IL-6	Unkn	M5 SC	36.3277			15h	M31 KD	28.7272	34.4984	5.77117	-6.22883	75.0008
	E03	SYBR	IL-6	Unkn	M6 SC	34.2756
	E04	SYBR	IL-6	Unkn	M7 SC	34.3772
	E05	SYBR	IL-6	Unkn	M8 SC	33.7052				Calibrator	12
	F01	SYBR	IL-6	Unkn	M19 WD	36.7627
	F02	SYBR	IL-6	Unkn	M20 WD	37.3206					Normalizer
	F03	SYBR	IL-6	Unkn	M21 WD	37.3885			Time post-LPS	Mouse # / Diet	Actin	IL-6	△Ct	△△Ct	RQ
	F04	SYBR	IL-6	Unkn	M22 WD	35.2376			15h	M4 SC	24.4894	34.5388	10.0494	-1.95063	3.86545
	F05	SYBR	IL-6	Unkn	M23 WD	36.7586			15h	M5 SC	26.3786	36.3277	9.94908	-2.05092	4.14369
	F07	SYBR	IL-6	Unkn	M27 KD	37.3376			15h	M6 SC	25.5915	34.2756	8.6841	-3.3159	9.95833
	F08	SYBR	IL-6	Unkn	M28 KD	36.3553			15h	M7 SC	24.6248	34.3772	9.75236	-2.24764	4.74906
	F09	SYBR	IL-6	Unkn	M29 KD	37.2733			15h	M8 SC	24.0128	33.7052	9.69246	-2.30754	4.9504
	F10	SYBR	IL-6	Unkn	M30 KD	37.2401			15h	M19 WD	29.5493	36.7627	7.21341	-4.78659	27.5999
	F11	SYBR	IL-6	Unkn	M31 KD	38.1783			15h	M20 WD	28.8214	37.3206	8.49918	-3.50082	11.3201
	G01	SYBR	IL-10	Unkn	M4 SC	31.163			15h	M21 WD	29.4737	37.3885	7.91475	-4.08525	16.974
	G02	SYBR	IL-10	Unkn	M5 SC	33.6141			15h	M22 WD	28.498	35.2376	6.73957	-5.26043	38.3308
	G03	SYBR	IL-10	Unkn	M6 SC	33.114			15h	M23 WD	28.1975	36.7586	8.56113	-3.43887	10.8443
	G04	SYBR	IL-10	Unkn	M7 SC	31.38			15h	M27 KD	27.4144	37.3376	9.92326	-2.07674	4.21852
	G05	SYBR	IL-10	Unkn	M8 SC	31.5289			15h	M28 KD	28.628	36.3553	7.72733	-4.27267	19.3287
	H01	SYBR	IL-10	Unkn	M19 WD	36.3609			15h	M29 KD	28.5822	37.2733	8.69115	-3.30885	9.90975
	H02	SYBR	IL-10	Unkn	M20 WD	35.0779			15h	M30 KD	28.0541	37.2401	9.18606	-2.81394	7.03202
	H03	SYBR	IL-10	Unkn	M21 WD	36.4389			15h	M31 KD	28.8546	38.1783	9.3237	-2.6763	6.39216
	H04	SYBR	IL-10	Unkn	M22 WD	34.8563
	H05	SYBR	IL-10	Unkn	M23 WD	35.6873
	H07	SYBR	IL-10	Unkn	M27 KD	33.9969
	H08	SYBR	IL-10	Unkn	M28 KD	34.8094					Normalizer
	H09	SYBR	IL-10	Unkn	M29 KD	34.6555			Time post-LPS	Mouse # / Diet	Actin	IL-10	△Ct	△△Ct	RQ
	H10	SYBR	IL-10	Unkn	M30 KD	35.473			15h	M4 SC	24.4894	31.163	6.6736	-5.3264	40.1243
	H11	SYBR	IL-10	Unkn	M31 KD	35.4087			15h	M5 SC	26.3786	33.6141	7.23551	-4.76449	27.1803
									15h	M6 SC	25.5915	33.114	7.5225	-4.4775	22.2773
									15h	M7 SC	24.6248	31.38	6.75517	-5.24483	37.9184
	E01	SYBR	B-Actin	Unkn	M4 SC	24.404			15h	M8 SC	24.0128	31.5289	7.51617	-4.48383	22.3752
	E02	SYBR	B-Actin	Unkn	M5 SC	26.5294			15h	M19 WD	29.5493	36.3609	6.81168	-5.18832	36.462
	E03	SYBR	B-Actin	Unkn	M6 SC	25.5121			15h	M20 WD	28.8214	35.0779	6.25656	-5.74344	53.5732
	E04	SYBR	B-Actin	Unkn	M7 SC	24.7419			15h	M21 WD	29.4737	36.4389	6.96514	-5.03486	32.7827
	E05	SYBR	B-Actin	Unkn	M8 SC	24.0835			15h	M22 WD	28.498	34.8563	6.35826	-5.64174	49.9268
	F01	SYBR	B-Actin	Unkn	M19 WD	29.4662			15h	M23 WD	28.1975	35.6873	7.48987	-4.51013	22.7868
	F02	SYBR	B-Actin	Unkn	M20 WD	28.7728			15h	M27 KD	27.4144	33.9969	6.58252	-5.41748	42.739
	F03	SYBR	B-Actin	Unkn	M21 WD	29.4709			15h	M28 KD	28.628	34.8094	6.18141	-5.81859	56.4378
	F04	SYBR	B-Actin	Unkn	M22 WD	28.4878			15h	M29 KD	28.5822	34.6555	6.07327	-5.92673	60.831
	F05	SYBR	B-Actin	Unkn	M23 WD	27.9693			15h	M30 KD	28.0541	35.473	7.41893	-4.58107	23.9354
	F07	SYBR	B-Actin	Unkn	M27 KD	27.3345			15h	M31 KD	28.8546	35.4087	6.55416	-5.44584	43.5874
	F08	SYBR	B-Actin	Unkn	M28 KD	28.4951
	F09	SYBR	B-Actin	Unkn	M29 KD	28.5942
	F10	SYBR	B-Actin	Unkn	M30 KD	27.7892
	F11	SYBR	B-Actin	Unkn	M31 KD	28.7272
	G01	SYBR	TNF-a	Unkn	M4 SC	29.8219
	G02	SYBR	TNF-a	Unkn	M5 SC	31.2232
	G03	SYBR	TNF-a	Unkn	M6 SC	30.6804
	G04	SYBR	TNF-a	Unkn	M7 SC	30.2721
	G05	SYBR	TNF-a	Unkn	M8 SC	29.3556
	H01	SYBR	TNF-a	Unkn	M19 WD	35.1742
	H02	SYBR	TNF-a	Unkn	M20 WD	34.6796
	H03	SYBR	TNF-a	Unkn	M21 WD	35.6056
	H04	SYBR	TNF-a	Unkn	M22 WD	33.7562
	H05	SYBR	TNF-a	Unkn	M23 WD	34.2076
	H07	SYBR	TNF-a	Unkn	M27 KD	33.3017
	H08	SYBR	TNF-a	Unkn	M28 KD	33.9193
	H09	SYBR	TNF-a	Unkn	M29 KD	34.6671
	H10	SYBR	TNF-a	Unkn	M30 KD	35.0653
	H11	SYBR	TNF-a	Unkn	M31 KD	34.4984

[truncated: 12 more sheets: Figure 1C, D, F, G (5), Figure 1E (1) + STATS, Figure 1E (2), Figure 1E (3), Figure 1G, Figure 1H, I, Figure 1J, K, L (1) + STATS, Figure 1J, K, L (2), Figure 1J, K, L (3), Figure 1M (1), Figure 1M (2), Figure 1N]
