# Supplementary material for: Enriched dietary saturated fatty acids induce trained immunity via ceramide production that enhances severity of endotoxemia and clearance of infection
Source: eLife. 2022 Oct 20;11:e76744. doi: 10.7554/eLife.76744 (PMC9642993; doi:10.7554/eLife.76744)
Supplement: Figure 2—figure supplement 1—source data 1. [file elife-76744-fig2-figsupp1-data1.xlsx]

## Sheet: Fig 2 S1A+STATS
MPP3 6.23.22					See Source_data_Fig2 for full flow cytometry data set
SC	WD	KD		> > > > > > > > >	6-23-22 Kaufman Ruth Panel 3_Standard Chow_SC1_001.fcs/StandardizedEvents/Cells/FSC Singlets/SSC Singlets/Viable/Lineage-/CD201+CD27+/MPPs/MPP3	12.5	2
2	3	1		> > > > > > > > >	6-23-22 Kaufman Ruth Panel 3_Standard Chow_SC2_002.fcs/StandardizedEvents/Cells/FSC Singlets/SSC Singlets/Viable/Lineage-/CD201+CD27+/MPPs/MPP3	0	0
0	3	13		> > > > > > > > >	6-23-22 Kaufman Ruth Panel 3_Standard Chow_SC3_003.fcs/StandardizedEvents/Cells/FSC Singlets/SSC Singlets/Viable/Lineage-/CD201+CD27+/MPPs/MPP3	5.88	1
1	4	7		> > > > > > > > >	6-23-22 Kaufman Ruth Panel 3_Standard Chow_SC4_004.fcs/StandardizedEvents/Cells/FSC Singlets/SSC Singlets/Viable/Lineage-/CD201+CD27+/MPPs/MPP3	26.7	4
4	3	6		> > > > > > > > >	6-23-22 Kaufman Ruth Panel 3_Standard Chow_SC5_005.fcs/StandardizedEvents/Cells/FSC Singlets/SSC Singlets/Viable/Lineage-/CD201+CD27+/MPPs/MPP3	12.5	1
1	4	6		> > > > > > > > >	6-23-22 Kaufman Ruth Panel 3_Western Diet_WD1_006.fcs/StandardizedEvents/Cells/FSC Singlets/SSC Singlets/Viable/Lineage-/CD201+CD27+/MPPs/MPP3	20	3
				> > > > > > > > >	6-23-22 Kaufman Ruth Panel 3_Western Diet_WD2_007.fcs/StandardizedEvents/Cells/FSC Singlets/SSC Singlets/Viable/Lineage-/CD201+CD27+/MPPs/MPP3	15.8	3
Table Analyzed	Fig S2A			> > > > > > > > >	6-23-22 Kaufman Ruth Panel 3_Western Diet_WD3_008.fcs/StandardizedEvents/Cells/FSC Singlets/SSC Singlets/Viable/Lineage-/CD201+CD27+/MPPs/MPP3	19	4
				> > > > > > > > >	6-23-22 Kaufman Ruth Panel 3_Western Diet_WD4_009.fcs/StandardizedEvents/Cells/FSC Singlets/SSC Singlets/Viable/Lineage-/CD201+CD27+/MPPs/MPP3	15	3
Column B	WD			> > > > > > > > >	6-23-22 Kaufman Ruth Panel 3_Western Diet_WD5_010.fcs/StandardizedEvents/Cells/FSC Singlets/SSC Singlets/Viable/Lineage-/CD201+CD27+/MPPs/MPP3	30.8	4
vs.	vs.			> > > > > > > > >	6-23-22 Kaufman Ruth Panel 3_Ketogenic Diet_KD1_011.fcs/StandardizedEvents/Cells/FSC Singlets/SSC Singlets/Viable/Lineage-/CD201+CD27+/MPPs/MPP3	3.03	1
Column A	SC			> > > > > > > > >	6-23-22 Kaufman Ruth Panel 3_Ketogenic Diet_KD2_012.fcs/StandardizedEvents/Cells/FSC Singlets/SSC Singlets/Viable/Lineage-/CD201+CD27+/MPPs/MPP3	13.3	13
				> > > > > > > > >	6-23-22 Kaufman Ruth Panel 3_Ketogenic Diet_KD3_013.fcs/StandardizedEvents/Cells/FSC Singlets/SSC Singlets/Viable/Lineage-/CD201+CD27+/MPPs/MPP3	13.7	7
Mann Whitney test				> > > > > > > > >	6-23-22 Kaufman Ruth Panel 3_Ketogenic Diet_KD4_014.fcs/StandardizedEvents/Cells/FSC Singlets/SSC Singlets/Viable/Lineage-/CD201+CD27+/MPPs/MPP3	6.67	6
P value	0.0714			> > > > > > > > >	6-23-22 Kaufman Ruth Panel 3_Ketogenic Diet_KD5_015.fcs/StandardizedEvents/Cells/FSC Singlets/SSC Singlets/Viable/Lineage-/CD201+CD27+/MPPs/MPP3	4.51	6
Exact or approximate P value?	Exact
P value summary	ns
Significantly different (P < 0.05)?	No
One- or two-tailed P value?	Two-tailed
Sum of ranks in column A,B	19 , 36
Mann-Whitney U	4
Table Analyzed	Fig S2A
Column C	KD
vs.	vs.
Column A	SC
Mann Whitney test
P value	0.0556
Exact or approximate P value?	Exact
P value summary	ns
Significantly different (P < 0.05)?	No
One- or two-tailed P value?	Two-tailed
Sum of ranks in column A,C	18 , 37
Mann-Whitney U	3

## Sheet: Fig 2 S1B(1)+STATS
Balb/c mice, BMDMs, 4.16.2021 - 4.21.2021
Software Version	3.10.06
Experiment File Path:
Protocol File Path:
Plate Number	Plate 2
Date	2022-04-14
Time	19:18:35
Reader Type:	Synergy HTX
Reader Serial Number:	2009032
Reading Type	Reader
Procedure Details
Plate Type	96 WELL PLATE (Use plate lid)
Eject plate on completion
Read	Absorbance Endpoint
	Full Plate
	Wavelengths: 450
	Read Speed: Normal, Delay: 100 msec, Measurements/Data Point: 8
Layout
		1	2	3	4	5	6	7	8	9	10	11	12
	A	STD1	STD1	SPL1	SPL7	SPL13								Well ID
		1000	1000											Conc/Dil
	B	STD2	STD2	SPL2	SPL8	SPL14								Well ID
		500	500											Conc/Dil
	C	STD3	STD3	SPL3	SPL9	SPL15								Well ID
		250	250											Conc/Dil
	D	STD4	STD4	SPL4	SPL10	SPL16								Well ID
		125	125											Conc/Dil
	E	STD5	STD5	SPL5	SPL11	SPL17								Well ID
		62.5	62.5											Conc/Dil
	F	STD6	STD6	SPL6	SPL12	SPL18								Well ID
		31.3	31.3											Conc/Dil
	G	STD7	STD7											Well ID
		15.6	15.6											Conc/Dil
	H	BLK	BLK											Well ID
														Conc/Dil
Results
Actual Temperature:	20.8
		1	2	3	4	5	6	7	8	9	10	11	12				Blanked 450
	A	3.603	3.512	0.058	0.057	0.057								450				1	2	3	4	5	6	7	8	9
		3.549	3.458	0.004	0.003	0.003								Blank 450			A	3.549	3.458	0.004	0.003	0.003	0	0	0	0
	B	2.832	2.784	0.057	0.059	0.058								450			B	2.778	2.73	0.003	0.005	0.004	0	0	0	0
		2.778	2.73	0.003	0.005	0.004								Blank 450			C	1.554	1.578	0.003	0.144	0.003	0	0	0	0
	C	1.608	1.632	0.057	0.198	0.057								450			D	0.927	0.737					0	0	0
		1.554	1.578	0.003	0.144	0.003								Blank 450			E	0.598	0.504					0	0	0
	D	0.981	0.791	0.439	0.89	1.518								450			F	0.322	0.166					0	0	0
		0.927	0.737	0.384	0.836	1.464								Blank 450			G	0.152	0.129	0	0	0	0	0	0
	E	0.652	0.558	0.533	0.881	1.357								450			H	0	0	0	0	0	0	0	0
		0.598	0.504	0.479	0.827	1.303								Blank 450
	F	0.377	0.22	0.477	0.579	0.909								450
		0.322	0.166	0.423	0.525	0.855								Blank 450			Average Absorbance			SC N	0.004	WD N	0.003	KD N	0.003
	G	0.206	0.183											450			Standards			SC N	0.003	WD N	0.005	KD N	0.004
		0.152	0.129											Blank 450		TNF	1000	3.5035		SC N	0.003	WD N	0.144	KD N	0.003
	H	0.054	0.054											450			500	2.754
		0	0											Blank 450			250	1.566
																	125	0.832
Table Analyzed	Fig S2B TNF																62.5	0.551
																	31.3	0.244
Column B	KD Ctrl																15.7	0.1405
vs.	vs.
Column A	SC Ctrl
Unpaired t test
P value	>0.9999
P value summary	ns
Significantly different (P < 0.05)?	No
One- or two-tailed P value?	Two-tailed
t, df	t=0.000, df=4
Table Analyzed	Fig S2B TNF
Column C	WD Ctrl
vs.	vs.
Column A	SC Ctrl
Unpaired t test
P value	0.3693
P value summary	ns
Significantly different (P < 0.05)?	No
One- or two-tailed P value?	Two-tailed
t, df	t=1.011, df=4

## Sheet: Fig 2 S1B(2)+STATS
Balb/c mice, BMDMs, 4.16.2021 - 4.21.2021
Software Version	3.10.06
Experiment File Path:
Protocol File Path:
Plate Number	Plate 1
Date	2022-04-14
Time	19:16:23
Reader Type:	Synergy HTX
Reader Serial Number:	2009032
Reading Type	Reader
Procedure Details
Plate Type	96 WELL PLATE (Use plate lid)
Eject plate on completion
Read	Absorbance Endpoint
	Full Plate
	Wavelengths: 450
	Read Speed: Normal, Delay: 100 msec, Measurements/Data Point: 8
Layout
		1	2	3	4	5	6	7	8	9	10	11	12
	A	STD1	STD1	SPL1	SPL7	SPL13								Well ID
		1000	1000											Conc/Dil
	B	STD2	STD2	SPL2	SPL8	SPL14								Well ID
		500	500											Conc/Dil
	C	STD3	STD3	SPL3	SPL9	SPL15								Well ID
		250	250											Conc/Dil
	D	STD4	STD4	SPL4	SPL10	SPL16								Well ID
		125	125											Conc/Dil
	E	STD5	STD5	SPL5	SPL11	SPL17								Well ID
		62.5	62.5											Conc/Dil
	F	STD6	STD6	SPL6	SPL12	SPL18								Well ID
		31.3	31.3											Conc/Dil
	G	STD7	STD7											Well ID
		15.6	15.6											Conc/Dil
	H	BLK	BLK											Well ID
														Conc/Dil
Results
Actual Temperature:	20.8
		1	2	3	4	5	6	7	8	9	10	11	12				Blanked 450
	A	3.543	3.485	0.054	0.061	0.058								450				1	2	3	4	5	6	7	8	9
		3.486	3.428	-0.003	0.004	0.001								Blank 450			A	3.486	3.428	-0.003	0.004	0.001	0	0	0	0
	B	2.314	2.306	0.055	0.057	0.063								450			B	2.257	2.249	-0.002	0	0.006	0	0	0	0
		2.257	2.249	-0.002	0	0.006								Blank 450			C	1.317	1.243	-0.003	-0.001	0.014	0	0	0	0
	C	1.374	1.3	0.054	0.056	0.071								450			D	0.733	0.595					0	0	0
		1.317	1.243	-0.003	-0.001	0.014								Blank 450			E	0.383	0.337					0	0	0
	D	0.79	0.652											450			F	0.185	0.159					0	0	0
		0.733	0.595											Blank 450			G	0.087	0.087	0	0	0	0	0	0
	E	0.44	0.394											450			H	-0.002	0.002	0	0	0	0	0	0
		0.383	0.337											Blank 450
	F	0.242	0.216											450
		0.185	0.159											Blank 450			Average Absorbance			SC N	-0.003	WD N	0.004	KD N	0.001
	G	0.144	0.144											450			Standards			SC N	-0.002	WD N	0	KD N	0.006
		0.087	0.087											Blank 450		IL-6	1000	3.457		SC N	-0.003	WD N	-0.001	KD N	0.014
	H	0.055	0.059											450			500	2.253
		-0.002	0.002											Blank 450			250	1.28
																	125	0.664
Table Analyzed	Fig S2B IL-6																62.5	0.36
																	31.3	0.172
Column C	WD Ctrl																15.7	0.087
vs.	vs.
Column A	SC Ctrl
Unpaired t test
P value	0.1265
P value summary	ns
Significantly different (P < 0.05)?	No
One- or two-tailed P value?	Two-tailed
t, df	t=1.925, df=4
Table Analyzed	Fig S2B IL-6
Column B	KD Ctrl
vs.	vs.
Column A	SC Ctrl
Unpaired t test
P value	0.049
P value summary	*
Significantly different (P < 0.05)?	Yes
One- or two-tailed P value?	Two-tailed
t, df	t=2.796, df=4

## Sheet: Fig 2 S1C, D+STATS
Balb/c mice, bone marrow monocytes, 7.29.2020
Well	Fluor	Target	Content	Sample	Cq
A01	SYBR	B-actin	Unkn	SC Naive1	26.1539	Ex vivo Monocytes 2 h LPS			Normalizer
A02	SYBR	B-actin	Unkn	SC Naive2	26.7541			Samples	Actin	TNF	△Ct	△△Ct	RQ	fold change
A03	SYBR	B-actin	Unkn	SC Naive3	25.7305			SC Naive1	26.1539	32.7504	6.59648	-5.40352	42.3274	9.94769
A04	SYBR	B-actin	Unkn	SC LPS1	26.4088			SC Naive2	26.7541	33.0342	6.2801	-5.7199	52.7062	12.2046
A05	SYBR	B-actin	Unkn	SC LPS2	26.214			SC Naive3	25.7305	32.4421	6.71154	-5.28846	39.0828	11.6744
A06	SYBR	B-actin	Unkn	SC LPS3	27.0549			SC LPS1	26.4088	29.612	3.20326	-8.79674	444.716
C01	SYBR	B-actin	Unkn	KD Naive1	27.7191			SC LPS2	26.214	29.1223	2.90827	-9.09173	545.613
C02	SYBR	B-actin	Unkn	KD Naive2	27.314			SC LPS3	27.0549	30.0273	2.97234	-9.02766	521.911
C03	SYBR	B-actin	Unkn	KD Naive3	27.655			KD Naive1	27.7191	33.9426	6.22349	-5.77651	54.8153	17.9462
C04	SYBR	B-actin	Unkn	KD LPS1	28.6577			KD Naive2	27.314	34.696	7.38202	-4.61798	24.5556	15.671
C05	SYBR	B-actin	Unkn	KD LPS2	28.3052			KD Naive3	27.655	34.2126	6.55757	-5.44243	43.4845	23.2863
C06	SYBR	B-actin	Unkn	KD LPS3	30.2562			KD LPS1	28.6577	31.1363	2.47854	-9.52146	734.928
D01	SYBR	TNF	Unkn	SC Naive1	32.7504			KD LPS2	28.3052	30.9794	2.67412	-9.32588	641.754
D02	SYBR	TNF	Unkn	SC Naive2	33.0342			KD LPS3	30.2562	32.3589	2.10273	-9.89727	953.617
D03	SYBR	TNF	Unkn	SC Naive3	32.4421
D04	SYBR	TNF	Unkn	SC LPS1	29.612			Calibrator	12
D05	SYBR	TNF	Unkn	SC LPS2	29.1223
D06	SYBR	TNF	Unkn	SC LPS3	30.0273
D07	SYBR	IL-6	Unkn	SC Naive1	32.1721				Normalizer
D08	SYBR	IL-6	Unkn	SC Naive2	32.3461			Samples	Actin	IL-6	△Ct	△△Ct	RQ	fold change
D09	SYBR	IL-6	Unkn	SC Naive3	31.6865			SC Naive1	26.1539	32.1721	6.01823	-5.98177	63.1965	3.92309
D10	SYBR	IL-6	Unkn	SC LPS1	30.2796			SC Naive2	26.7541	32.3461	5.59208	-6.40792	84.9131	4.22231
D11	SYBR	IL-6	Unkn	SC LPS2	29.9788			SC Naive3	25.7305	31.6865	5.95599	-6.04401	65.9823	4.13924
D12	SYBR	IL-6	Unkn	SC LPS3	30.8485			SC LPS1	26.4088	30.2796	3.87088	-8.12912	279.968
F01	SYBR	TNF	Unkn	KD Naive1	33.9426			SC LPS2	26.214	29.9788	3.76484	-8.23516	301.321
F02	SYBR	TNF	Unkn	KD Naive2	34.696			SC LPS3	27.0549	30.8485	3.79351	-8.20649	295.393
F03	SYBR	TNF	Unkn	KD Naive3	34.2126			KD Naive1	27.7191	35.0511	7.33201	-4.66799	25.4218	11.7063
F04	SYBR	TNF	Unkn	KD LPS1	31.1363			KD Naive2	27.314	35.1394	7.82546	-4.17454	18.0576	7.88665
F05	SYBR	TNF	Unkn	KD LPS2	30.9794			KD Naive3	27.655	34.5614	6.90638	-5.09362	34.1454	10.1009
F06	SYBR	TNF	Unkn	KD LPS3	32.3589			KD LPS1	28.6577	32.415	3.7573	-8.2427	302.9
F07	SYBR	IL-6	Unkn	KD Naive1	35.0511			KD LPS2	28.3052	32.6323	4.32711	-7.67289	204.066
F08	SYBR	IL-6	Unkn	KD Naive2	35.1394			KD LPS3	30.2562	34.2263	3.9701	-8.0299	261.361
F09	SYBR	IL-6	Unkn	KD Naive3	34.5614
F10	SYBR	IL-6	Unkn	KD LPS1	32.415
F11	SYBR	IL-6	Unkn	KD LPS2	32.6323
F12	SYBR	IL-6	Unkn	KD LPS3	34.2263
B01	SYBR	B-actin	Unkn	WD N1	28.475
B02	SYBR	B-actin	Unkn	WD N2	28.2409
B03	SYBR	B-actin	Unkn	WD N3	27.1111
B04	SYBR	B-actin	Unkn	WD L1	27.7725
B05	SYBR	B-actin	Unkn	WD L2	28.5477
B06	SYBR	B-actin	Unkn	WD L3	27.6099
E01	SYBR	TNF	Unkn	WD N1	34.2388
E02	SYBR	TNF	Unkn	WD N2	33.6126
E03	SYBR	TNF	Unkn	WD N3	33.2928
E04	SYBR	TNF	Unkn	WD L1	29.6833
E05	SYBR	TNF	Unkn	WD L2	29.7449
E06	SYBR	TNF	Unkn	WD L3	29.4982
E07	SYBR	IL-6	Unkn	WD N1	32.4641
E08	SYBR	IL-6	Unkn	WD N2	33.4776
E09	SYBR	IL-6	Unkn	WD N3	32.4637
E10	SYBR	IL-6	Unkn	WD L1	31.0687
E11	SYBR	IL-6	Unkn	WD L2	31.3498
E12	SYBR	IL-6	Unkn	WD L3	31.0673
Table Analyzed	Fig S2C tnf 0h
Column B	KD
vs.	vs.
Column A	SC
Unpaired t test
P value	0.7195
P value summary	ns
Significantly different (P < 0.05)?	No
One- or two-tailed P value?	Two-tailed
t, df	t=0.3855, df=4
Table Analyzed	Fig. 2C il-6 0h
Column C	KD Naive
vs.	vs.								Normalizer
Column A	SC Naive							Samples	Actin	IL-6	△Ct	△△Ct	RQ	fold change
								WD N1	28.475	32.4641	3.98919	-8.01081	257.926	2.67973
Unpaired t test								WD N2	28.2409	33.4776	5.23665	-6.76335	108.635	3.77431
P value	0.0053							WD N3	27.1111	32.4637	5.35259	-6.64741	100.247	2.39641
P value summary	**							WD L1	27.7725	31.0687	3.29619	-8.70381	416.973
Significantly different (P < 0.05)?	Yes							WD L2	28.5477	31.3498	2.80206	-9.19794	587.293
One- or two-tailed P value?	Two-tailed							WD L3	27.6099	31.0673	3.4574	-8.5426	372.889
t, df	t=5.510, df=4
									Normalizer
Table Analyzed	Fig. 2D tnf 2h							Samples	Actin	TNF	△Ct	△△Ct	RQ	fold change
								WD N1	28.475	34.2388	5.76389	-6.23611	75.3801	14.1633
Column C	KD							WD N2	28.2409	33.6126	5.37168	-6.62832	98.9286	23.2267
vs.	vs.							WD N3	27.1111	33.2928	6.18169	-5.81831	56.427	14.3863
Column A	SC							WD L1	27.7725	29.6833	1.91078	-10.0892	1089.33
								WD L2	28.5477	29.7449	1.19716	-10.8028	1786.41
Unpaired t test								WD L3	27.6099	29.4982	1.88824	-10.1118	1106.48
P value	0.031
P value summary	*						Table Analyzed	Fig S2C tnf 0h
Significantly different (P < 0.05)?	Yes
One- or two-tailed P value?	Two-tailed						Column C	WD
t, df	t=3.263, df=4						vs.	vs.
							Column A	SC
Table Analyzed	Fig. 2D il-6 2h
							Unpaired t test
Column C	KD						P value	0.0679
vs.	vs.						P value summary	ns
Column A	SC						Significantly different (P < 0.05)?	No
							One- or two-tailed P value?	Two-tailed
Unpaired t test							t, df	t=2.485, df=4
P value	0.0064
P value summary	**						Table Analyzed	Fig S2C il-6 0h
Significantly different (P < 0.05)?	Yes
One- or two-tailed P value?	Two-tailed						Column C	WD
t, df	t=5.224, df=4						vs.	vs.
							Column A	SC
							Unpaired t test
							P value	0.1784
							P value summary	ns
							Significantly different (P < 0.05)?	No
							One- or two-tailed P value?	Two-tailed
							t, df	t=1.630, df=4
							Table Analyzed	Fig 2D tnf 2h
							Column C	WD
							vs.	vs.
							Column A	SC
							Unpaired t test
							P value	0.1223
							P value summary	ns
							Significantly different (P < 0.05)?	No
							One- or two-tailed P value?	Two-tailed
							t, df	t=1.954, df=4
							Table Analyzed	Fig S2D il-6 2h
							Column C	WD
							vs.	vs.
							Column A	SC
							Unpaired t test
							P value	0.0561
							P value summary	ns
							Significantly different (P < 0.05)?	No
							One- or two-tailed P value?	Two-tailed
							t, df	t=2.665, df=4

## Sheet: Fig 2 S1E, F+STATS
	Balb/c mice, splenocytes, 8.3.2020
	Well	Fluor	Target	Content	Sample	Cq	SQ
	A01	SYBR	B-actin	Unkn	SC Naive1	32.8718		Ex vivo Splenocytes 2 h LPS			Normalizer
	A02	SYBR	B-actin	Unkn	SC Naive2	33.0891				Samples	Actin	TNF	△Ct	△△Ct	RQ	fold change
	A03	SYBR	B-actin	Unkn	SC Naive3	31.4868			0h	SC Naive1	32.8718	37.8266	4.95479	-7.04521	132.074	0.920154
	A04	SYBR	B-actin	Unkn	SC LPS1	32.4514			0h	SC Naive2	33.0891	37.3658	4.27667	-7.72333	211.327	0.337485
	A05	SYBR	B-actin	Unkn	SC LPS2	30.7195			0h	SC Naive3	31.4868	37.4402	5.95346	-6.04654	66.0981	0.882882
	A06	SYBR	B-actin	Unkn	SC LPS3	30.109			0h	SC LPS1	32.4514	37.4787	5.0273	-6.9727	125.601
	C01	SYBR	B-actin	Unkn	KD Naive1	32.0388			0h	SC LPS2	30.7195	37.1938	6.47435	-5.52565	46.0666
	C02	SYBR	B-actin	Unkn	KD Naive2	32.6946			0h	SC LPS3	30.109	35.1959	5.08695	-6.91305	120.513
	C03	SYBR	B-actin	Unkn	KD Naive3	32.0929			2h	KD Naive1	32.0388	38.1996	6.16083	-5.83917	57.2487	1.81927
	C04	SYBR	B-actin	Unkn	KD LPS1	32.4237			2h	KD Naive2	32.6946	39.0653	6.37071	-5.62929	49.4976	3.09759
	C05	SYBR	B-actin	Unkn	KD LPS2	32.3692			2h	KD Naive3	32.0929	37.7259	5.63302	-6.36698	82.5379	1.64995
	C06	SYBR	B-actin	Unkn	KD LPS3	32.8555			2h	KD LPS1	32.4237	37.5809	5.15719	-6.84281	114.786
	D01	SYBR	TNF	Unkn	SC Naive1	37.8266			2h	KD LPS2	32.3692	36.7586	4.38941	-7.61059	195.442
	D02	SYBR	TNF	Unkn	SC Naive2	37.3658			2h	KD LPS3	32.8555	38.1537	5.29813	-6.70187	104.103
	D03	SYBR	TNF	Unkn	SC Naive3	37.4402
	D04	SYBR	TNF	Unkn	SC LPS1	37.4787				Calibrator	12
	D05	SYBR	TNF	Unkn	SC LPS2	37.1938
	D06	SYBR	TNF	Unkn	SC LPS3	35.1959
	F01	SYBR	TNF	Unkn	KD Naive1	38.1996
	F02	SYBR	TNF	Unkn	KD Naive2	39.0653
	F03	SYBR	TNF	Unkn	KD Naive3	37.7259
	F04	SYBR	TNF	Unkn	KD LPS1	37.5809
	F05	SYBR	TNF	Unkn	KD LPS2	36.7586
	F06	SYBR	TNF	Unkn	KD LPS3	38.1537
	B01	SYBR	B-actin	Unkn	WD N1	35.8836
	B02	SYBR	B-actin	Unkn	WD N2	32.079
	B03	SYBR	B-actin	Unkn	WD N3	32.954
	B04	SYBR	B-actin	Unkn	WD L1	31.9544
	B05	SYBR	B-actin	Unkn	WD L2	32.8799
	B06	SYBR	B-actin	Unkn	WD L3	31.488
	E01	SYBR	TNF	Unkn	WD N1						Normalizer
	E02	SYBR	TNF	Unkn	WD N2	36.3021				Samples	Actin	TNF	△Ct	△△Ct	RQ	fold change
	E03	SYBR	TNF	Unkn	WD N3	38.4335			0h	WD N1	35.8836					0.803072
	E04	SYBR	TNF	Unkn	WD L1	36.4939			0h	WD N2	32.079	36.3021	4.22306	-7.77694	219.328	0.291256
	E05	SYBR	TNF	Unkn	WD L2	39.3781			0h	WD N3	32.954	38.4335	5.47949	-6.52051	91.8058	1.52749
	E06	SYBR	TNF	Unkn	WD L3	35.5955			0h	WD L1	31.9544	36.4939	4.53946	-7.46054	176.136
									0h	WD L2	32.8799	39.3781	6.49825	-5.50175	45.3098
	Table Analyzed	Fig S2E tnf 0h							0h	WD L3	31.488	35.5955	4.10745	-7.89255	237.626
	Column C	WD							Table Analyzed	Fig S2F tnf 2h
	vs.	vs.
	Column A	SC					38.1629		Column C	WD
									vs.	vs.
	Unpaired t test								Column A	SC
	P value	0.8085
	P value summary	ns					38.5363		Unpaired t test
	Significantly different (P < 0.05)?	No					38.4079		P value	0.7123
	One- or two-tailed P value?	Two-tailed							P value summary	ns
	t, df	t=0.2645, df=3							Significantly different (P < 0.05)?	No
									One- or two-tailed P value?	Two-tailed
	Table Analyzed	Fig S2E							t, df	t=0.3961, df=4
	Column B	KD							Table Analyzed	Fig S2F il-6 2h
	vs.	vs.
	Column A	SC							Column B	KD
									vs.	vs.
	Unpaired t test								Column A	SC
	P value	0.1641
	P value summary	ns							Unpaired t test
	Significantly different (P < 0.05)?	No							P value	0.0405
	One- or two-tailed P value?	Two-tailed							P value summary	*
	t, df	t=1.701, df=4							Significantly different (P < 0.05)?	Yes
									One- or two-tailed P value?	Two-tailed
									t, df	t=2.985, df=4
