# Supplementary material for: Enriched dietary saturated fatty acids induce trained immunity via ceramide production that enhances severity of endotoxemia and clearance of infection
Source: eLife. 2022 Oct 20;11:e76744. doi: 10.7554/eLife.76744 (PMC9642993; doi:10.7554/eLife.76744)
Supplement: Figure 2—source data 1. [file elife-76744-fig2-data1.xlsx]

## Sheet: Fig 2A-C + STATS
Depth	Name	Statistic	#Cells		Fig 2C LT-HSC counts				STATS
> > > > > > >	6-23-22 Kaufman Ruth Panel 3_Ketogenic Diet_KD1_011.fcs/StandardizedEvents/Cells/FSC Singlets/SSC Singlets/Viable/Lineage-/CD201+CD27+	0.64	216		SC	WD	KD		Table Analyzed	Fig 2C LT-HSCs
> > > > > > >	6-23-22 Kaufman Ruth Panel 3_Ketogenic Diet_KD2_012.fcs/StandardizedEvents/Cells/FSC Singlets/SSC Singlets/Viable/Lineage-/CD201+CD27+	0.8	393		43	29	53
> > > > > > >	6-23-22 Kaufman Ruth Panel 3_Ketogenic Diet_KD3_013.fcs/StandardizedEvents/Cells/FSC Singlets/SSC Singlets/Viable/Lineage-/CD201+CD27+	0.42	226		45	39	62		Column C	KD
> > > > > > >	6-23-22 Kaufman Ruth Panel 3_Ketogenic Diet_KD4_014.fcs/StandardizedEvents/Cells/FSC Singlets/SSC Singlets/Viable/Lineage-/CD201+CD27+	0.5	375		48	11	81		vs.	vs.
> > > > > > >	6-23-22 Kaufman Ruth Panel 3_Ketogenic Diet_KD5_015.fcs/StandardizedEvents/Cells/FSC Singlets/SSC Singlets/Viable/Lineage-/CD201+CD27+	1.23	375		28	42	123		Column A	SC
> > > > > > >	6-23-22 Kaufman Ruth Panel 3_Standard Chow_SC1_001.fcs/StandardizedEvents/Cells/FSC Singlets/SSC Singlets/Viable/Lineage-/CD201+CD27+	0.28	91		37	26	74
> > > > > > >	6-23-22 Kaufman Ruth Panel 3_Standard Chow_SC2_002.fcs/StandardizedEvents/Cells/FSC Singlets/SSC Singlets/Viable/Lineage-/CD201+CD27+	0.38	144						Mann Whitney test
> > > > > > >	6-23-22 Kaufman Ruth Panel 3_Standard Chow_SC3_003.fcs/StandardizedEvents/Cells/FSC Singlets/SSC Singlets/Viable/Lineage-/CD201+CD27+	0.47	119		Fig 2C ST-HSC counts				P value	0.0079
> > > > > > >	6-23-22 Kaufman Ruth Panel 3_Standard Chow_SC4_004.fcs/StandardizedEvents/Cells/FSC Singlets/SSC Singlets/Viable/Lineage-/CD201+CD27+	0.26	85		SC	WD	KD		Exact or approximate P value?	Exact
> > > > > > >	6-23-22 Kaufman Ruth Panel 3_Standard Chow_SC5_005.fcs/StandardizedEvents/Cells/FSC Singlets/SSC Singlets/Viable/Lineage-/CD201+CD27+	0.15	89		4	3	5		P value summary	**
> > > > > > >	6-23-22 Kaufman Ruth Panel 3_Western Diet_WD1_006.fcs/StandardizedEvents/Cells/FSC Singlets/SSC Singlets/Viable/Lineage-/CD201+CD27+	0.33	125		7	5	14		Significantly different (P < 0.05)?	Yes
> > > > > > >	6-23-22 Kaufman Ruth Panel 3_Western Diet_WD2_007.fcs/StandardizedEvents/Cells/FSC Singlets/SSC Singlets/Viable/Lineage-/CD201+CD27+	0.24	113		5	4	11		One- or two-tailed P value?	Two-tailed
> > > > > > >	6-23-22 Kaufman Ruth Panel 3_Western Diet_WD3_008.fcs/StandardizedEvents/Cells/FSC Singlets/SSC Singlets/Viable/Lineage-/CD201+CD27+	0.25	69		3	4	14		Sum of ranks in column A,C	15 , 40
> > > > > > >	6-23-22 Kaufman Ruth Panel 3_Western Diet_WD4_009.fcs/StandardizedEvents/Cells/FSC Singlets/SSC Singlets/Viable/Lineage-/CD201+CD27+	0.27	143		3	6	12		Mann-Whitney U	0
> > > > > > >	6-23-22 Kaufman Ruth Panel 3_Western Diet_WD5_010.fcs/StandardizedEvents/Cells/FSC Singlets/SSC Singlets/Viable/Lineage-/CD201+CD27+	0.2	71
	6-23-22 Kaufman Ruth Panel 3_Ketogenic Diet_KD1_011.fcs		2502647		Fig 2C MPP total counts				Table Analyzed	Fig 2C ST-HSC
	6-23-22 Kaufman Ruth Panel 3_Ketogenic Diet_KD1_011.fcs/StandardizedEvents				SC	WD	KD
>	6-23-22 Kaufman Ruth Panel 3_Ketogenic Diet_KD1_011.fcs/DownSample-StandardizedEvents				16	15	33		Column C	KD
>	6-23-22 Kaufman Ruth Panel 3_Ketogenic Diet_KD1_011.fcs/StandardizedEvents	79.5	1989304		15	19	98		vs.	vs.
> >	6-23-22 Kaufman Ruth Panel 3_Ketogenic Diet_KD1_011.fcs/StandardizedEvents/Cells	84.6	1683092		17	21	51		Column A	SC
> > >	6-23-22 Kaufman Ruth Panel 3_Ketogenic Diet_KD1_011.fcs/StandardizedEvents/Cells/FSC Singlets	82.9	1395297		15	20	90
> > > >	6-23-22 Kaufman Ruth Panel 3_Ketogenic Diet_KD1_011.fcs/StandardizedEvents/Cells/FSC Singlets/SSC Singlets	86.1	1201629		8	13	133		Mann Whitney test
> > > > >	6-23-22 Kaufman Ruth Panel 3_Ketogenic Diet_KD1_011.fcs/StandardizedEvents/Cells/FSC Singlets/SSC Singlets/Viable	93.6	1124854						P value	0.0238
> > > > > >	6-23-22 Kaufman Ruth Panel 3_Ketogenic Diet_KD1_011.fcs/StandardizedEvents/Cells/FSC Singlets/SSC Singlets/Viable/Lineage-	2.99	33597						Exact or approximate P value?	Exact
> > > > > > > >	6-23-22 Kaufman Ruth Panel 3_Ketogenic Diet_KD1_011.fcs/StandardizedEvents/Cells/FSC Singlets/SSC Singlets/Viable/Lineage-/CD201+CD27+/CD150-CD48-	53.7	116						P value summary	*
> > > > > > > >	6-23-22 Kaufman Ruth Panel 3_Ketogenic Diet_KD1_011.fcs/StandardizedEvents/Cells/FSC Singlets/SSC Singlets/Viable/Lineage-/CD201+CD27+/LT-HSC	24.5	53						Significantly different (P < 0.05)?	Yes
> > > > > > > >	6-23-22 Kaufman Ruth Panel 3_Ketogenic Diet_KD1_011.fcs/StandardizedEvents/Cells/FSC Singlets/SSC Singlets/Viable/Lineage-/CD201+CD27+/MPPs	15.3	33						One- or two-tailed P value?	Two-tailed
> > > > > > > > >	6-23-22 Kaufman Ruth Panel 3_Ketogenic Diet_KD1_011.fcs/StandardizedEvents/Cells/FSC Singlets/SSC Singlets/Viable/Lineage-/CD201+CD27+/MPPs/MPP3	3.03	1						Sum of ranks in column A,C	16.50 , 38.50
> > > > > > > > >	6-23-22 Kaufman Ruth Panel 3_Ketogenic Diet_KD1_011.fcs/StandardizedEvents/Cells/FSC Singlets/SSC Singlets/Viable/Lineage-/CD201+CD27+/MPPs/MPP4	3.03	1						Mann-Whitney U	1.5
> > > > > > > >	6-23-22 Kaufman Ruth Panel 3_Ketogenic Diet_KD1_011.fcs/StandardizedEvents/Cells/FSC Singlets/SSC Singlets/Viable/Lineage-/CD201+CD27+/ST-HSC	2.31	5
	6-23-22 Kaufman Ruth Panel 3_Ketogenic Diet_KD2_012.fcs		3000000						Table Analyzed	Fig 2C MPPs
	6-23-22 Kaufman Ruth Panel 3_Ketogenic Diet_KD2_012.fcs/StandardizedEvents
>	6-23-22 Kaufman Ruth Panel 3_Ketogenic Diet_KD2_012.fcs/DownSample-StandardizedEvents								Column C	KD
>	6-23-22 Kaufman Ruth Panel 3_Ketogenic Diet_KD2_012.fcs/StandardizedEvents	66.3	1989304						vs.	vs.
> >	6-23-22 Kaufman Ruth Panel 3_Ketogenic Diet_KD2_012.fcs/StandardizedEvents/Cells	82.1	1632749						Column A	SC
> > >	6-23-22 Kaufman Ruth Panel 3_Ketogenic Diet_KD2_012.fcs/StandardizedEvents/Cells/FSC Singlets	77.9	1272224
> > > >	6-23-22 Kaufman Ruth Panel 3_Ketogenic Diet_KD2_012.fcs/StandardizedEvents/Cells/FSC Singlets/SSC Singlets	76	967313						Mann Whitney test
> > > > >	6-23-22 Kaufman Ruth Panel 3_Ketogenic Diet_KD2_012.fcs/StandardizedEvents/Cells/FSC Singlets/SSC Singlets/Viable	94.3	911855						P value	0.0079
> > > > > >	6-23-22 Kaufman Ruth Panel 3_Ketogenic Diet_KD2_012.fcs/StandardizedEvents/Cells/FSC Singlets/SSC Singlets/Viable/Lineage-	5.39	49158						Exact or approximate P value?	Exact
> > > > > > > >	6-23-22 Kaufman Ruth Panel 3_Ketogenic Diet_KD2_012.fcs/StandardizedEvents/Cells/FSC Singlets/SSC Singlets/Viable/Lineage-/CD201+CD27+/CD150-CD48-	50.4	198						P value summary	**
> > > > > > > >	6-23-22 Kaufman Ruth Panel 3_Ketogenic Diet_KD2_012.fcs/StandardizedEvents/Cells/FSC Singlets/SSC Singlets/Viable/Lineage-/CD201+CD27+/LT-HSC	15.8	62						Significantly different (P < 0.05)?	Yes
> > > > > > > >	6-23-22 Kaufman Ruth Panel 3_Ketogenic Diet_KD2_012.fcs/StandardizedEvents/Cells/FSC Singlets/SSC Singlets/Viable/Lineage-/CD201+CD27+/MPPs	24.9	98						One- or two-tailed P value?	Two-tailed
> > > > > > > > >	6-23-22 Kaufman Ruth Panel 3_Ketogenic Diet_KD2_012.fcs/StandardizedEvents/Cells/FSC Singlets/SSC Singlets/Viable/Lineage-/CD201+CD27+/MPPs/MPP3	13.3	13						Sum of ranks in column A,C	15 , 40
> > > > > > > > >	6-23-22 Kaufman Ruth Panel 3_Ketogenic Diet_KD2_012.fcs/StandardizedEvents/Cells/FSC Singlets/SSC Singlets/Viable/Lineage-/CD201+CD27+/MPPs/MPP4	0	0						Mann-Whitney U	0
> > > > > > > >	6-23-22 Kaufman Ruth Panel 3_Ketogenic Diet_KD2_012.fcs/StandardizedEvents/Cells/FSC Singlets/SSC Singlets/Viable/Lineage-/CD201+CD27+/ST-HSC	3.56	14
	6-23-22 Kaufman Ruth Panel 3_Ketogenic Diet_KD3_013.fcs		2817756
	6-23-22 Kaufman Ruth Panel 3_Ketogenic Diet_KD3_013.fcs/StandardizedEvents
>	6-23-22 Kaufman Ruth Panel 3_Ketogenic Diet_KD3_013.fcs/DownSample-StandardizedEvents
>	6-23-22 Kaufman Ruth Panel 3_Ketogenic Diet_KD3_013.fcs/StandardizedEvents	70.6	1989304
> >	6-23-22 Kaufman Ruth Panel 3_Ketogenic Diet_KD3_013.fcs/StandardizedEvents/Cells	83.7	1665876
> > >	6-23-22 Kaufman Ruth Panel 3_Ketogenic Diet_KD3_013.fcs/StandardizedEvents/Cells/FSC Singlets	79	1316726
> > > >	6-23-22 Kaufman Ruth Panel 3_Ketogenic Diet_KD3_013.fcs/StandardizedEvents/Cells/FSC Singlets/SSC Singlets	82.8	1090274
> > > > >	6-23-22 Kaufman Ruth Panel 3_Ketogenic Diet_KD3_013.fcs/StandardizedEvents/Cells/FSC Singlets/SSC Singlets/Viable	93.5	1019932
> > > > > >	6-23-22 Kaufman Ruth Panel 3_Ketogenic Diet_KD3_013.fcs/StandardizedEvents/Cells/FSC Singlets/SSC Singlets/Viable/Lineage-	5.3	54060
> > > > > > > >	6-23-22 Kaufman Ruth Panel 3_Ketogenic Diet_KD3_013.fcs/StandardizedEvents/Cells/FSC Singlets/SSC Singlets/Viable/Lineage-/CD201+CD27+/CD150-CD48-	32.7	74
> > > > > > > >	6-23-22 Kaufman Ruth Panel 3_Ketogenic Diet_KD3_013.fcs/StandardizedEvents/Cells/FSC Singlets/SSC Singlets/Viable/Lineage-/CD201+CD27+/LT-HSC	35.8	81
> > > > > > > >	6-23-22 Kaufman Ruth Panel 3_Ketogenic Diet_KD3_013.fcs/StandardizedEvents/Cells/FSC Singlets/SSC Singlets/Viable/Lineage-/CD201+CD27+/MPPs	22.6	51
> > > > > > > > >	6-23-22 Kaufman Ruth Panel 3_Ketogenic Diet_KD3_013.fcs/StandardizedEvents/Cells/FSC Singlets/SSC Singlets/Viable/Lineage-/CD201+CD27+/MPPs/MPP3	13.7	7
> > > > > > > > >	6-23-22 Kaufman Ruth Panel 3_Ketogenic Diet_KD3_013.fcs/StandardizedEvents/Cells/FSC Singlets/SSC Singlets/Viable/Lineage-/CD201+CD27+/MPPs/MPP4	1.96	1
> > > > > > > >	6-23-22 Kaufman Ruth Panel 3_Ketogenic Diet_KD3_013.fcs/StandardizedEvents/Cells/FSC Singlets/SSC Singlets/Viable/Lineage-/CD201+CD27+/ST-HSC	4.87	11
	6-23-22 Kaufman Ruth Panel 3_Ketogenic Diet_KD4_014.fcs		3000000
	6-23-22 Kaufman Ruth Panel 3_Ketogenic Diet_KD4_014.fcs/StandardizedEvents
>	6-23-22 Kaufman Ruth Panel 3_Ketogenic Diet_KD4_014.fcs/DownSample-StandardizedEvents
>	6-23-22 Kaufman Ruth Panel 3_Ketogenic Diet_KD4_014.fcs/StandardizedEvents	66.3	1989304
> >	6-23-22 Kaufman Ruth Panel 3_Ketogenic Diet_KD4_014.fcs/StandardizedEvents/Cells	85.2	1695805
> > >	6-23-22 Kaufman Ruth Panel 3_Ketogenic Diet_KD4_014.fcs/StandardizedEvents/Cells/FSC Singlets	78.2	1326034
> > > >	6-23-22 Kaufman Ruth Panel 3_Ketogenic Diet_KD4_014.fcs/StandardizedEvents/Cells/FSC Singlets/SSC Singlets	86.2	1142540
> > > > >	6-23-22 Kaufman Ruth Panel 3_Ketogenic Diet_KD4_014.fcs/StandardizedEvents/Cells/FSC Singlets/SSC Singlets/Viable	95.5	1090822
> > > > > >	6-23-22 Kaufman Ruth Panel 3_Ketogenic Diet_KD4_014.fcs/StandardizedEvents/Cells/FSC Singlets/SSC Singlets/Viable/Lineage-	6.84	74568
> > > > > > > >	6-23-22 Kaufman Ruth Panel 3_Ketogenic Diet_KD4_014.fcs/StandardizedEvents/Cells/FSC Singlets/SSC Singlets/Viable/Lineage-/CD201+CD27+/CD150-CD48-	34.1	128
> > > > > > > >	6-23-22 Kaufman Ruth Panel 3_Ketogenic Diet_KD4_014.fcs/StandardizedEvents/Cells/FSC Singlets/SSC Singlets/Viable/Lineage-/CD201+CD27+/LT-HSC	32.8	123
> > > > > > > >	6-23-22 Kaufman Ruth Panel 3_Ketogenic Diet_KD4_014.fcs/StandardizedEvents/Cells/FSC Singlets/SSC Singlets/Viable/Lineage-/CD201+CD27+/MPPs	24	90
> > > > > > > > >	6-23-22 Kaufman Ruth Panel 3_Ketogenic Diet_KD4_014.fcs/StandardizedEvents/Cells/FSC Singlets/SSC Singlets/Viable/Lineage-/CD201+CD27+/MPPs/MPP3	6.67	6
> > > > > > > > >	6-23-22 Kaufman Ruth Panel 3_Ketogenic Diet_KD4_014.fcs/StandardizedEvents/Cells/FSC Singlets/SSC Singlets/Viable/Lineage-/CD201+CD27+/MPPs/MPP4	1.11	1
> > > > > > > >	6-23-22 Kaufman Ruth Panel 3_Ketogenic Diet_KD4_014.fcs/StandardizedEvents/Cells/FSC Singlets/SSC Singlets/Viable/Lineage-/CD201+CD27+/ST-HSC	3.73	14
	6-23-22 Kaufman Ruth Panel 3_Ketogenic Diet_KD5_015.fcs		3000000
	6-23-22 Kaufman Ruth Panel 3_Ketogenic Diet_KD5_015.fcs/StandardizedEvents
>	6-23-22 Kaufman Ruth Panel 3_Ketogenic Diet_KD5_015.fcs/DownSample-StandardizedEvents
>	6-23-22 Kaufman Ruth Panel 3_Ketogenic Diet_KD5_015.fcs/StandardizedEvents	66.3	1989304
> >	6-23-22 Kaufman Ruth Panel 3_Ketogenic Diet_KD5_015.fcs/StandardizedEvents/Cells	87.7	1745572
> > >	6-23-22 Kaufman Ruth Panel 3_Ketogenic Diet_KD5_015.fcs/StandardizedEvents/Cells/FSC Singlets	73.6	1285584
> > > >	6-23-22 Kaufman Ruth Panel 3_Ketogenic Diet_KD5_015.fcs/StandardizedEvents/Cells/FSC Singlets/SSC Singlets	80.5	1035252
> > > > >	6-23-22 Kaufman Ruth Panel 3_Ketogenic Diet_KD5_015.fcs/StandardizedEvents/Cells/FSC Singlets/SSC Singlets/Viable	95.6	990197
> > > > > >	6-23-22 Kaufman Ruth Panel 3_Ketogenic Diet_KD5_015.fcs/StandardizedEvents/Cells/FSC Singlets/SSC Singlets/Viable/Lineage-	3.09	30604
> > > > > > > >	6-23-22 Kaufman Ruth Panel 3_Ketogenic Diet_KD5_015.fcs/StandardizedEvents/Cells/FSC Singlets/SSC Singlets/Viable/Lineage-/CD201+CD27+/CD150-CD48-	38.4	144
> > > > > > > >	6-23-22 Kaufman Ruth Panel 3_Ketogenic Diet_KD5_015.fcs/StandardizedEvents/Cells/FSC Singlets/SSC Singlets/Viable/Lineage-/CD201+CD27+/LT-HSC	19.7	74
> > > > > > > >	6-23-22 Kaufman Ruth Panel 3_Ketogenic Diet_KD5_015.fcs/StandardizedEvents/Cells/FSC Singlets/SSC Singlets/Viable/Lineage-/CD201+CD27+/MPPs	35.5	133
> > > > > > > > >	6-23-22 Kaufman Ruth Panel 3_Ketogenic Diet_KD5_015.fcs/StandardizedEvents/Cells/FSC Singlets/SSC Singlets/Viable/Lineage-/CD201+CD27+/MPPs/MPP3	4.51	6
> > > > > > > > >	6-23-22 Kaufman Ruth Panel 3_Ketogenic Diet_KD5_015.fcs/StandardizedEvents/Cells/FSC Singlets/SSC Singlets/Viable/Lineage-/CD201+CD27+/MPPs/MPP4	0.75	1
> > > > > > > >	6-23-22 Kaufman Ruth Panel 3_Ketogenic Diet_KD5_015.fcs/StandardizedEvents/Cells/FSC Singlets/SSC Singlets/Viable/Lineage-/CD201+CD27+/ST-HSC	3.2	12
	6-23-22 Kaufman Ruth Panel 3_Standard Chow_SC1_001.fcs		1989304
	6-23-22 Kaufman Ruth Panel 3_Standard Chow_SC1_001.fcs/StandardizedEvents
>	6-23-22 Kaufman Ruth Panel 3_Standard Chow_SC1_001.fcs/DownSample-StandardizedEvents
>	6-23-22 Kaufman Ruth Panel 3_Standard Chow_SC1_001.fcs/StandardizedEvents	100	1989304
> >	6-23-22 Kaufman Ruth Panel 3_Standard Chow_SC1_001.fcs/StandardizedEvents/Cells	76	1512416
> > >	6-23-22 Kaufman Ruth Panel 3_Standard Chow_SC1_001.fcs/StandardizedEvents/Cells/FSC Singlets	84	1270133
> > > >	6-23-22 Kaufman Ruth Panel 3_Standard Chow_SC1_001.fcs/StandardizedEvents/Cells/FSC Singlets/SSC Singlets	85.4	1084448
> > > > >	6-23-22 Kaufman Ruth Panel 3_Standard Chow_SC1_001.fcs/StandardizedEvents/Cells/FSC Singlets/SSC Singlets/Viable	90.1	976804
> > > > > >	6-23-22 Kaufman Ruth Panel 3_Standard Chow_SC1_001.fcs/StandardizedEvents/Cells/FSC Singlets/SSC Singlets/Viable/Lineage-	3.29	32111
> > > > > > > >	6-23-22 Kaufman Ruth Panel 3_Standard Chow_SC1_001.fcs/StandardizedEvents/Cells/FSC Singlets/SSC Singlets/Viable/Lineage-/CD201+CD27+/CD150-CD48-	27.5	25
> > > > > > > >	6-23-22 Kaufman Ruth Panel 3_Standard Chow_SC1_001.fcs/StandardizedEvents/Cells/FSC Singlets/SSC Singlets/Viable/Lineage-/CD201+CD27+/LT-HSC	47.3	43
> > > > > > > >	6-23-22 Kaufman Ruth Panel 3_Standard Chow_SC1_001.fcs/StandardizedEvents/Cells/FSC Singlets/SSC Singlets/Viable/Lineage-/CD201+CD27+/MPPs	17.6	16
> > > > > > > > >	6-23-22 Kaufman Ruth Panel 3_Standard Chow_SC1_001.fcs/StandardizedEvents/Cells/FSC Singlets/SSC Singlets/Viable/Lineage-/CD201+CD27+/MPPs/MPP3	12.5	2
> > > > > > > > >	6-23-22 Kaufman Ruth Panel 3_Standard Chow_SC1_001.fcs/StandardizedEvents/Cells/FSC Singlets/SSC Singlets/Viable/Lineage-/CD201+CD27+/MPPs/MPP4	6.25	1
> > > > > > > >	6-23-22 Kaufman Ruth Panel 3_Standard Chow_SC1_001.fcs/StandardizedEvents/Cells/FSC Singlets/SSC Singlets/Viable/Lineage-/CD201+CD27+/ST-HSC	4.4	4
	6-23-22 Kaufman Ruth Panel 3_Standard Chow_SC2_002.fcs		3000000
	6-23-22 Kaufman Ruth Panel 3_Standard Chow_SC2_002.fcs/Events
	6-23-22 Kaufman Ruth Panel 3_Standard Chow_SC2_002.fcs/StandardizedEvents
>	6-23-22 Kaufman Ruth Panel 3_Standard Chow_SC2_002.fcs/DownSample-StandardizedEvents
>	6-23-22 Kaufman Ruth Panel 3_Standard Chow_SC2_002.fcs/StandardizedEvents	66.3	1989304
> >	6-23-22 Kaufman Ruth Panel 3_Standard Chow_SC2_002.fcs/StandardizedEvents/Cells	77.9	1549533
> > >	6-23-22 Kaufman Ruth Panel 3_Standard Chow_SC2_002.fcs/StandardizedEvents/Cells/FSC Singlets	81.6	1264740
> > > >	6-23-22 Kaufman Ruth Panel 3_Standard Chow_SC2_002.fcs/StandardizedEvents/Cells/FSC Singlets/SSC Singlets	88.6	1121168
> > > > >	6-23-22 Kaufman Ruth Panel 3_Standard Chow_SC2_002.fcs/StandardizedEvents/Cells/FSC Singlets/SSC Singlets/Viable	91.6	1026557
> > > > > >	6-23-22 Kaufman Ruth Panel 3_Standard Chow_SC2_002.fcs/StandardizedEvents/Cells/FSC Singlets/SSC Singlets/Viable/Lineage-	3.65	37520
> > > > > > > >	6-23-22 Kaufman Ruth Panel 3_Standard Chow_SC2_002.fcs/StandardizedEvents/Cells/FSC Singlets/SSC Singlets/Viable/Lineage-/CD201+CD27+/CD150-CD48-	44.4	64
> > > > > > > >	6-23-22 Kaufman Ruth Panel 3_Standard Chow_SC2_002.fcs/StandardizedEvents/Cells/FSC Singlets/SSC Singlets/Viable/Lineage-/CD201+CD27+/LT-HSC	31.2	45
> > > > > > > >	6-23-22 Kaufman Ruth Panel 3_Standard Chow_SC2_002.fcs/StandardizedEvents/Cells/FSC Singlets/SSC Singlets/Viable/Lineage-/CD201+CD27+/MPPs	10.4	15
> > > > > > > > >	6-23-22 Kaufman Ruth Panel 3_Standard Chow_SC2_002.fcs/StandardizedEvents/Cells/FSC Singlets/SSC Singlets/Viable/Lineage-/CD201+CD27+/MPPs/MPP3	0	0
> > > > > > > > >	6-23-22 Kaufman Ruth Panel 3_Standard Chow_SC2_002.fcs/StandardizedEvents/Cells/FSC Singlets/SSC Singlets/Viable/Lineage-/CD201+CD27+/MPPs/MPP4	0	0
> > > > > > > >	6-23-22 Kaufman Ruth Panel 3_Standard Chow_SC2_002.fcs/StandardizedEvents/Cells/FSC Singlets/SSC Singlets/Viable/Lineage-/CD201+CD27+/ST-HSC	4.86	7
	6-23-22 Kaufman Ruth Panel 3_Standard Chow_SC3_003.fcs		2968820
	6-23-22 Kaufman Ruth Panel 3_Standard Chow_SC3_003.fcs/StandardizedEvents
>	6-23-22 Kaufman Ruth Panel 3_Standard Chow_SC3_003.fcs/DownSample-StandardizedEvents
>	6-23-22 Kaufman Ruth Panel 3_Standard Chow_SC3_003.fcs/StandardizedEvents	67	1989304
> >	6-23-22 Kaufman Ruth Panel 3_Standard Chow_SC3_003.fcs/StandardizedEvents/Cells	77.2	1535767
> > >	6-23-22 Kaufman Ruth Panel 3_Standard Chow_SC3_003.fcs/StandardizedEvents/Cells/FSC Singlets	81.6	1253150
> > > >	6-23-22 Kaufman Ruth Panel 3_Standard Chow_SC3_003.fcs/StandardizedEvents/Cells/FSC Singlets/SSC Singlets	82.6	1035479
> > > > >	6-23-22 Kaufman Ruth Panel 3_Standard Chow_SC3_003.fcs/StandardizedEvents/Cells/FSC Singlets/SSC Singlets/Viable	91	941781
> > > > > >	6-23-22 Kaufman Ruth Panel 3_Standard Chow_SC3_003.fcs/StandardizedEvents/Cells/FSC Singlets/SSC Singlets/Viable/Lineage-	2.71	25530
> > > > > > > >	6-23-22 Kaufman Ruth Panel 3_Standard Chow_SC3_003.fcs/StandardizedEvents/Cells/FSC Singlets/SSC Singlets/Viable/Lineage-/CD201+CD27+/CD150-CD48-	36.1	43
> > > > > > > >	6-23-22 Kaufman Ruth Panel 3_Standard Chow_SC3_003.fcs/StandardizedEvents/Cells/FSC Singlets/SSC Singlets/Viable/Lineage-/CD201+CD27+/LT-HSC	40.3	48
> > > > > > > >	6-23-22 Kaufman Ruth Panel 3_Standard Chow_SC3_003.fcs/StandardizedEvents/Cells/FSC Singlets/SSC Singlets/Viable/Lineage-/CD201+CD27+/MPPs	14.3	17
> > > > > > > > >	6-23-22 Kaufman Ruth Panel 3_Standard Chow_SC3_003.fcs/StandardizedEvents/Cells/FSC Singlets/SSC Singlets/Viable/Lineage-/CD201+CD27+/MPPs/MPP3	5.88	1
> > > > > > > > >	6-23-22 Kaufman Ruth Panel 3_Standard Chow_SC3_003.fcs/StandardizedEvents/Cells/FSC Singlets/SSC Singlets/Viable/Lineage-/CD201+CD27+/MPPs/MPP4	0	0
> > > > > > > >	6-23-22 Kaufman Ruth Panel 3_Standard Chow_SC3_003.fcs/StandardizedEvents/Cells/FSC Singlets/SSC Singlets/Viable/Lineage-/CD201+CD27+/ST-HSC	4.2	5
	6-23-22 Kaufman Ruth Panel 3_Standard Chow_SC4_004.fcs		2661237
	6-23-22 Kaufman Ruth Panel 3_Standard Chow_SC4_004.fcs/StandardizedEvents
>	6-23-22 Kaufman Ruth Panel 3_Standard Chow_SC4_004.fcs/DownSample-StandardizedEvents
>	6-23-22 Kaufman Ruth Panel 3_Standard Chow_SC4_004.fcs/StandardizedEvents	74.8	1989304
> >	6-23-22 Kaufman Ruth Panel 3_Standard Chow_SC4_004.fcs/StandardizedEvents/Cells	79.3	1577265
> > >	6-23-22 Kaufman Ruth Panel 3_Standard Chow_SC4_004.fcs/StandardizedEvents/Cells/FSC Singlets	82.2	1295925
> > > >	6-23-22 Kaufman Ruth Panel 3_Standard Chow_SC4_004.fcs/StandardizedEvents/Cells/FSC Singlets/SSC Singlets	80.9	1049036
> > > > >	6-23-22 Kaufman Ruth Panel 3_Standard Chow_SC4_004.fcs/StandardizedEvents/Cells/FSC Singlets/SSC Singlets/Viable	90.7	951679
> > > > > >	6-23-22 Kaufman Ruth Panel 3_Standard Chow_SC4_004.fcs/StandardizedEvents/Cells/FSC Singlets/SSC Singlets/Viable/Lineage-	3.49	33254
> > > > > > > >	6-23-22 Kaufman Ruth Panel 3_Standard Chow_SC4_004.fcs/StandardizedEvents/Cells/FSC Singlets/SSC Singlets/Viable/Lineage-/CD201+CD27+/CD150-CD48-	38.8	33
> > > > > > > >	6-23-22 Kaufman Ruth Panel 3_Standard Chow_SC4_004.fcs/StandardizedEvents/Cells/FSC Singlets/SSC Singlets/Viable/Lineage-/CD201+CD27+/LT-HSC	32.9	28
> > > > > > > >	6-23-22 Kaufman Ruth Panel 3_Standard Chow_SC4_004.fcs/StandardizedEvents/Cells/FSC Singlets/SSC Singlets/Viable/Lineage-/CD201+CD27+/MPPs	17.6	15
> > > > > > > > >	6-23-22 Kaufman Ruth Panel 3_Standard Chow_SC4_004.fcs/StandardizedEvents/Cells/FSC Singlets/SSC Singlets/Viable/Lineage-/CD201+CD27+/MPPs/MPP3	26.7	4
> > > > > > > > >	6-23-22 Kaufman Ruth Panel 3_Standard Chow_SC4_004.fcs/StandardizedEvents/Cells/FSC Singlets/SSC Singlets/Viable/Lineage-/CD201+CD27+/MPPs/MPP4	0	0
> > > > > > > >	6-23-22 Kaufman Ruth Panel 3_Standard Chow_SC4_004.fcs/StandardizedEvents/Cells/FSC Singlets/SSC Singlets/Viable/Lineage-/CD201+CD27+/ST-HSC	3.53	3
	6-23-22 Kaufman Ruth Panel 3_Standard Chow_SC5_005.fcs		3000000
	6-23-22 Kaufman Ruth Panel 3_Standard Chow_SC5_005.fcs/StandardizedEvents
>	6-23-22 Kaufman Ruth Panel 3_Standard Chow_SC5_005.fcs/DownSample-StandardizedEvents
>	6-23-22 Kaufman Ruth Panel 3_Standard Chow_SC5_005.fcs/StandardizedEvents	66.3	1989304
> >	6-23-22 Kaufman Ruth Panel 3_Standard Chow_SC5_005.fcs/StandardizedEvents/Cells	79.6	1583064
> > >	6-23-22 Kaufman Ruth Panel 3_Standard Chow_SC5_005.fcs/StandardizedEvents/Cells/FSC Singlets	78.4	1240970
> > > >	6-23-22 Kaufman Ruth Panel 3_Standard Chow_SC5_005.fcs/StandardizedEvents/Cells/FSC Singlets/SSC Singlets	83.3	1033735
> > > > >	6-23-22 Kaufman Ruth Panel 3_Standard Chow_SC5_005.fcs/StandardizedEvents/Cells/FSC Singlets/SSC Singlets/Viable	94.9	980932
> > > > > >	6-23-22 Kaufman Ruth Panel 3_Standard Chow_SC5_005.fcs/StandardizedEvents/Cells/FSC Singlets/SSC Singlets/Viable/Lineage-	6.14	60275
> > > > > > > >	6-23-22 Kaufman Ruth Panel 3_Standard Chow_SC5_005.fcs/StandardizedEvents/Cells/FSC Singlets/SSC Singlets/Viable/Lineage-/CD201+CD27+/CD150-CD48-	41.6	37
> > > > > > > >	6-23-22 Kaufman Ruth Panel 3_Standard Chow_SC5_005.fcs/StandardizedEvents/Cells/FSC Singlets/SSC Singlets/Viable/Lineage-/CD201+CD27+/LT-HSC	41.6	37
> > > > > > > >	6-23-22 Kaufman Ruth Panel 3_Standard Chow_SC5_005.fcs/StandardizedEvents/Cells/FSC Singlets/SSC Singlets/Viable/Lineage-/CD201+CD27+/MPPs	8.99	8
> > > > > > > > >	6-23-22 Kaufman Ruth Panel 3_Standard Chow_SC5_005.fcs/StandardizedEvents/Cells/FSC Singlets/SSC Singlets/Viable/Lineage-/CD201+CD27+/MPPs/MPP3	12.5	1
> > > > > > > > >	6-23-22 Kaufman Ruth Panel 3_Standard Chow_SC5_005.fcs/StandardizedEvents/Cells/FSC Singlets/SSC Singlets/Viable/Lineage-/CD201+CD27+/MPPs/MPP4	0	0
> > > > > > > >	6-23-22 Kaufman Ruth Panel 3_Standard Chow_SC5_005.fcs/StandardizedEvents/Cells/FSC Singlets/SSC Singlets/Viable/Lineage-/CD201+CD27+/ST-HSC	3.37	3
	6-23-22 Kaufman Ruth Panel 3_Western Diet_WD1_006.fcs		2924634
	6-23-22 Kaufman Ruth Panel 3_Western Diet_WD1_006.fcs/StandardizedEvents
>	6-23-22 Kaufman Ruth Panel 3_Western Diet_WD1_006.fcs/DownSample-StandardizedEvents
>	6-23-22 Kaufman Ruth Panel 3_Western Diet_WD1_006.fcs/StandardizedEvents	68	1989304
> >	6-23-22 Kaufman Ruth Panel 3_Western Diet_WD1_006.fcs/StandardizedEvents/Cells	82	1631965
> > >	6-23-22 Kaufman Ruth Panel 3_Western Diet_WD1_006.fcs/StandardizedEvents/Cells/FSC Singlets	83.1	1355996
> > > >	6-23-22 Kaufman Ruth Panel 3_Western Diet_WD1_006.fcs/StandardizedEvents/Cells/FSC Singlets/SSC Singlets	84.2	1141570
> > > > >	6-23-22 Kaufman Ruth Panel 3_Western Diet_WD1_006.fcs/StandardizedEvents/Cells/FSC Singlets/SSC Singlets/Viable	93.5	1067534
> > > > > >	6-23-22 Kaufman Ruth Panel 3_Western Diet_WD1_006.fcs/StandardizedEvents/Cells/FSC Singlets/SSC Singlets/Viable/Lineage-	3.55	37847
> > > > > > > >	6-23-22 Kaufman Ruth Panel 3_Western Diet_WD1_006.fcs/StandardizedEvents/Cells/FSC Singlets/SSC Singlets/Viable/Lineage-/CD201+CD27+/CD150-CD48-	56	70
> > > > > > > >	6-23-22 Kaufman Ruth Panel 3_Western Diet_WD1_006.fcs/StandardizedEvents/Cells/FSC Singlets/SSC Singlets/Viable/Lineage-/CD201+CD27+/LT-HSC	23.2	29
> > > > > > > >	6-23-22 Kaufman Ruth Panel 3_Western Diet_WD1_006.fcs/StandardizedEvents/Cells/FSC Singlets/SSC Singlets/Viable/Lineage-/CD201+CD27+/MPPs	12	15
> > > > > > > > >	6-23-22 Kaufman Ruth Panel 3_Western Diet_WD1_006.fcs/StandardizedEvents/Cells/FSC Singlets/SSC Singlets/Viable/Lineage-/CD201+CD27+/MPPs/MPP3	20	3
> > > > > > > > >	6-23-22 Kaufman Ruth Panel 3_Western Diet_WD1_006.fcs/StandardizedEvents/Cells/FSC Singlets/SSC Singlets/Viable/Lineage-/CD201+CD27+/MPPs/MPP4	6.67	1
> > > > > > > >	6-23-22 Kaufman Ruth Panel 3_Western Diet_WD1_006.fcs/StandardizedEvents/Cells/FSC Singlets/SSC Singlets/Viable/Lineage-/CD201+CD27+/ST-HSC	2.4	3
	6-23-22 Kaufman Ruth Panel 3_Western Diet_WD2_007.fcs		3000000
	6-23-22 Kaufman Ruth Panel 3_Western Diet_WD2_007.fcs/StandardizedEvents
>	6-23-22 Kaufman Ruth Panel 3_Western Diet_WD2_007.fcs/DownSample-StandardizedEvents
>	6-23-22 Kaufman Ruth Panel 3_Western Diet_WD2_007.fcs/StandardizedEvents	66.3	1989304
> >	6-23-22 Kaufman Ruth Panel 3_Western Diet_WD2_007.fcs/StandardizedEvents/Cells	81.4	1619642
> > >	6-23-22 Kaufman Ruth Panel 3_Western Diet_WD2_007.fcs/StandardizedEvents/Cells/FSC Singlets	82.4	1334552
> > > >	6-23-22 Kaufman Ruth Panel 3_Western Diet_WD2_007.fcs/StandardizedEvents/Cells/FSC Singlets/SSC Singlets	88.3	1178758
> > > > >	6-23-22 Kaufman Ruth Panel 3_Western Diet_WD2_007.fcs/StandardizedEvents/Cells/FSC Singlets/SSC Singlets/Viable	94.1	1109036
> > > > > >	6-23-22 Kaufman Ruth Panel 3_Western Diet_WD2_007.fcs/StandardizedEvents/Cells/FSC Singlets/SSC Singlets/Viable/Lineage-	4.31	47769
> > > > > > > >	6-23-22 Kaufman Ruth Panel 3_Western Diet_WD2_007.fcs/StandardizedEvents/Cells/FSC Singlets/SSC Singlets/Viable/Lineage-/CD201+CD27+/CD150-CD48-	40.7	46
> > > > > > > >	6-23-22 Kaufman Ruth Panel 3_Western Diet_WD2_007.fcs/StandardizedEvents/Cells/FSC Singlets/SSC Singlets/Viable/Lineage-/CD201+CD27+/LT-HSC	34.5	39
> > > > > > > >	6-23-22 Kaufman Ruth Panel 3_Western Diet_WD2_007.fcs/StandardizedEvents/Cells/FSC Singlets/SSC Singlets/Viable/Lineage-/CD201+CD27+/MPPs	16.8	19
> > > > > > > > >	6-23-22 Kaufman Ruth Panel 3_Western Diet_WD2_007.fcs/StandardizedEvents/Cells/FSC Singlets/SSC Singlets/Viable/Lineage-/CD201+CD27+/MPPs/MPP3	15.8	3
> > > > > > > > >	6-23-22 Kaufman Ruth Panel 3_Western Diet_WD2_007.fcs/StandardizedEvents/Cells/FSC Singlets/SSC Singlets/Viable/Lineage-/CD201+CD27+/MPPs/MPP4	0	0
> > > > > > > >	6-23-22 Kaufman Ruth Panel 3_Western Diet_WD2_007.fcs/StandardizedEvents/Cells/FSC Singlets/SSC Singlets/Viable/Lineage-/CD201+CD27+/ST-HSC	4.42	5
	6-23-22 Kaufman Ruth Panel 3_Western Diet_WD3_008.fcs		2759451
	6-23-22 Kaufman Ruth Panel 3_Western Diet_WD3_008.fcs/StandardizedEvents
>	6-23-22 Kaufman Ruth Panel 3_Western Diet_WD3_008.fcs/DownSample-StandardizedEvents
>	6-23-22 Kaufman Ruth Panel 3_Western Diet_WD3_008.fcs/StandardizedEvents	72.1	1989304
> >	6-23-22 Kaufman Ruth Panel 3_Western Diet_WD3_008.fcs/StandardizedEvents/Cells	80	1591267
> > >	6-23-22 Kaufman Ruth Panel 3_Western Diet_WD3_008.fcs/StandardizedEvents/Cells/FSC Singlets	81.2	1292067
> > > >	6-23-22 Kaufman Ruth Panel 3_Western Diet_WD3_008.fcs/StandardizedEvents/Cells/FSC Singlets/SSC Singlets	88.5	1143637
> > > > >	6-23-22 Kaufman Ruth Panel 3_Western Diet_WD3_008.fcs/StandardizedEvents/Cells/FSC Singlets/SSC Singlets/Viable	92.7	1060605
> > > > > >	6-23-22 Kaufman Ruth Panel 3_Western Diet_WD3_008.fcs/StandardizedEvents/Cells/FSC Singlets/SSC Singlets/Viable/Lineage-	2.65	28124
> > > > > > > >	6-23-22 Kaufman Ruth Panel 3_Western Diet_WD3_008.fcs/StandardizedEvents/Cells/FSC Singlets/SSC Singlets/Viable/Lineage-/CD201+CD27+/CD150-CD48-	46.4	32
> > > > > > > >	6-23-22 Kaufman Ruth Panel 3_Western Diet_WD3_008.fcs/StandardizedEvents/Cells/FSC Singlets/SSC Singlets/Viable/Lineage-/CD201+CD27+/LT-HSC	15.9	11
> > > > > > > >	6-23-22 Kaufman Ruth Panel 3_Western Diet_WD3_008.fcs/StandardizedEvents/Cells/FSC Singlets/SSC Singlets/Viable/Lineage-/CD201+CD27+/MPPs	30.4	21
> > > > > > > > >	6-23-22 Kaufman Ruth Panel 3_Western Diet_WD3_008.fcs/StandardizedEvents/Cells/FSC Singlets/SSC Singlets/Viable/Lineage-/CD201+CD27+/MPPs/MPP3	19	4
> > > > > > > > >	6-23-22 Kaufman Ruth Panel 3_Western Diet_WD3_008.fcs/StandardizedEvents/Cells/FSC Singlets/SSC Singlets/Viable/Lineage-/CD201+CD27+/MPPs/MPP4	4.76	1
> > > > > > > >	6-23-22 Kaufman Ruth Panel 3_Western Diet_WD3_008.fcs/StandardizedEvents/Cells/FSC Singlets/SSC Singlets/Viable/Lineage-/CD201+CD27+/ST-HSC	5.8	4
	6-23-22 Kaufman Ruth Panel 3_Western Diet_WD4_009.fcs		3000000
	6-23-22 Kaufman Ruth Panel 3_Western Diet_WD4_009.fcs/StandardizedEvents
>	6-23-22 Kaufman Ruth Panel 3_Western Diet_WD4_009.fcs/DownSample-StandardizedEvents
>	6-23-22 Kaufman Ruth Panel 3_Western Diet_WD4_009.fcs/StandardizedEvents	66.3	1989304
> >	6-23-22 Kaufman Ruth Panel 3_Western Diet_WD4_009.fcs/StandardizedEvents/Cells	81.7	1626228
> > >	6-23-22 Kaufman Ruth Panel 3_Western Diet_WD4_009.fcs/StandardizedEvents/Cells/FSC Singlets	80.2	1304078
> > > >	6-23-22 Kaufman Ruth Panel 3_Western Diet_WD4_009.fcs/StandardizedEvents/Cells/FSC Singlets/SSC Singlets	83.7	1091941
> > > > >	6-23-22 Kaufman Ruth Panel 3_Western Diet_WD4_009.fcs/StandardizedEvents/Cells/FSC Singlets/SSC Singlets/Viable	91.3	996631
> > > > > >	6-23-22 Kaufman Ruth Panel 3_Western Diet_WD4_009.fcs/StandardizedEvents/Cells/FSC Singlets/SSC Singlets/Viable/Lineage-	5.29	52710
> > > > > > > >	6-23-22 Kaufman Ruth Panel 3_Western Diet_WD4_009.fcs/StandardizedEvents/Cells/FSC Singlets/SSC Singlets/Viable/Lineage-/CD201+CD27+/CD150-CD48-	51	73
> > > > > > > >	6-23-22 Kaufman Ruth Panel 3_Western Diet_WD4_009.fcs/StandardizedEvents/Cells/FSC Singlets/SSC Singlets/Viable/Lineage-/CD201+CD27+/LT-HSC	29.4	42
> > > > > > > >	6-23-22 Kaufman Ruth Panel 3_Western Diet_WD4_009.fcs/StandardizedEvents/Cells/FSC Singlets/SSC Singlets/Viable/Lineage-/CD201+CD27+/MPPs	14	20
> > > > > > > > >	6-23-22 Kaufman Ruth Panel 3_Western Diet_WD4_009.fcs/StandardizedEvents/Cells/FSC Singlets/SSC Singlets/Viable/Lineage-/CD201+CD27+/MPPs/MPP3	15	3
> > > > > > > > >	6-23-22 Kaufman Ruth Panel 3_Western Diet_WD4_009.fcs/StandardizedEvents/Cells/FSC Singlets/SSC Singlets/Viable/Lineage-/CD201+CD27+/MPPs/MPP4	5	1
> > > > > > > >	6-23-22 Kaufman Ruth Panel 3_Western Diet_WD4_009.fcs/StandardizedEvents/Cells/FSC Singlets/SSC Singlets/Viable/Lineage-/CD201+CD27+/ST-HSC	2.8	4
	6-23-22 Kaufman Ruth Panel 3_Western Diet_WD5_010.fcs		2611174
	6-23-22 Kaufman Ruth Panel 3_Western Diet_WD5_010.fcs/StandardizedEvents
>	6-23-22 Kaufman Ruth Panel 3_Western Diet_WD5_010.fcs/DownSample-StandardizedEvents
>	6-23-22 Kaufman Ruth Panel 3_Western Diet_WD5_010.fcs/StandardizedEvents	76.2	1989304
> >	6-23-22 Kaufman Ruth Panel 3_Western Diet_WD5_010.fcs/StandardizedEvents/Cells	81.2	1614934
> > >	6-23-22 Kaufman Ruth Panel 3_Western Diet_WD5_010.fcs/StandardizedEvents/Cells/FSC Singlets	82.4	1330799
> > > >	6-23-22 Kaufman Ruth Panel 3_Western Diet_WD5_010.fcs/StandardizedEvents/Cells/FSC Singlets/SSC Singlets	85.7	1140390
> > > > >	6-23-22 Kaufman Ruth Panel 3_Western Diet_WD5_010.fcs/StandardizedEvents/Cells/FSC Singlets/SSC Singlets/Viable	91.9	1048001
> > > > > >	6-23-22 Kaufman Ruth Panel 3_Western Diet_WD5_010.fcs/StandardizedEvents/Cells/FSC Singlets/SSC Singlets/Viable/Lineage-	3.34	34971
> > > > > > > >	6-23-22 Kaufman Ruth Panel 3_Western Diet_WD5_010.fcs/StandardizedEvents/Cells/FSC Singlets/SSC Singlets/Viable/Lineage-/CD201+CD27+/CD150-CD48-	29.6	21
> > > > > > > >	6-23-22 Kaufman Ruth Panel 3_Western Diet_WD5_010.fcs/StandardizedEvents/Cells/FSC Singlets/SSC Singlets/Viable/Lineage-/CD201+CD27+/LT-HSC	36.6	26
> > > > > > > >	6-23-22 Kaufman Ruth Panel 3_Western Diet_WD5_010.fcs/StandardizedEvents/Cells/FSC Singlets/SSC Singlets/Viable/Lineage-/CD201+CD27+/MPPs	18.3	13
> > > > > > > > >	6-23-22 Kaufman Ruth Panel 3_Western Diet_WD5_010.fcs/StandardizedEvents/Cells/FSC Singlets/SSC Singlets/Viable/Lineage-/CD201+CD27+/MPPs/MPP3	30.8	4
> > > > > > > > >	6-23-22 Kaufman Ruth Panel 3_Western Diet_WD5_010.fcs/StandardizedEvents/Cells/FSC Singlets/SSC Singlets/Viable/Lineage-/CD201+CD27+/MPPs/MPP4	15.4	2
> > > > > > > >	6-23-22 Kaufman Ruth Panel 3_Western Diet_WD5_010.fcs/StandardizedEvents/Cells/FSC Singlets/SSC Singlets/Viable/Lineage-/CD201+CD27+/ST-HSC	8.45	6

## Sheet: Fig 2D TNF + STATS
Balb/c mice, BMDMs, 4.16.2021 - 4.21.2021
Software Version	3.10.06
Experiment File Path:
Protocol File Path:
Plate Number	Plate 2
Date	2022-04-14
Time	19:18:35
Reader Type:	Synergy HTX
Reader Serial Number:	2009032
Reading Type	Reader
Procedure Details
Plate Type	96 WELL PLATE (Use plate lid)
Eject plate on completion
Read	Absorbance Endpoint
	Full Plate
	Wavelengths: 450
	Read Speed: Normal, Delay: 100 msec, Measurements/Data Point: 8
Layout
		1	2	3	4	5	6	7	8	9	10	11	12
	A	STD1	STD1	SPL1	SPL7	SPL13								Well ID
		1000	1000											Conc/Dil
	B	STD2	STD2	SPL2	SPL8	SPL14								Well ID
		500	500											Conc/Dil
	C	STD3	STD3	SPL3	SPL9	SPL15								Well ID
		250	250											Conc/Dil
	D	STD4	STD4	SPL4	SPL10	SPL16								Well ID
		125	125											Conc/Dil
	E	STD5	STD5	SPL5	SPL11	SPL17								Well ID
		62.5	62.5											Conc/Dil
	F	STD6	STD6	SPL6	SPL12	SPL18								Well ID
		31.3	31.3											Conc/Dil
	G	STD7	STD7											Well ID
		15.6	15.6											Conc/Dil
	H	BLK	BLK											Well ID
														Conc/Dil
Results
Actual Temperature:	20.8
		1	2	3	4	5	6	7	8	9	10	11	12				Blanked 450
	A	3.603	3.512	0.058	0.057	0.057								450				1	2	3	4	5	6	7	8	9
		3.549	3.458	0.004	0.003	0.003								Blank 450			A	3.549	3.458	0.004	0.003	0.003	0	0	0	0
	B	2.832	2.784	0.057	0.059	0.058								450			B	2.778	2.73	0.003	0.005	0.004	0	0	0	0
		2.778	2.73	0.003	0.005	0.004								Blank 450			C	1.554	1.578	0.003	0.144	0.003	0	0	0	0
	C	1.608	1.632	0.057	0.198	0.057								450			D	0.927	0.737	0.384	0.836	1.464		0	0	0
		1.554	1.578	0.003	0.144	0.003								Blank 450			E	0.598	0.504	0.479	0.827	1.303		0	0	0
	D	0.981	0.791	0.439	0.89	1.518								450			F	0.322	0.166	0.423	0.525	0.855		0	0	0
		0.927	0.737	0.384	0.836	1.464								Blank 450			G	0.152	0.129	0	0	0	0	0	0
	E	0.652	0.558	0.533	0.881	1.357								450			H	0	0	0	0	0	0	0	0
		0.598	0.504	0.479	0.827	1.303								Blank 450
	F	0.377	0.22	0.477	0.579	0.909								450
		0.322	0.166	0.423	0.525	0.855								Blank 450			Average Absorbance			SC N	0.004	WD N	0.003	KD N	0.003
	G	0.206	0.183											450			Standards			SC N	0.003	WD N	0.005	KD N	0.004
		0.152	0.129											Blank 450		TNF	1000	3.5035		SC N	0.003	WD N	0.144	KD N	0.003
	H	0.054	0.054											450			500	2.754		SC L	0.384	WD L	0.836	KD L	1.464
		0	0											Blank 450			250	1.566		SC L	0.479	WD L	0.827	KD L	1.303
																	125	0.832		SC L	0.423	WD L	0.525	KD L	0.855
Table Analyzed	TNF BMDM SC WD KD 4.16.22																62.5	0.551
																	31.3	0.244
Column D	WD L																15.7	0.1405
vs.	vs.
Column B	SC L
Unpaired t test
P value	0.0495
P value summary	*
Significantly different (P < 0.05)?	Yes
One- or two-tailed P value?	Two-tailed
t, df	t=2.787, df=4
Table Analyzed	TNF BMDM SC WD KD 4.16.22
Column F	KD L
vs.	vs.
Column B	SC L
Unpaired t test
P value	0.0168
P value summary	*
Significantly different (P < 0.05)?	Yes
One- or two-tailed P value?	Two-tailed
t, df	t=3.953, df=4
Table Analyzed	TNF BMDM SC WD KD 4.16.22
Column B	SC L
vs.	vs.
Column A	SC N
Unpaired t test
P value	0.0002
P value summary	***
Significantly different (P < 0.05)?	Yes
One- or two-tailed P value?	Two-tailed
t, df	t=12.91, df=4
Table Analyzed	TNF BMDM SC WD KD 4.16.22
Column D	WD L
vs.	vs.
Column C	WD N
Unpaired t test
P value	0.0053
P value summary	**
Significantly different (P < 0.05)?	Yes
One- or two-tailed P value?	Two-tailed
t, df	t=5.522, df=4
Table Analyzed	TNF BMDM SC WD KD 4.16.22
Column F	KD L
vs.	vs.
Column E	KD N
Unpaired t test
P value	0.0051
P value summary	**
Significantly different (P < 0.05)?	Yes
One- or two-tailed P value?	Two-tailed
t, df	t=5.562, df=4

## Sheet: Fig 2E IL-6 LPS-treated + STATS
Balb/c mice, BMDMs, 4.16.2021 - 4.21.2021
Software Version	3.10.06
Experiment File Path:
Protocol File Path:
Plate Number	Plate 2
Date	2022-04-19
Time	19:13:43
Reader Type:	Synergy HTX
Reader Serial Number:	2009032
Reading Type	Reader
Procedure Details
Plate Type	96 WELL PLATE (Use plate lid)
Eject plate on completion
Read	Absorbance Endpoint
	Full Plate
	Wavelengths: 450
	Read Speed: Normal, Delay: 100 msec, Measurements/Data Point: 8
Layout
		1	2	3	4	5	6	7	8	9	10	11	12
	A	STD1	STD1	SPL1	SPL7	SPL13								Well ID
		1000	1000											Conc/Dil
	B	STD2	STD2	SPL2	SPL8	SPL14								Well ID
		500	500											Conc/Dil
	C	STD3	STD3	SPL3	SPL9	SPL15								Well ID
		250	250											Conc/Dil
	D	STD4	STD4	SPL4	SPL10	SPL16								Well ID
		125	125											Conc/Dil
	E	STD5	STD5	SPL5	SPL11	SPL17								Well ID
		62.5	62.5											Conc/Dil
	F	STD6	STD6	SPL6	SPL12	SPL18								Well ID
		31.3	31.3											Conc/Dil
	G	STD7	STD7											Well ID
		15.7	15.7											Conc/Dil
	H	BLK	BLK											Well ID
														Conc/Dil
Results
Actual Temperature:	21
		1	2	3	4	5	6	7	8	9	10	11	12				Blanked 450
	A	1.684	2.113	0.07	0.07	0.071								450				1	2	3	4	5	6	7	8	9
		1.616	2.045	0.001	0.002	0.002								Blank 450			A	1.616	2.045				0	0	0	0
	B	1.109	1.52	0.076	0.073	0.073								450			B	1.04	1.452				0	0	0	0
		1.04	1.452	0.008	0.005	0.005								Blank 450			C	0.685	0.646				0	0	0	0
	C	0.753	0.714	0.068	0.074	0.072								450			D	0.489	0.366	0.743	0.72	1.062		0	0	0
		0.685	0.646	0	0.006	0.004								Blank 450			E	0.298	0.225	0.959	0.882	1.002		0	0	0
	D	0.557	0.435	0.811	0.789	1.13								450			F	0.147	0.122	0.777	0.857	1.144		0	0	0
		0.489	0.366	0.743	0.72	1.062								Blank 450			G	0.075	0.054	0	0	0	0	0	0
	E	0.367	0.293	1.027	0.95	1.07								450			H	0	0	0	0	0	0	0	0
		0.298	0.225	0.959	0.882	1.002								Blank 450
	F	0.215	0.19	0.845	0.925	1.212								450
		0.147	0.122	0.777	0.857	1.144								Blank 450			Average Absorbance
	G	0.144	0.122											450			Standards
		0.075	0.054											Blank 450		IL-6	1000	1.8305
	H	0.068	0.068											450			500	1.246		SC L	0.743	WD L	0.72	KD L	1.062
		0	0											Blank 450			250	0.6655		SC L	0.959	WD L	0.882	KD L	1.002
																	125	0.4275		SC L	0.777	WD L	0.857	KD L	1.144
Table Analyzed	IL-6 BMDM SC WD KD 4.21.22																62.5	0.2615
																	31.3	0.1345
Column F	KD L																15.7	0.0645
vs.	vs.
Column B	SC L
Unpaired t test
P value	0.0361
P value summary	*
Significantly different (P < 0.05)?	Yes
One- or two-tailed P value?	Two-tailed
t, df	t=3.104, df=4
