# Supplementary material for: Enriched dietary saturated fatty acids induce trained immunity via ceramide production that enhances severity of endotoxemia and clearance of infection
Source: eLife. 2022 Oct 20;11:e76744. doi: 10.7554/eLife.76744 (PMC9642993; doi:10.7554/eLife.76744)
Supplement: Figure 3—figure supplement 1—source data 1. [file elife-76744-fig3-figsupp1-data1.xlsx]

## Sheet: Figure 3S1A
	sphingosine d17:1	sphinganine d17:0	sphingosine d18:1	CH3sphinganine d18:0	sphingosine d20:1	Cer(d40:1)	Cer(d42:1)	Cer(d42:2)	SM(d32:1)	SM(d34:1)	SM(d36:1)	SM(d38:1)	SM(d40:1)	SM(d42:1)	SM(d32:2)	SM(d34:2)	SM(d36:2)	SM(d38:2)	SM(d40:2)A	SM(d42:2)A	HexCer(d40:1) [M+H]+	HexCer(d42:1) [M+H]+	HexCer(d42:2) [M+H]+	SM(d32:0)	SM(d33:1)	SM(d34:0)	SM(d36:0)	SM(d36:3)	SM(d39:1)	SM(d40:0)	SM(d41:1)	SM(d41:2)A	SM(d43:1)	SM(d43:2)	SM(d40:2)B	SM(d41:2)B	d18:1-18:1(d9) SM	Diet	Time
KD1	15904	2153286	7602	1136735	7456	8694	9853	5993	105332	3756319	1041645	112658	270265	185662	10831	225044	1050497	75700	62532	540253	10494	5429	4227	8772	252764	193063	68477	20488	39147	8458	212638	44836	14206	11466	138519	52309	1246633	KD	14
KD2	23417	1833044	6507	1141260	5570	7604	8346	4357	95729	3030479	924379	83000	216495	143096	6953	179065	941183	54406	37933	414302	10766	7168	5383	5879	214176	154674	57050	13525	30644	6168	166777	30767	8885	10179	91604	37221	1326230	KD	14
KD3	18676	2309588	8615	1093802	5520	7717	9466	7610	111056	3441299	1122205	94392	247118	180589	9294	200495	1022081	71256	38626	453543	9499	7377	5430	6016	234113	186483	66202	13031	31990	6695	184201	32065	11681	13273	107572	45649	1020343	KD	14
SC1	21258	2345418	5325	1156009	5087	3181	2934	3480	44947	1415946	224571	40020	107090	86964	4478	110698	295648	28035	26628	359399	3987	2598	4495	3640	82053	82861	21512	6290	9201	4004	85226	20053	6602	8396	34918	21072	1381253	SC	14
SC2	30401	3551165	2098	1411552	2775	3247	5897	6085	47247	1628933	259754	48742	130700	110114	2703	116384	342437	37547	34633	462536	6734	3625	5496	3472	84874	105965	20522	8731	10693	3382	89196	19913	7773	8365	38188	20725	1342331	SC	14
SC3	22160	2554658	8556	1135512	6113	4549	6622	5985	66046	2124835	402334	56634	164956	142185	4526	149592	459301	67014	49271	577353	5994	3050	5083	5925	111661	123819	30004	11307	16759	5448	112379	28002	8759	9417	53938	29441	1234081	SC	14

## Sheet: Figure 3 S1B
	KD1	KD2	KD3	SC1	SC2	SC3
sphingosine d17:1	15904	23417	18676	21258	30401	22160
sphinganine d17:0	2153286	1833044	2309588	2345418	3551165	2554658
sphingosine d18:1	7602	6507	8615	5325	2098	8556
CH3sphinganine d18:0	1136735	1141260	1093802	1156009	1411552	1135512
sphingosine d20:1	7456	5570	5520	5087	2775	6113
Cer(d40:1)	8694	7604	7717	3181	3247	4549
Cer(d42:1)	9853	8346	9466	2934	5897	6622
Cer(d42:2)	5993	4357	7610	3480	6085	5985
SM(d32:1)	105332	95729	111056	44947	47247	66046
SM(d34:1)	3756319	3030479	3441299	1415946	1628933	2124835
SM(d36:1)	1041645	924379	1122205	224571	259754	402334
SM(d38:1)	112658	83000	94392	40020	48742	56634
SM(d40:1)	270265	216495	247118	107090	130700	164956
SM(d42:1)	185662	143096	180589	86964	110114	142185
SM(d32:2)	10831	6953	9294	4478	2703	4526
SM(d34:2)	225044	179065	200495	110698	116384	149592
SM(d36:2)	1050497	941183	1022081	295648	342437	459301
SM(d38:2)	75700	54406	71256	28035	37547	67014
SM(d40:2)A	62532	37933	38626	26628	34633	49271
SM(d42:2)A	540253	414302	453543	359399	462536	577353
HexCer(d40:1) [M+H]+	10494	10766	9499	3987	6734	5994
HexCer(d42:1) [M+H]+	5429	7168	7377	2598	3625	3050
HexCer(d42:2) [M+H]+	4227	5383	5430	4495	5496	5083
SM(d32:0)	8772	5879	6016	3640	3472	5925
SM(d33:1)	252764	214176	234113	82053	84874	111661
SM(d34:0)	193063	154674	186483	82861	105965	123819
SM(d36:0)	68477	57050	66202	21512	20522	30004
SM(d36:3)	20488	13525	13031	6290	8731	11307
SM(d39:1)	39147	30644	31990	9201	10693	16759
SM(d40:0)	8458	6168	6695	4004	3382	5448
SM(d41:1)	212638	166777	184201	85226	89196	112379
SM(d41:2)A	44836	30767	32065	20053	19913	28002
SM(d43:1)	14206	8885	11681	6602	7773	8759
SM(d43:2)	11466	10179	13273	8396	8365	9417
SM(d40:2)B	138519	91604	107572	34918	38188	53938
SM(d41:2)B	52309	37221	45649	21072	20725	29441
d18:1-18:1(d9) SM	1246633	1326230	1020343	1381253	1342331	1234081
	P value	Mean of KD	Mean of SC	Difference	SE of difference	t ratio	df
SM(d36:2)	0.000403597	1004587	365795	638792	58656.3	10.8904	4
SM(d33:1)	0.00064611	233684	92862.7	140822	14599.3	9.64578	4
SM(d36:1)	0.000749739	1029410	295553	733857	79072	9.28086	4
SM(d36:0)	0.000980486	63909.7	24012.7	39897	4609.85	8.65472	4
Cer(d40:1)	0.00152669	8005	3659	4346	564.032	7.70523	4
SM(d32:1)	0.00309829	104039	52746.7	51292.3	8040.73	6.37907	4
SM(d39:1)	0.00346455	33927	12217.7	21709.3	3507.78	6.18891	4
SM(d41:1)	0.00430767	187872	95600.3	92271.7	15821.9	5.83189	4
SM(d34:1)	0.00475527	3409366	1723238	1686128	297084	5.67559	4
HexCer(d42:1) [M+H]+	0.00649199	6658	3091	3567	685.248	5.20542	4
HexCer(d40:1) [M+H]+	0.00667838	10253	5571.67	4681.33	906.488	5.16425	4
SM(d38:1)	0.00816128	96683.3	48465.3	48218	9880.97	4.87989	4
SM(d40:1)	0.00853075	244626	134249	110377	22905.8	4.81876	4
SM(d40:2)B	0.00937583	112565	42348	70217	14970.8	4.69028	4
SM(d34:0)	0.0116403	178073	104215	73858.3	16764.6	4.40561	4
SM(d34:2)	0.0134356	201535	125558	75976.7	17987.4	4.22389	4
SM(d41:2)B	0.0149932	45059.7	23746	21313.7	5213.04	4.08853	4
SM(d32:2)	0.0159707	9026	3902.33	5123.67	1277.1	4.01195	4
Cer(d42:1)	0.0285756	9221.67	5151	4070.67	1215.22	3.34974	4
SM(d40:0)	0.0376053	7107	4278	2829	924.072	3.06145	4
SM(d43:2)	0.0387945	11639.3	8726	2913.33	961.612	3.02963	4

## Sheet: Figure 3 S1C
	KD1	KD2	KD3	SC1	SC2	SC3
TG(12:0_16:0_18:2)	1540726	631158	622548	49176	76561	104719
TG(14:0_16:0_18:2)	4387723	2022442	1973997	210169	351666	420626
TG(14:0_16:0_18:1)	17021187	9200424	9106524	469791	796198	981369
TG(15:0_16:0_18:2)	405867	571727	560191	835863	700806	621831
TG(14:0_18:1_18:2) & TG(16:0_16:1_18:2)	2610460	1250134	1276287	578110	765951	757541
TG(16:0_16:1_18:1) & TG(16:0_16:0_18:2)	11040184	5592847	6511717	1893774	2934368	3181564
TG(16:0_16:0_18:1)	22433586	14225865	12935736	1003765	1729350	2004058
TG(16:0_17:0_18:2) & TG(16:0_17:1_18:1)	1277070	511796	608909	88158	120675	155820
TG(16:0_18:2_18:3)	157333	63051	92429	157543	180028	134548
TG(16:0_18:2_18:2)	2084520	1014476	1212234	1783301	2008578	1567815
TG(16:0_18:1_18:2)	8171267	3867657	5288834	5318124	6601604	6167105
TG(16:0_18:1_18:1)	16652901	9573634	10935241	4663309	7035531	10609921
TG(18:2_18:2_18:2)	330460	157392	192888	225179	263472	228124
TG(18:1_18:2_18:2)	968262	460529	545804	1175468	1275271	1063950
TG(18:0_18:1_18:2)	4684415	2403374	2896414	2414515	3317229	4293352
TG(18:0_18:1_18:1)	4901718	2330601	2872846	255689	366815	525524
TG(18:0_18:3_20:2)	259491	138229	170014	67919	125149	124926
TG(12:0_12:0_16:0)	1460880	714945	613611	16332	18925	28530
TG(10:0_12:0_18:1)	465829	220388	191753	7502	7527	11765
TG(12:0_16:0_16:0)	7486638	4091840	3558351	78286	104249	181757
TG(12:0_16:0_18:1) & TG(14:0_14:0_18:1)	7682552	3701045	3473576	111927	176789	252204
TG(14:0_16:0_18:0)	12635812	9066037	7243000	234778	406757	483234
TG(14:0_18:2_18:2)	285047	119187	137132	84872	109834	108377
TG(16:0_18:0_18:0)	2471293	1275051	1109161	28520	42040	40996
TG(16:0_18:0_18:1)	11991251	6782249	6677321	174129	313941	452229
TG(16:0_18:3_18:3)	120070	65694	70632	12104	16714	15241
TG(18:0_18:0_18:1)	2304664	942781	1053398	45239	53899	65700
TG(18:1_18:1_18:2)	2620939	1152165	1517619	2318859	2680358	2661355
TG(16:0_18:1_22:1) & TG(18:0_18:1_20:1)	582830	183595	280839	41395	38253	41267
TG(18:1_18:1_20:1)	586739	229414	336621	96653	125759	176967
TG(18:1_18:2_20:1)	398590	171654	252092	268884	313286	357631
TG(16:0_18:1_22:5) & TG(18:1_18:1_20:4)	447519	237893	293296	353494	531767	471735
TG(16:0_18:2_22:5) & TG(18:1_18:2_20:4)	1796373	1106067	1427679	1424199	1335298	1393618
TG(18:2_18:2_20:4)	473599	226783	281208	610630	450851	324775
TG(18:2_18:3_20:4)	50213	25586	29532	74716	52497	39625
TG(18:1_18:1_22:6) & TG(18:1_20:3_20:4)	772531	418817	489301	864829	709206	768761
TG(18:1_18:2_22:6) & TG(18:1_20:4_20:4)	281487	129749	147037	384509	273815	219953
TG(18:2_20:4_20:4)	73911	32348	30763	86227	65671	43839
TG(16:0_18:0_22:1) & TG(16:0_16:0_24:1)	229916	69967	111834	18036	15408	13020
TG(18:1_20:1_22:1) & TG(18:1_18:1_24:1)	17065	4777	8622	5525	3223	2941
TG(18:1_18:3_22:1)	79761	32393	41331	21347	26309	34078
TG(18:1_18:2_22:1)	57461	17710	23291	15736	15865	17182
TG(18:1_18:1_22:1)	92217	22113	37008	19491	14872	11762
TG(16:0_18:1_24:1) & TG(18:0_18:1_22:1)	85519	22463	33790	17815	10567	9880
TG(18:0_18:1_22:0) & TG(16:0_18:1_24:0)	73381	20205	36507	9203	6467	5430
TG(18:0_18:1_24:1)	25610	8443	17149	7335	3994	4773
TG(18:1_22:0_22:1) & TG(16:0_22:1_24:1)	17830	4583	7607	4761	2594	2916
TG(14:0_18:2_18:3)	28171	15233	14773	13616	15301	15325
TG(16:0_16:0_17:0) & TG(15:0_16:0_18:0)	1826665	985357	848095	30350	34792	44767
TG(16:0_18:0_20:0)	280097	125748	143018	11133	10634	14220
TG(18:0_18:1_24:0)	42287	11824	16471	5790	3362	2255
TG(12:0_12:0_18:2)	237666	101854	111120	7765	9216	16171
TG(12:0_14:0_18:1) & TG(12:0_16:0_16:1)	3185130	1333620	1214754	40687	46547	76913
TG(14:0_16:0_16:0) & TG(12:0_16:0_18:0)	13440839	8211791	7373176	193559	282182	425135
TG(12:0_16:1_18:2)	303852	137581	133118	20404	27444	40231
TAG 58:11	20529	7832	11612	21916	15568	13248
TG(18:0_22:0_22:1) & TG(16:0_22:0_24:1)	20489	7504	14444	3080	2119	560
TG(12:0_14:0_16:0)	3198458	1455396	1259038	32051	28082	51191
TG(12:0_12:0_18:1)	1187510	539535	504401	18129	17574	34008
TG(12:0_14:0_18:2) & TG(10:0_16:0_18:2)	633242	286034	276297	22070	28255	39708
TG(12:0_18:1_18:2)	647694	286740	273745	61998	85596	101259
TG(12:0_18:2_18:2)	73691	38747	39415	13632	17212	22878
TG(15:0_16:0_18:1)	2588310	1165972	1190047	45915	59192	105156
TG(16:0_16:0_18:0)	8409872	5621163	4866020	78467	120360	180317
TG(16:0_17:0_18:1)	2003773	913503	953194	49758	64975	80200
TG(16:0_17:1_18:2) & TG(15:0_18:1_18:2)	431515	207412	244322	87373	115128	120088
TG(16:1_17:1_18:2) & TG(15:0_18:2_18:2)	66923	35554	35742	19102	29875	23018
TG(17:0_18:1_18:1)	822886	329906	407573	60690	84897	94870
TG(17:0_18:1_18:2)	386409	150641	200838	78595	95912	118169
TG(17:0_18:2_18:2) & TG(17:1_18:1_18:2)	164552	82112	102596	57444	75722	78888
TG(10:0_18:2_18:2)	41422	19248	16423	5724	7539	11847
TG(16:0_18:1_20:4)	706561	384061	524147	228809	404259	438798
TG(16:0_18:2_20:4)	77304	31843	41465	125996	134540	107968
TG(18:2_18:2_18:3)	200386	81931	120134	14606	16929	14345
TG(18:2_18:3_18:3)	31389	17767	19205	28825	25688	19483
TG(16:0_18:1_21:0)	114960	41828	56365	14037	10281	6141
TG(18:0_18:1_19:1)	161191	52788	76110	18680	15733	13801
TG(18:1_18:1_19:1)	123839	42828	61917	24408	28874	34905
TG(16:0_18:0_22:0) & TG(16:0_16:0_24:0)	63940	27526	33345	4980	5333	5078
TG(16:0_18:1_22:6)	1796373	1106067	1427679	1424199	1335298	1393618
TG(16:0_18:2_22:6)	473599	226783	281208	610630	450851	324775
TG(16:0_18:1_23:0)	42209	12481	24618	8046	4041	2930
TG(16:0_18:0_24:0)	23865	10119	12145	3186	2517	1485
TG(14:0_17:1_18:2) & TG(15:0_16:1_18:2)	124256	60180	65812	14590	21211	23619
TG(17:0_18:0_18:1) & TG(16:0_18:1_19:0)	546685	206611	234389	18802	19861	19778
15:0-18:1(d7)-15:0 TAG	1699717	1876223	1878157	2167557	2171700	2036141
	P value	Mean of KD	Mean of SC	Difference	SE of difference	t ratio	df
TG(14:0_16:0_18:0)	0.00426188	9648283	374923	9273360	1585461	5.849	4
TG(16:0_16:0_18:0)	0.00460661	6299018	126381	6172637	1078109	5.72543	4
TG(16:0_16:0_18:1)	0.0074792	16531729	1579058	14952671	2989266	5.00212	4
TG(14:0_16:0_16:0) & TG(12:0_16:0_18:0)	0.00784172	9675269	300292	9374977	1899483	4.93554	4
TG(16:0_18:0_18:1)	0.00964031	8483607	313433	8170174	1755920	4.65293	4
TG(16:0_18:2_20:4)	0.0102657	50204	122835	-72630.7	15895.1	4.56936	4
TG(14:0_16:0_18:1)	0.0137225	11776045	749119	11026926	2626971	4.19758	4
15:0-18:1(d7)-15:0 TAG	0.0142833	1818032	2125133	-307100	74035.5	4.14802	4
TG(16:0_18:3_18:3)	0.0152924	85465.3	14686.3	70779	17414.1	4.06447	4
TG(12:0_16:0_16:0)	0.01611	5045610	121431	4924179	1230585	4.0015	4
TG(16:0_16:0_17:0) & TG(15:0_16:0_18:0)	0.0180189	1220039	36636.3	1183403	305920	3.86834	4
TG(18:0_18:1_18:1)	0.0191574	3368388	382676	2985712	786389	3.79674	4
TG(16:0_18:0_18:0)	0.0211073	1618502	37185.3	1581316	429098	3.68521	4
TG(16:0_18:0_20:0)	0.0248866	182954	11995.7	170959	48839.4	3.50043	4
TG(12:0_16:0_18:1) & TG(14:0_14:0_18:1)	0.0251171	4952391	180307	4772084	1367260	3.49025	4
TG(16:0_17:0_18:1)	0.0265135	1290157	64977.7	1225179	357100	3.43091	4
TG(18:2_18:2_18:3)	0.0271736	134150	15293.3	118857	34915.4	3.40414	4
TG(12:0_12:0_16:0)	0.02726	929812	21262.3	908550	267166	3.40069	4
TG(15:0_16:0_18:1)	0.0284637	1648110	70087.7	1578022	470494	3.35397	4
TG(10:0_12:0_18:1)	0.0310359	292657	8931.33	283725	86991.4	3.26153	4
TG(12:0_12:0_18:1)	0.0315621	743815	23237	720578	222144	3.24374	4
TG(16:0_18:0_22:0) & TG(16:0_16:0_24:0)	0.0319949	41603.7	5130.33	36473.3	11294.3	3.22936	4
TG(18:0_22:0_22:1) & TG(16:0_22:0_24:1)	0.0329526	14145.7	1919.67	12226	3822.59	3.19835	4
TG(12:0_12:0_18:2)	0.0338225	150213	11050.7	139163	43884.8	3.17109	4
TG(18:0_18:0_18:1)	0.0342903	1433614	54946	1378668	436734	3.15677	4
TG(12:0_14:0_16:0)	0.0349372	1970964	37108	1933856	616400	3.13734	4
TG(12:0_14:0_18:2) & TG(10:0_16:0_18:2)	0.0349782	398524	30011	368513	117506	3.13612	4
TG(14:0_16:0_18:2)	0.0366529	2794721	327487	2467234	799029	3.08779	4
TG(14:0_17:1_18:2) & TG(15:0_16:1_18:2)	0.0369816	83416	19806.7	63609.3	20661.7	3.07861	4
TG(18:1_18:2_18:2)	0.0380997	658198	1171563	-513365	168422	3.04808	4
TG(16:0_18:0_24:0)	0.0395642	15376.3	2396	12980.3	4312.91	3.00965	4
TG(16:0_16:1_18:1) & TG(16:0_16:0_18:2)	0.0433554	7714916	2669902	5045014	1729277	2.91741	4
TG(12:0_14:0_18:1) & TG(12:0_16:0_16:1)	0.0436876	1911168	54715.7	1856452	638003	2.90978	4
TG(12:0_16:1_18:2)	0.0454229	191517	29359.7	162157	56481.2	2.871	4
TG(17:0_18:1_18:1)	0.0455288	520122	80152.3	439969	153370	2.86869	4
TG(17:0_18:0_18:1) & TG(16:0_18:1_19:0)	0.0468157	329228	19480.3	309748	109024	2.8411	4
TG(16:0_17:0_18:2) & TG(16:0_17:1_18:1)	0.0484087	799258	121551	677707	241337	2.80814	4
TG(12:0_16:0_18:2)	0.0487299	931477	76818.7	854659	305056	2.80164	4

## Sheet: Figures 3 S1D
	KD1	KD2	KD3	SC1	SC2	SC3
PC(16:0_16:0)	1852545	1751583	2759832	805270	1156639	1626478
PC(16:0_16:1)	1409655	1039413	1343642	610745	689343	1103948
PC(16:0_18:1)	33164462	24930941	28869520	9955356	12539311	19520661
PC(16:0_18:2)	56780736	52007798	50219498	28050038	26907680	35606814
PC(16:1_18:2)	324147	265410	287508	222091	193247	245149
PC(14:0_20:4)	46605	34355	37277	10995	10869	17974
PC(18:0_18:1)	8191626	5638252	7107126	644099	802064	1301272
PC(18:1_18:1)	53387579	42046625	44374215	7970999	7715740	12588516
PC(18:1_18:2)	11788068	9209414	9895057	2508708	2430748	3248291
PC(18:2_18:2)	43866401	39633269	39599727	17275998	20243408	29398846
PC(18:2_18:3)A	37950	36038	40283	63123	81244	119118
PC(18:3_18:3)	18887	14099	12288	7459	6359	7751
PC 37:4	312570	333807	307258	93865	93956	134587
PC 37:5	131395	91505	126957	42862	53130	46750
PC 37:6	43844	30894	30899	11842	10194	11682
PC(18:0_20:3)	3711617	2697044	3260624	495929	461508	749236
PC(18:1_20:3)	24810717	26518721	24981666	6224200	6616844	11634180
PC(18:1_20:4)	1696603	2001445	1680110	2463005	2883102	4601570
PC(18:2_20:4)	22966074	17669025	17359218	10278098	9896135	12955574
PC(16:1_22:6)	40276	24187	38719	48606	41155	50954
PC(18:0_22:5)A	216188	177690	181186	106644	119317	188616
PC(18:0_22:6)	5519596	4775492	4930258	1301532	1278672	2016922
PC(18:2_22:5)	2232764	1899599	1922109	2531977	2535773	3654558
PC(20:4_20:4)	59941	50672	43556	48079	52508	48934
PC 42:8	19572	9806	14924	22153	19721	28276
PC(14:0_16:0)	683885	515964	790621	83442	93176	183404
PC 30:1	18227	12574	15509	1779	2952	3937
PC 38:1	50292	34636	42851	13604	16440	18745
PC(20:0_18:2)	268305	181879	224189	94076	108633	153373
PC(14:0_14:0)	15851	12584	11962	910	427	1221
PC 31:1	11758	10207	12805	1420	2239	2398
PC 31:0	206978	183638	265602	30843	35173	57661
PC(14:0_18:2)	133096	87482	86404	40804	37684	49365
PC(16:0_18:3)a	488262	369662	420489	131636	138168	133680
PC(16:0_18:3)b	461307	341066	382629	320066	272853	344445
PC(16:0_20:3)	16221240	12552631	14220093	3500456	3015044	4642945
PC(16:0_20:4)	55259752	51564695	53382647	22870277	26392692	37530184
PC(18:2_18:3)B	592069	475129	516194	202492	164447	242360
PC(16:0_22:4)	1204525	833632	1256248	535217	430851	734206
PC(18:0_20:4)	32793915	34582797	33888455	8603159	9307087	15927820
PC(16:0_22:5)	2401435	2312736	1773825	3495709	4047464	6429812
PC(16:0_22:5)B	1391864	2871222	1164902	329988	423684	634326
PC(16:0_22:6)	29972799	23614812	24006724	14108481	13577010	17421536
PC(18:1_20:5)	1111145	1008243	992988	275204	330036	447459
PC(18:0_22:5)B	286016	229755	236359	46442	76716	111281
PC 42:10	64467	61334	62663	26305	31895	40318
PC(p-32:1) / PC(o-32:2)	23727	17366	20328	9363	8519	10207
PC(p-34:0) / PC(o-34:1)	155430	114887	127284	68717	83877	94299
PC(p-34:1) / PC(o-34:2)	140485	93439	97454	33581	39053	49128
PC(p-34:2) / PC(o-34:3)	44878	28690	29459	9396	12718	15611
PC(p-36:1) / PC(o-36:2)A	50582	31769	36411	15959	23813	22326
PC(p-36:4) / PC(o-36:5)	319203	208215	229427	115998	126529	142682
PC(p-36:5) / PC(o-36:6)	30037	21585	10714	5403	6362	7823
PC(p-38:3) / PC(o-38:4)A	78225	54265	62180	15281	25261	20002
PC(p-38:3) / PC(o-38:4)B	150529	133189	128995	47328	55313	65874
PC(p-38:4) / PC(o-38:5)A	361936	243179	292054	134877	166365	186408
PC(p-38:4) / PC(o-38:5)B	44164	35363	28622	63306	43012	54725
PC(p-38:5) / PC(o-38:6)A	361501	269445	292137	156944	137582	181785
PC(p-38:6) / PC(o-38:7)	117799	93888	90327	67318	62728	79030
PC(p-40:3) / PC(o-40:4)	45339	44121	40103	18017	22524	24340
PC(p-40:5) / PC(o-40:6)	162975	124420	136013	55425	47026	55212
PC(p-40:6) / PC(o-40:7)A	133785	92434	95454	88949	77808	101067
PC(p-40:6) / PC(o-40:7)B	78373	72318	66473	37455	32032	36545
PC(p-42:5) / PC(o-42:6)A	58997	39689	42904	24125	22257	21490
15:0-18:1(d7)PC	6928181	7211470	6079563	7196879	7409560	6253392
	P value	Mean of KD	Mean of SC	Difference	SE of difference	t ratio	df
PC 37:4	0.000183788	317878	107469	210409	15799.5	13.3174	4
PC 31:1	0.000298222	11590	2019	9571	813.222	11.7692	4
PC(18:1_20:5)	0.000400427	1037459	350900	686559	62914.9	10.9125	4
PC(18:0_22:6)	0.000436107	5075115	1532375	3542740	331854	10.6756	4
PC(14:0_14:0)	0.000506701	13465.7	852.667	12613	1228.03	10.2709	4
PC(18:1_18:1)	0.000613854	46602806	9425085	37177721	3803553	9.77447	4
PC(p-40:6) / PC(o-40:7)B	0.000634691	72388	35344	37044	3822.75	9.69041	4
PC(p-38:3) / PC(o-38:4)B	0.000665094	137571	56171.7	81399.3	8502.38	9.57371	4
PC(18:1_20:3)	0.000693246	25437035	8158408	17278627	1824292	9.47141	4
PC(18:0_20:4)	0.000713162	33755056	11279355	22475700	2390496	9.40211	4
PC(18:1_18:2)	0.000744278	10297513	2729249	7568264	813924	9.29849	4
PC(16:0_20:3)	0.000806004	14331321	3719482	10611840	1165110	9.10801	4
PC(p-40:3) / PC(o-40:4)	0.000929417	43187.7	21627	21560.7	2456.68	8.77635	4
PC(18:0_20:3)	0.000986705	3223095	568891	2654204	307184	8.64045	4
PC(16:0_18:3)a	0.00106191	426138	134495	291643	34407.3	8.4762	4
PC(18:2_18:3)B	0.00137302	527797	203100	324698	40978.1	7.9237	4
PC(18:0_18:1)	0.00137798	6979001	915812	6063190	765923	7.91619	4
PC(p-40:5) / PC(o-40:6)	0.00165855	141136	52554.3	88581.7	11750.7	7.5384	4
PC 42:10	0.00198725	62821.3	32839.3	29982	4172.63	7.18539	4
PC 30:1	0.00199227	15436.7	2889.33	12547.3	1747.4	7.18058	4
PC 31:0	0.00232431	218739	41225.7	177514	25758.8	6.89138	4
PC(16:0_18:2)	0.00245438	53002677	30188177	22814500	3359180	6.79169	4
PC(18:0_22:5)B	0.00260203	250710	78146.3	172564	25809.2	6.68613	4
PC(14:0_16:0)	0.00321319	663490	120007	543483	86040.9	6.31656	4
PC(14:0_20:4)	0.00395257	39412.3	13279.3	26133	4376.8	5.97079	4
PC(p-38:3) / PC(o-38:4)A	0.004203	64890	20181.3	44708.7	7614.74	5.87133	4
PC(p-32:1) / PC(o-32:2)	0.00427523	20473.7	9363	11110.7	1901.21	5.84399	4
PC 38:1	0.00521736	42593	16263	26330	4759.5	5.5321	4
PC 37:6	0.00527925	35212.3	11239.3	23973	4347.61	5.51406	4
PC(16:0_20:4)	0.00575292	53402365	28931051	24471314	4545119	5.38409	4
PC 37:5	0.00599739	116619	47580.7	69038.3	12972.2	5.32202	4
PC(p-38:5) / PC(o-38:6)A	0.00814611	307694	158770	148924	30501.8	4.88247	4
PC(18:2_18:2)	0.008744	41033132	22306084	18727048	3913765	4.78492	4
PC(16:0_22:6)	0.0104617	25864778	15035676	10829103	2382935	4.54444	4
PC(p-34:1) / PC(o-34:2)	0.0113189	110459	40587.3	69872	15730.9	4.44172	4
PC(p-42:5) / PC(o-42:6)A	0.0151072	47196.7	22624	24572.7	6023.75	4.0793	4
PC(16:0_18:1)	0.0157176	28988308	14005109	14983198	3716786	4.03123	4
PC(18:2_20:4)	0.0157792	19331439	11043269	8288170	2058404	4.0265	4
PC(18:3_18:3)	0.0171882	15091.3	7189.67	7901.67	2013.63	3.9241	4
PC(p-34:2) / PC(o-34:3)	0.0174224	34342.3	12575	21767.3	5569.86	3.90806	4
PC(14:0_18:2)	0.0193656	102327	42617.7	59709.7	15778.7	3.78419	4
PC(p-38:4) / PC(o-38:5)A	0.0221174	299056	162550	136506	37582.6	3.63217	4
PC(p-34:0) / PC(o-34:1)	0.0235673	132534	82297.7	50236	14107.7	3.56089	4
PC(p-36:4) / PC(o-36:5)	0.0237873	252282	128403	123879	34890.2	3.55053	4
PC(20:0_18:2)	0.0258433	224791	118694	106097	30673.5	3.45892	4
PC(16:0_22:4)	0.029403	1098135	566758	531377	160096	3.31911	4
PC(16:1_18:2)	0.0338726	292355	220162	72192.7	22777	3.16954	4
PC(p-38:6) / PC(o-38:7)	0.0351797	100671	69692	30979.3	9897.03	3.13016	4
PC(p-36:1) / PC(o-36:2)A	0.0372425	39587.3	20699.3	18888	6149.66	3.07139	4
PC(18:2_18:3)A	0.039675	38090.3	87828.3	-49738	16541.8	3.0068	4
