# Supplementary material for: Enriched dietary saturated fatty acids induce trained immunity via ceramide production that enhances severity of endotoxemia and clearance of infection
Source: eLife. 2022 Oct 20;11:e76744. doi: 10.7554/eLife.76744 (PMC9642993; doi:10.7554/eLife.76744)
Supplement: Figure 3—figure supplement 2—source data 1. [file elife-76744-fig3-figsupp2-data1.xlsx]

## Sheet: Figure 3S2A-I +STATS
BMDM mRNA exp. 2.22.2020
1mM PA 24 h, LPS 24 h	EtOH	Ctrl	PA-24h	LPS-24h	PA-24h → LPS-24h
TNF	13.7362	11.3149	92.9376	42.2285	404.909
	20.728	11.6517	38.0527	63.868	337.229
	11.5991	5.73457	116.8	46.3826	484.66
IL-6	0.123835	0.125241	2.73957	25.6991	287.389
	0.279931	0.0487614	1.45085	43.0767	79.971
	0.11994	0.0640724	4.02513	38.3276	297.704
IL-1b	7.14168	4.12906	2581.63	2.87731	1018.54
	12.7149	6.22399	5566.71	1.39275	1108.48
	6.18829	3.27587	4807.05	1.47511	1201.42
BMDM mRNA exp. 1.6.2021
0.5mM PA 12 h, LPS 24 h	EtOH	Ctrl	LPS-24h	PA-12h	PA-12h → L-24h
TNF	65.0294	82.3487	250.379	100.768	1483.49
	29.1597	46.1107	131.273	55.6544	1732.5
	57.5471	23.3697	91.0983	76.0555	822.29
IL-6	0.0313752	0	95.3329	8.5641	2550.19
	0.0322653	0.264699	62.8419	5.56987	3818.33
	0.394318	0.0228637	38.0132	7.70493	1834.02
IL-1b	19.3723	15.4796	11992.7	8.50709	18533.5
	7.39425	14.8523	7820.35	7.55713	22815.4
	21.9695	6.00875	5631.1	14.9875	9332.32
0.5mM PA 24 h, LPS 24 h	EtOH	Ctrl	LPS-24h	PA-24h	PA-24h → L-24h
TNF	38.3193	28.4448	142.729	40.5423	269.69
	19.4895	33.2748	54.9294	50.8963	189.852
	29.7089	39.6771	57.2693	24.9655	331.044
IL-6	2.12665	0.475054	47.0058	0.886938	375.452
	8.4305	0	50.6603	0.708132	285.953
	0.116486	0.912668	25.4269	0.583628	730.93
IL-1b	90.9233	19.331	3942.58	2.43781	4002.86
	555.482	2.4052	2604.39	2.85034	2199.25
	7.23646	37.3397	2143.74	1.64538	4503.15
Table Analyzed	Fig S5A tnf
Column E	PA-24h → LPS-24h
vs.	vs.
Column D	LPS-24h
Unpaired t test
P value	0.0011
P value summary	**
Significantly different (P < 0.05)?	Yes
One- or two-tailed P value?	Two-tailed
t, df	t=8.305, df=4
Table Analyzed	Fig S5B il-6
Column E	PA-24h → LPS-24h
vs.	vs.
Column D	LPS-24h
Unpaired t test
P value	0.0591
P value summary	ns
Significantly different (P < 0.05)?	No
One- or two-tailed P value?	Two-tailed
t, df	t=2.615, df=4
Table Analyzed	Fig S5C il-1b
Column E	PA-24h → LPS-24h
vs.	vs.
Column C	LPS-24h
Unpaired t test
P value	0.0232
P value summary	*
Significantly different (P < 0.05)?	Yes
One- or two-tailed P value?	Two-tailed
t, df	t=3.577, df=4
Table Analyzed	Fig S5D tnf
Column E	PA-12h → L-24h
vs.	vs.
Column C	LPS-24h
Unpaired t test
P value	0.0125
P value summary	*
Significantly different (P < 0.05)?	Yes
One- or two-tailed P value?	Two-tailed
t, df	t=4.310, df=4
Table Analyzed	Fig S5E il-6
Column E	PA-12h → L-24h
vs.	vs.
Column C	LPS-24h
Unpaired t test
P value	0.01
P value summary	*
Significantly different (P < 0.05)?	Yes
One- or two-tailed P value?	Two-tailed
t, df	t=4.598, df=4
Table Analyzed	Fig S5F il-1b
Column E	PA-12h → L-24h
vs.	vs.
Column C	LPS-24h
Unpaired t test
P value	0.1281
P value summary	ns
Significantly different (P < 0.05)?	No
One- or two-tailed P value?	Two-tailed
t, df	t=1.915, df=4
Table Analyzed	Fig S5G tnf
Column E	PA-24h → L-24h
vs.	vs.
Column C	LPS-24h
Unpaired t test
P value	0.0234
P value summary	*
Significantly different (P < 0.05)?	Yes
One- or two-tailed P value?	Two-tailed
t, df	t=3.567, df=4
Table Analyzed	Fig S5H il-6
Column E	PA-24h → L-24h
vs.	vs.
Column C	LPS-24h
Unpaired t test
P value	0.0359
P value summary	*
Significantly different (P < 0.05)?	Yes
One- or two-tailed P value?	Two-tailed
t, df	t=3.108, df=4
Table Analyzed	Fig S5I il-1b
Column E	PA-24h → L-24h
vs.	vs.
Column C	LPS-24h
Unpaired t test
P value	0.4895
P value summary	ns
Significantly different (P < 0.05)?	No
One- or two-tailed P value?	Two-tailed
t, df	t=0.7601, df=4

## Sheet: Figure 3S2A, S5B, S5C raw data
	Well	Fluor	Target	Content	Sample	Cq	SQ
	A01	SYBR	B-actin	Unkn	Naïve Ctrl 1	18.0405			24H 1mM PA BMDMs		Normalizer
	A02	SYBR	B-actin	Unkn	Naïve Ctrl 2	17.4266				Sample Name	Actin	TNFalpha	△Ct	△△Ct	RQ
	A03	SYBR	B-actin	Unkn	Naïve Ctrl 3	19.1668				Naïve Ctrl 1	18.0405	26.5404	8.49985	-3.50015	11.3149
	A04	SYBR	B-actin	Unkn	LPS-24h 1	17.0877				Naïve Ctrl 2	17.4266	25.8841	8.45753	-3.54247	11.6517
	A05	SYBR	B-actin	Unkn	LPS-24h 2	17.8352				Naïve Ctrl 3	19.1668	28.6471	9.48032	-2.51968	5.73457
	A06	SYBR	B-actin	Unkn	LPS-24h 3	17.2884				LPS-24h 1	17.0877	23.6875	6.59986	-5.40014	42.2285
	A07	SYBR	B-actin	Unkn	PA-24h 1	22.4493				LPS-24h 2	17.8352	23.8382	6.00298	-5.99702	63.868
	A08	SYBR	B-actin	Unkn	PA-24h 2	21.2706				LPS-24h 3	17.2884	23.7529	6.46449	-5.53551	46.3826
	A09	SYBR	B-actin	Unkn	PA-24h 3	23.1723				PA-24h 1	22.4493	27.9111	5.46181	-6.53819	92.9376
	B07	SYBR	B-actin	Unkn	PA-24h → LPS-24h 1	28.6864				PA-24h 2	21.2706	28.0207	6.75007	-5.24993	38.0527
	B08	SYBR	B-actin	Unkn	PA-24h → LPS-24h 2	27.5958				PA-24h 3	23.1723	28.3044	5.13211	-6.86789	116.8
	B09	SYBR	B-actin	Unkn	PA-24h → LPS-24h 3	28.3516				PA-24h → LPS-24h 1	28.6864	32.0249	3.33855	-8.66145	404.909
	B10	SYBR	B-actin	Unkn	EtOH 1	19.0448				PA-24h → LPS-24h 2	27.5958	31.1982	3.60242	-8.39758	337.229
	B11	SYBR	B-actin	Unkn	EtOH 2	20.2172				PA-24h → LPS-24h 3	28.3516	31.4308	3.07917	-8.92083	484.66
	B12	SYBR	B-actin	Unkn	EtOH 3	19.4891				EtOH 1	19.0448	27.2649	8.22009	-3.77991	13.7362
	C01	SYBR	TNF-alpha	Unkn	Naïve Ctrl 1	26.5404				EtOH 2	20.2172	27.8437	7.62649	-4.37351	20.728
	C02	SYBR	TNF-alpha	Unkn	Naïve Ctrl 2	25.8841				EtOH 3	19.4891	27.9531	8.46406	-3.53594	11.5991
	C03	SYBR	TNF-alpha	Unkn	Naïve Ctrl 3	28.6471
	C04	SYBR	TNF-alpha	Unkn	LPS-24h 1	23.6875
	C05	SYBR	TNF-alpha	Unkn	LPS-24h 2	23.8382				Calibrator	12
	C06	SYBR	TNF-alpha	Unkn	LPS-24h 3	23.7529
	C07	SYBR	TNF-alpha	Unkn	PA-24h 1	27.9111
	C08	SYBR	TNF-alpha	Unkn	PA-24h 2	28.0207					Normalizer
	C09	SYBR	TNF-alpha	Unkn	PA-24h 3	28.3044				Sample Name	Actin	IL-1b	△Ct	△△Ct	RQ
	D07	SYBR	TNF-alpha	Unkn	PA-24h → LPS-24h 1	32.0249				Naïve Ctrl 1	18.0405	27.9947	9.95419	-2.04581	4.12906
	D08	SYBR	TNF-alpha	Unkn	PA-24h → LPS-24h 2	31.1982				Naïve Ctrl 2	17.4266	26.7888	9.36216	-2.63784	6.22399
	D09	SYBR	TNF-alpha	Unkn	PA-24h → LPS-24h 3	31.4308				Naïve Ctrl 3	19.1668	29.4549	10.2881	-1.71188	3.27587
	D10	SYBR	TNF-alpha	Unkn	EtOH 1	27.2649				LPS-24h 1	17.0877	17.7536	0.665933	-11.3341	2581.63
	D11	SYBR	TNF-alpha	Unkn	EtOH 2	27.8437				LPS-24h 2	17.8352	17.3926	-0.442608	-12.4426	5566.71
	D12	SYBR	TNF-alpha	Unkn	EtOH 3	27.9531				LPS-24h 3	17.2884	17.0575	-0.230937	-12.2309	4807.05
	E01	SYBR	IL-1b	Unkn	Naïve Ctrl 1	27.9947				PA-24h 1	22.4493	32.9246	10.4753	-1.52472	2.87731
	E02	SYBR	IL-1b	Unkn	Naïve Ctrl 2	26.7888				PA-24h 2	21.2706	32.7927	11.5221	-0.477932	1.39275
	E03	SYBR	IL-1b	Unkn	Naïve Ctrl 3	29.4549				PA-24h 3	23.1723	34.6115	11.4392	-0.560821	1.47511
	E04	SYBR	IL-1b	Unkn	LPS-24h 1	17.7536				PA-24h → LPS-24h 1	28.6864	30.6941	2.00772	-9.99228	1018.54
	E05	SYBR	IL-1b	Unkn	LPS-24h 2	17.3926				PA-24h → LPS-24h 2	27.5958	29.4814	1.88563	-10.1144	1108.48
	E06	SYBR	IL-1b	Unkn	LPS-24h 3	17.0575				PA-24h → LPS-24h 3	28.3516	30.1211	1.76947	-10.2305	1201.42
	E07	SYBR	IL-1b	Unkn	PA-24h 1	32.9246				EtOH 1	19.0448	28.2085	9.16374	-2.83626	7.14168
	E08	SYBR	IL-1b	Unkn	PA-24h 2	32.7927				EtOH 2	20.2172	28.5487	8.33156	-3.66844	12.7149
	E09	SYBR	IL-1b	Unkn	PA-24h 3	34.6115				EtOH 3	19.4891	28.8595	9.37046	-2.62954	6.18829
	F07	SYBR	IL-1b	Unkn	PA-24h → LPS-24h 1	30.6941
	F08	SYBR	IL-1b	Unkn	PA-24h → LPS-24h 2	29.4814
	F09	SYBR	IL-1b	Unkn	PA-24h → LPS-24h 3	30.1211					Normalizer
	F10	SYBR	IL-1b	Unkn	EtOH 1	28.2085				Sample Name	Actin	IL-6	△Ct	△△Ct	RQ
	F11	SYBR	IL-1b	Unkn	EtOH 2	28.5487				Naïve Ctrl 1	18.0405	33.0377	14.9972	2.99723	0.125241
	F12	SYBR	IL-1b	Unkn	EtOH 3	28.8595				Naïve Ctrl 2	17.4266	33.7847	16.3581	4.35812	0.0487614
	G01	SYBR	IL-6	Unkn	Naïve Ctrl 1	33.0377				Naïve Ctrl 3	19.1668	35.1309	15.9642	3.96415	0.0640724
	G02	SYBR	IL-6	Unkn	Naïve Ctrl 2	33.7847				LPS-24h 1	17.0877	24.404	7.31636	-4.68364	25.6991
	G03	SYBR	IL-6	Unkn	Naïve Ctrl 3	35.1309				LPS-24h 2	17.8352	24.4064	6.57116	-5.42884	43.0767
	G04	SYBR	IL-6	Unkn	LPS-24h 1	24.404				LPS-24h 3	17.2884	24.0281	6.73969	-5.26031	38.3276
	G05	SYBR	IL-6	Unkn	LPS-24h 2	24.4064				PA-24h 1	22.4493	32.9954	10.5461	-1.45395	2.73957
	G06	SYBR	IL-6	Unkn	LPS-24h 3	24.0281				PA-24h 2	21.2706	32.7337	11.4631	-0.536897	1.45085
	G07	SYBR	IL-6	Unkn	PA-24h 1	32.9954				PA-24h 3	23.1723	33.1632	9.99096	-2.00904	4.02513
	G08	SYBR	IL-6	Unkn	PA-24h 2	32.7337				PA-24h → LPS-24h 1	28.6864	32.5195	3.83314	-8.16686	287.389
	G09	SYBR	IL-6	Unkn	PA-24h 3	33.1632				PA-24h → LPS-24h 2	27.5958	33.2744	5.67859	-6.32141	79.971
	H07	SYBR	IL-6	Unkn	PA-24h → LPS-24h 1	32.5195				PA-24h → LPS-24h 3	28.3516	32.1339	3.78227	-8.21773	297.704
	H08	SYBR	IL-6	Unkn	PA-24h → LPS-24h 2	33.2744				EtOH 1	19.0448	34.0583	15.0135	3.01351	0.123835
	H09	SYBR	IL-6	Unkn	PA-24h → LPS-24h 3	32.1339				EtOH 2	20.2172	34.054	13.8369	1.83686	0.279931
	H10	SYBR	IL-6	Unkn	EtOH 1	34.0583				EtOH 3	19.4891	34.5487	15.0596	3.05961	0.11994
	H11	SYBR	IL-6	Unkn	EtOH 2	34.054
	H12	SYBR	IL-6	Unkn	EtOH 3	34.5487

## Sheet: Figure 3S2D, S5E, S5F raw data
	Well	Fluor	Target	Content	Sample	Cq	SQ
	A01	SYBR	Actin	Unkn	Naïve Ctrl 1	21.9677			12h 0.5mM PA
	A02	SYBR	Actin	Unkn	Naïve Ctrl 2	20.7616
	A03	SYBR	Actin	Unkn	Naïve Ctrl 3	20.0965
	A04	SYBR	Actin	Unkn	LPS-24h 1	21.0364
	A05	SYBR	Actin	Unkn	LPS-24h 2	19.6275
	A06	SYBR	Actin	Unkn	LPS-24h 3	19.1552
	A07	SYBR	Actin	Unkn	PA-12h 1	23.6933
	A08	SYBR	Actin	Unkn	PA-12h 2	23.4209
	A09	SYBR	Actin	Unkn	PA-12h 3	21.496
	B01	SYBR	IL6	Unkn	Naïve Ctrl 1
	B02	SYBR	IL6	Unkn	Naïve Ctrl 2	34.6791
	B03	SYBR	IL6	Unkn	Naïve Ctrl 3	37.5473			Normalizer	12
	B04	SYBR	IL6	Unkn	LPS-24h 1	26.4615
	B05	SYBR	IL6	Unkn	LPS-24h 2	25.6539
	B06	SYBR	IL6	Unkn	LPS-24h 3	25.9067
	B07	SYBR	IL6	Unkn	PA-12h 1	33.7558
	B08	SYBR	IL6	Unkn	PA-12h 2	35.1149
	B09	SYBR	IL6	Unkn	PA-12h 3	34.5324
	C01	SYBR	IL-1b	Unkn	Naïve Ctrl 1	30.0154
	C02	SYBR	IL-1b	Unkn	Naïve Ctrl 2	28.869
	C03	SYBR	IL-1b	Unkn	Naïve Ctrl 3	29.5095
	C04	SYBR	IL-1b	Unkn	LPS-24h 1	19.4866
	C05	SYBR	IL-1b	Unkn	LPS-24h 2	18.6945
	C06	SYBR	IL-1b	Unkn	LPS-24h 3	18.6959
	C07	SYBR	IL-1b	Unkn	PA-12h 1	33.3031
	C08	SYBR	IL-1b	Unkn	PA-12h 2	35.0724
	C09	SYBR	IL-1b	Unkn	PA-12h 3	32.2244
	D01	SYBR	TNFalpha	Unkn	Naïve Ctrl 1	27.604
	D02	SYBR	TNFalpha	Unkn	Naïve Ctrl 2	27.2345
	D03	SYBR	TNFalpha	Unkn	Naïve Ctrl 3	27.55
	D04	SYBR	TNFalpha	Unkn	LPS-24h 1	25.0685						Sample	B-actin	IL6	△Ct	△△Ct	RQ		Sample	B-actin	IL-1b	△Ct	△△Ct	RQ			Sample	B-actin	TNF	△Ct	△△Ct	RQ
	D05	SYBR	TNFalpha	Unkn	LPS-24h 2	24.5911						Naïve Ctrl 1	21.9677		-21.9677	-33.9677			Naïve Ctrl 1	21.9677	30.0154	8.04771	-3.95229	15.4796			Naïve Ctrl 1	21.9677	27.604	5.63633	-6.36367	82.3487
	D06	SYBR	TNFalpha	Unkn	LPS-24h 3	24.6458						Naïve Ctrl 2	20.7616	34.6791	13.9176	1.91757	0.264699		Naïve Ctrl 2	20.7616	28.869	8.10738	-3.89262	14.8523			Naïve Ctrl 2	20.7616	27.2345	6.47297	-5.52703	46.1107
	D07	SYBR	TNFalpha	Unkn	PA-12h 1	28.8579						Naïve Ctrl 3	20.0965	37.5473	17.4508	5.4508	0.0228637		Naïve Ctrl 3	20.0965	29.5095	9.41294	-2.58706	6.00875			Naïve Ctrl 3	20.0965	27.55	7.45343	-4.54657	23.3697
	D08	SYBR	TNFalpha	Unkn	PA-12h 2	28.5114						LPS-24h 1	21.0364	26.4615	5.4251	-6.5749	95.3329		LPS-24h 1	21.0364	19.4866	-1.54987	-13.5499	11992.7			LPS-24h 1	21.0364	25.0685	4.03203	-7.96797	250.379
	D09	SYBR	TNFalpha	Unkn	PA-12h 3	27.5602						LPS-24h 2	19.6275	25.6539	6.02634	-5.97366	62.8419		LPS-24h 2	19.6275	18.6945	-0.933017	-12.933	7820.35			LPS-24h 2	19.6275	24.5911	4.96358	-7.03642	131.273
	E07	SYBR	Actin	Unkn	PA-12h → LPS-24h 1	24.2506						LPS-24h 3	19.1552	25.9067	6.75157	-5.24843	38.0132		LPS-24h 3	19.1552	18.6959	-0.459201	-12.4592	5631.1			LPS-24h 3	19.1552	24.6458	5.49065	-6.50935	91.0983
	E08	SYBR	Actin	Unkn	PA-12h → LPS-24h 2	24.1451						PA-12h 1	23.6933	33.7558	10.0625	-1.93747	3.83034		PA-12h 1	23.6933	33.3031	9.6098	-2.3902	5.2423			PA-12h 1	23.6933	28.8579	5.16458	-6.83542	114.2
	E09	SYBR	Actin	Unkn	PA-12h → LPS-24h 3	22.1969						PA-12h 2	23.4209	35.1149	11.694	-0.306031	1.2363		PA-12h 2	23.4209	35.0724	11.6515	-0.348508	1.27324			PA-12h 2	23.4209	28.5114	5.0905	-6.9095	120.217
	E10	SYBR	Actin	Unkn	EtOH 1	20.9693						PA-12h 3	21.496	34.5324	13.0364	1.03645	0.487526		PA-12h 3	21.496	32.2244	10.7284	-1.27162	2.41432			PA-12h 3	21.496	27.5602	6.06418	-5.93582	61.2153
	E11	SYBR	Actin	Unkn	EtOH 2	18.9006						PA-12h → LPS-24h 1	24.2506	24.9342	0.683611	-11.3164	2550.19		PA-12h → LPS-24h 1	24.2506	22.0727	-2.17785	-14.1779	18533.6			PA-12h → LPS-24h 1	24.2506	25.7158	1.46522	-10.5348	1483.49
	E12	SYBR	Actin	Unkn	EtOH 3	20.7092						PA-12h → LPS-24h 2	24.1451	24.2464	0.101275	-11.8987	3818.33		PA-12h → LPS-24h 2	24.1451	21.6674	-2.47772	-14.4777	22815.4			PA-12h → LPS-24h 2	24.1451	25.3865	1.24136	-10.7586	1732.5
	F07	SYBR	IL6	Unkn	PA-12h → LPS-24h 1	24.9342						PA-12h → LPS-24h 3	22.1969	23.3561	1.15921	-10.8408	1834.02		PA-12h → LPS-24h 3	22.1969	21.0088	-1.18802	-13.188	9332.32			PA-12h → LPS-24h 3	22.1969	24.5134	2.3165	-9.6835	822.29
	F08	SYBR	IL6	Unkn	PA-12h → LPS-24h 2	24.2464						EtOH 1	20.9693	37.9635	16.9942	4.99423	0.0313752		EtOH 1	20.9693	28.6933	7.72408	-4.27592	19.3723			EtOH 1	20.9693	26.9462	5.97698	-6.02302	65.0294
	F09	SYBR	IL6	Unkn	PA-12h → LPS-24h 3	23.3561						EtOH 2	18.9006	35.8545	16.9539	4.95387	0.0322653		EtOH 2	18.9006	28.0142	9.1136	-2.8864	7.39425			EtOH 2	18.9006	26.0347	7.13409	-4.86591	29.1597
	F10	SYBR	IL6	Unkn	EtOH 1	37.9635						EtOH 3	20.7092	34.0518	13.3426	1.34257	0.394318		EtOH 3	20.7092	28.2518	7.54257	-4.45743	21.9695			EtOH 3	20.7092	26.8625	6.15333	-5.84667	57.5471
	F11	SYBR	IL6	Unkn	EtOH 2	35.8545
	F12	SYBR	IL6	Unkn	EtOH 3	34.0518
	G07	SYBR	IL-1b	Unkn	PA-12h → LPS-24h 1	22.0727
	G08	SYBR	IL-1b	Unkn	PA-12h → LPS-24h 2	21.6674
	G09	SYBR	IL-1b	Unkn	PA-12h → LPS-24h 3	21.0088
	G10	SYBR	IL-1b	Unkn	EtOH 1	28.6933
	G11	SYBR	IL-1b	Unkn	EtOH 2	28.0142
	G12	SYBR	IL-1b	Unkn	EtOH 3	28.2518
	H07	SYBR	TNFalpha	Unkn	PA-12h → LPS-24h 1	25.7158
	H08	SYBR	TNFalpha	Unkn	PA-12h → LPS-24h 2	25.3865
	H09	SYBR	TNFalpha	Unkn	PA-12h → LPS-24h 3	24.5134
	H10	SYBR	TNFalpha	Unkn	EtOH 1	26.9462
	H11	SYBR	TNFalpha	Unkn	EtOH 2	26.0347
	H12	SYBR	TNFalpha	Unkn	EtOH 3	26.8625

## Sheet: Fig 3S2G, S5H, S5I raw data
	Well	Fluor	Target	Content	Sample	Cq	SQ
	A01	SYBR	Actin	Unkn	Naïve Ctrl 1	21.7896
	A02	SYBR	Actin	Unkn	Naïve Ctrl 2	22.4673
	A03	SYBR	Actin	Unkn	Naïve Ctrl 3	21.6484
	A04	SYBR	Actin	Unkn	LPS-24h 1	21.7201
	A05	SYBR	Actin	Unkn	LPS-24h 2	21.0127
	A06	SYBR	Actin	Unkn	LPS-24h 3	21.4509
	A07	SYBR	Actin	Unkn	PA-12h 1	21.8275
	A08	SYBR	Actin	Unkn	PA-12h 2	21.4459
	A09	SYBR	Actin	Unkn	PA-12h 3	21.1302
	B01	SYBR	IL6	Unkn	Naïve Ctrl 1	34.8634
	B02	SYBR	IL6	Unkn	Naïve Ctrl 2
	B03	SYBR	IL6	Unkn	Naïve Ctrl 3	33.7803			Normalizer	12
	B04	SYBR	IL6	Unkn	LPS-24h 1	28.1653
	B05	SYBR	IL6	Unkn	LPS-24h 2	27.3499
	B06	SYBR	IL6	Unkn	LPS-24h 3	28.7826
	B07	SYBR	IL6	Unkn	PA-12h 1	34.0006
	B08	SYBR	IL6	Unkn	PA-12h 2	33.9439
	B09	SYBR	IL6	Unkn	PA-12h 3	33.907
	C01	SYBR	IL-1b	Unkn	Naïve Ctrl 1	29.5167
	C02	SYBR	IL-1b	Unkn	Naïve Ctrl 2	33.2012
	C03	SYBR	IL-1b	Unkn	Naïve Ctrl 3	28.4258
	C04	SYBR	IL-1b	Unkn	LPS-24h 1	21.7752
	C05	SYBR	IL-1b	Unkn	LPS-24h 2	21.666
	C06	SYBR	IL-1b	Unkn	LPS-24h 3	22.385
	C07	SYBR	IL-1b	Unkn	PA-12h 1	32.5419
	C08	SYBR	IL-1b	Unkn	PA-12h 2	31.9348
	C09	SYBR	IL-1b	Unkn	PA-12h 3	32.4117
	E07	SYBR	Actin	Unkn	PA-12h → LPS-24h 1	26.2851
	E08	SYBR	Actin	Unkn	PA-12h → LPS-24h 2	25.248
	E09	SYBR	Actin	Unkn	PA-12h → LPS-24h 3	27.637
	E10	SYBR	Actin	Unkn	EtOH 1	19.3889						Sample	B-actin	IL6	△Ct	△△Ct	RQ		Sample	B-actin	IL-1b	△Ct	△△Ct	RQ
	E11	SYBR	Actin	Unkn	EtOH 2	18.4147						Naïve Ctrl 1	21.7896	34.8634	13.0738	1.07384	0.475054		Naïve Ctrl 1	21.7896	29.5167	7.72716	-4.27284	19.331
	E12	SYBR	Actin	Unkn	EtOH 3	19.2101						Naïve Ctrl 2	22.4673		-22.4673	-34.4673			Naïve Ctrl 2	22.4673	33.2012	10.7338	-1.26616	2.4052
	F07	SYBR	IL6	Unkn	PA-12h → LPS-24h 1	29.7326						Naïve Ctrl 3	21.6484	33.7803	12.1318	0.131838	0.912668		Naïve Ctrl 3	21.6484	28.4258	6.77736	-5.22264	37.3397
	F08	SYBR	IL6	Unkn	PA-12h → LPS-24h 2	29.0883						LPS-24h 1	21.7201	28.1653	6.44523	-5.55477	47.0058		LPS-24h 1	21.7201	21.7752	0.0550747	-11.9449	3942.58
	F09	SYBR	IL6	Unkn	PA-12h → LPS-24h 3	30.1234						LPS-24h 2	21.0127	27.3499	6.33722	-5.66278	50.6603		LPS-24h 2	21.0127	21.666	0.653268	-11.3467	2604.39
	F10	SYBR	IL6	Unkn	EtOH 1	30.3003						LPS-24h 3	21.4509	28.7826	7.33171	-4.66829	25.4269		LPS-24h 3	21.4509	22.385	0.934083	-11.0659	2143.74
	F11	SYBR	IL6	Unkn	EtOH 2	27.339						PA-12h 1	21.8275	34.0006	12.1731	0.173094	0.886938		PA-12h 1	21.8275	32.5419	10.7144	-1.28559	2.43781
	F12	SYBR	IL6	Unkn	EtOH 3	34.3119						PA-12h 2	21.4459	33.9439	12.4979	0.497909	0.708132		PA-12h 2	21.4459	31.9348	10.4889	-1.51113	2.85034
	G07	SYBR	IL-1b	Unkn	PA-12h → LPS-24h 1	26.3183						PA-12h 3	21.1302	33.907	12.7769	0.776878	0.583628		PA-12h 3	21.1302	32.4117	11.2816	-0.718425	1.64538
	G08	SYBR	IL-1b	Unkn	PA-12h → LPS-24h 2	26.1452						PA-12h → LPS-24h 1	26.2851	29.7326	3.44752	-8.55248	375.451		PA-12h → LPS-24h 1	26.2851	26.3183	0.0331828	-11.9668	4002.86
	G09	SYBR	IL-1b	Unkn	PA-12h → LPS-24h 3	27.5003						PA-12h → LPS-24h 2	25.248	29.0883	3.84037	-8.15963	285.953		PA-12h → LPS-24h 2	25.248	26.1452	0.897203	-11.1028	2199.25
	G10	SYBR	IL-1b	Unkn	EtOH 1	24.8823						PA-12h → LPS-24h 3	27.637	30.1234	2.48641	-9.51359	730.93		PA-12h → LPS-24h 3	27.637	27.5003	-0.136718	-12.1367	4503.15
	G11	SYBR	IL-1b	Unkn	EtOH 2	21.2971						EtOH 1	19.3889	30.3003	10.9114	-1.08858	2.12665		EtOH 1	19.3889	24.8823	5.49342	-6.50658	90.9233
	G12	SYBR	IL-1b	Unkn	EtOH 3	28.3548						EtOH 2	18.4147	27.339	8.92438	-3.07562	8.4305		EtOH 2	18.4147	21.2971	2.8824	-9.1176	555.482
												EtOH 3	19.2101	34.3119	15.1018	3.10178	0.116486		EtOH 3	19.2101	28.3548	9.14472	-2.85528	7.23646
