# Supplementary material for: Enriched dietary saturated fatty acids induce trained immunity via ceramide production that enhances severity of endotoxemia and clearance of infection
Source: eLife. 2022 Oct 20;11:e76744. doi: 10.7554/eLife.76744 (PMC9642993; doi:10.7554/eLife.76744)
Supplement: Figure 3—figure supplement 3—source data 1. [file elife-76744-fig3-figsupp3-data1.xlsx]

## Sheet: Fig 3S3 AB + STATS
B6 12h PA + 24h LPS 6.22.21-JWH
Ctrl (PBS)	500uM PA	1mM PA	LPS	500uM PA + LPS	1mM PA + LPS
5.13705	14.7978	17.903	6.86218	17.558	21.9858
6.68967	16.6379	16.6954	7.60974	18.363	21.4108
7.03469	13.1877	16.4654	6.22963	15.4303	20.9507
Avg Ctrl (PBS)
6.28714
B6 12h PA + 24h LPS 6.22.21-JWH
Ctrl (PBS)	500uM PA	1mM PA	LPS	500uM PA + LPS	1mM PA + LPS
0.817073	2.35366	2.84756	1.09146	2.79268	3.49695
1.06402	2.64634	2.65549	1.21037	2.92073	3.40549
1.1189	2.09756	2.6189	0.990854	2.45427	3.33232
B6 24h PA + 24h LPS 7.7.21-ALS
Ctrl (PBS)	500uM PA	1mM PA	LPS	500uM PA + LPS	1mM PA + LPS
2.34098	13.5223	14.9546	4.18913	16.2021	10.9811
2.75682	19.5287	13.1526	3.54228	19.7135	11.3045
3.21885	16.0635	12.6906	3.63468	17.4958	14.6311
Avg Ctrl (PBS)
2.77222
B6 24h PA + 24h LPS 7.7.21-ALS
Ctrl (PBS)	500uM PA	1mM PA	LPS	500uM PA + LPS	1mM PA + LPS
0.844444	4.87778	5.39444	1.51111	5.84444	3.96111
0.994444	7.04444	4.74444	1.27778	7.11111	4.07778
1.16111	5.79444	4.57778	1.31111	6.31111	5.27778
Table Analyzed	Fig S6A
Column C	1mM PA
vs.	vs.
Column A	Ctrl (PBS)
Unpaired t test
P value	0.0001
P value summary	***
Significantly different (P < 0.05)?	Yes
One- or two-tailed P value?	Two-tailed
t, df	t=14.62, df=4
Table Analyzed	Fig S6A
Column D	LPS
vs.	vs.
Column A	Ctrl (PBS)
Unpaired t test
P value	0.4345
P value summary	ns
Significantly different (P < 0.05)?	No
One- or two-tailed P value?	Two-tailed
t, df	t=0.8677, df=4
Table Analyzed	Fig S6A
Column E	500uM PA + LPS
vs.	vs.
Column D	LPS
Unpaired t test
P value	0.0004
P value summary	***
Significantly different (P < 0.05)?	Yes
One- or two-tailed P value?	Two-tailed
t, df	t=10.63, df=4
Table Analyzed	Fig S6A
Column F	1mM PA + LPS
vs.	vs.
Column D	LPS
Unpaired t test
P value	<0.0001
P value summary	****
Significantly different (P < 0.05)?	Yes
One- or two-tailed P value?	Two-tailed
t, df	t=29.17, df=4
Table Analyzed	Fig S6B
Column B	500uM PA
vs.	vs.
Column A	Ctrl (PBS)
Unpaired t test
P value	0.0015
P value summary	**
Significantly different (P < 0.05)?	Yes
One- or two-tailed P value?	Two-tailed
t, df	t=7.731, df=4
Table Analyzed	Fig S6B
Column C	1mM PA
vs.	vs.
Column A	Ctrl (PBS)
Unpaired t test
P value	0.0001
P value summary	***
Significantly different (P < 0.05)?	Yes
One- or two-tailed P value?	Two-tailed
t, df	t=14.72, df=4
Table Analyzed	Fig S6B
Column D	LPS
vs.	vs.
Column A	Ctrl (PBS)
Unpaired t test
P value	0.035
P value summary	*
Significantly different (P < 0.05)?	Yes
One- or two-tailed P value?	Two-tailed
t, df	t=3.136, df=4
Table Analyzed	Fig S6B
Column E	500uM PA + LPS
vs.	vs.
Column D	LPS
Unpaired t test
P value	0.0002
P value summary	***
Significantly different (P < 0.05)?	Yes
One- or two-tailed P value?	Two-tailed
t, df	t=13.41, df=4
Table Analyzed	Fig S6B
Column F	1mM PA + LPS
vs.	vs.
Column D	LPS
Unpaired t test
P value	0.002
P value summary	**
Significantly different (P < 0.05)?	Yes
One- or two-tailed P value?	Two-tailed
t, df	t=7.194, df=4
