# Supplementary material for: Enriched dietary saturated fatty acids induce trained immunity via ceramide production that enhances severity of endotoxemia and clearance of infection
Source: eLife. 2022 Oct 20;11:e76744. doi: 10.7554/eLife.76744 (PMC9642993; doi:10.7554/eLife.76744)
Supplement: Figure 3—source data 1. [file elife-76744-fig3-data1.xlsx]

## Sheet: Figure 3A, B, C
FAs
	Lauric 12:0	Myristic 14:0	Myristovaccenic 14:1	Palmitic 16:0	Palmitovaccenic 16:1	Stearic 18:0	12-Octadecanoic 18:1	Linoleic 18:2	y-Linolenic 18:3	Arachidic 20:0	Paullinic 20:1	8,11-Eicosadienoic 20:2	7,10,13-Eicosatrienoic 20:3	Eicosatetraenoic 20:4	Eicosapentaenoic 20:5	Behenic 22:0	Clupanodonic 22:5	Docosahexaenoic 22:6	Lignoceric 24:0	Nervonic 24:1	Capryllic 8:0	Diet	Time
KD1	182360	746224	145220	3099236	372468	2416460	2840853	960786	102720	66916	185339	17101	70363	456681	24230	27415	54583	427226	52111	13316	2240	KD	14
KD2	127454	507571	94365	2155229	335954	1513017	1857084	760147	72141	44066	86255	11176	37508	365475	16533	12458	31721	279382	44555	7784	2309	KD	14
KD3	122587	501360	89998	2454338	276616	1724307	2126031	796580	69431	49305	143084	12847	58953	510089	19662	19320	42736	349691	48214	10567	2673	KD	14
SC1	25114	101214	20752	1311915	320808	962496	1712446	844825	70089	40498	115398	23544	40189	260768	22939	15434	36965	363143	47395	7862	2009	SC	14
SC2	16347	73787	13390	1604349	254433	1324978	1917186	821149	61515	42888	105810	14416	41366	330945	17361	10142	31570	332469	43439	5572	2278	SC	14
SC3	22821	140793	26399	1649667	529193	1146434	2106088	671768	63958	34799	83033	14153	32965	361834	14385	14010	27911	257681	40261	5640	1729	SC	14
TAGs
	TG(12:0_16:0_18:2)	TG(14:0_16:0_18:2)	TG(14:0_16:0_18:1)	TG(15:0_16:0_18:2)	TG(14:0_18:1_18:2) & TG(16:0_16:1_18:2)	TG(16:0_16:1_18:1) & TG(16:0_16:0_18:2)	TG(16:0_16:0_18:1)	TG(16:0_17:0_18:2) & TG(16:0_17:1_18:1)	TG(16:0_18:2_18:3)	TG(16:0_18:2_18:2)	TG(16:0_18:1_18:2)	TG(16:0_18:1_18:1)	TG(18:2_18:2_18:2)	TG(18:1_18:2_18:2)	TG(18:0_18:1_18:2)	TG(18:0_18:1_18:1)	TG(18:0_18:3_20:2)	TG(12:0_12:0_16:0)	TG(10:0_12:0_18:1)	TG(12:0_16:0_16:0)	TG(12:0_16:0_18:1) & TG(14:0_14:0_18:1)	TG(14:0_16:0_18:0)	TG(14:0_18:2_18:2)	TG(16:0_18:0_18:0)	TG(16:0_18:0_18:1)	TG(16:0_18:3_18:3)	TG(18:0_18:0_18:1)	TG(18:1_18:1_18:2)	TG(16:0_18:1_22:1) & TG(18:0_18:1_20:1)	TG(18:1_18:1_20:1)	TG(18:1_18:2_20:1)	TG(16:0_18:1_22:5) & TG(18:1_18:1_20:4)	TG(16:0_18:2_22:5) & TG(18:1_18:2_20:4)	TG(18:2_18:2_20:4)	TG(18:2_18:3_20:4)	TG(18:1_18:1_22:6) & TG(18:1_20:3_20:4)	TG(18:1_18:2_22:6) & TG(18:1_20:4_20:4)	TG(18:2_20:4_20:4)	TG(16:0_18:0_22:1) & TG(16:0_16:0_24:1)	TG(18:1_20:1_22:1) & TG(18:1_18:1_24:1)	TG(18:1_18:3_22:1)	TG(18:1_18:2_22:1)	TG(18:1_18:1_22:1)	TG(16:0_18:1_24:1) & TG(18:0_18:1_22:1)	TG(18:0_18:1_22:0) & TG(16:0_18:1_24:0)	TG(18:0_18:1_24:1)	TG(18:1_22:0_22:1) & TG(16:0_22:1_24:1)	TG(14:0_18:2_18:3)	TG(16:0_16:0_17:0) & TG(15:0_16:0_18:0)
KD1	1540726	4387723	17021187	405867	2610460	11040184	22433586	1277070	157333	2084520	8171267	16652901	330460	968262	4684415	4901718	259491	1460880	465829	7486638	7682552	12635812	285047	2471293	11991251	120070	2304664	2620939	582830	586739	398590	447519	1796373	473599	50213	772531	281487	73911	229916	17065	79761	57461	92217	85519	73381	25610	17830	28171	1826665
KD2	631158	2022442	9200424	571727	1250134	5592847	14225865	511796	63051	1014476	3867657	9573634	157392	460529	2403374	2330601	138229	714945	220388	4091840	3701045	9066037	119187	1275051	6782249	65694	942781	1152165	183595	229414	171654	237893	1106067	226783	25586	418817	129749	32348	69967	4777	32393	17710	22113	22463	20205	8443	4583	15233	985357
KD3	622548	1973997	9106524	560191	1276287	6511717	12935736	608909	92429	1212234	5288834	10935241	192888	545804	2896414	2872846	170014	613611	191753	3558351	3473576	7243000	137132	1109161	6677321	70632	1053398	1517619	280839	336621	252092	293296	1427679	281208	29532	489301	147037	30763	111834	8622	41331	23291	37008	33790	36507	17149	7607	14773	848095
SC1	49176	210169	469791	835863	578110	1893774	1003765	88158	157543	1783301	5318124	4663309	225179	1175468	2414515	255689	67919	16332	7502	78286	111927	234778	84872	28520	174129	12104	45239	2318859	41395	96653	268884	353494	1424199	610630	74716	864829	384509	86227	18036	5525	21347	15736	19491	17815	9203	7335	4761	13616	30350
SC2	76561	351666	796198	700806	765951	2934368	1729350	120675	180028	2008578	6601604	7035531	263472	1275271	3317229	366815	125149	18925	7527	104249	176789	406757	109834	42040	313941	16714	53899	2680358	38253	125759	313286	531767	1335298	450851	52497	709206	273815	65671	15408	3223	26309	15865	14872	10567	6467	3994	2594	15301	34792
SC3	104719	420626	981369	621831	757541	3181564	2004058	155820	134548	1567815	6167105	10609921	228124	1063950	4293352	525524	124926	28530	11765	181757	252204	483234	108377	40996	452229	15241	65700	2661355	41267	176967	357631	471735	1393618	324775	39625	768761	219953	43839	13020	2941	34078	17182	11762	9880	5430	4773	2916	15325	44767
PCs
	PC(16:0_16:0)	PC(16:0_16:1)	PC(16:0_18:1)	PC(16:0_18:2)	PC(16:1_18:2)	PC(14:0_20:4)	PC(18:0_18:1)	PC(18:1_18:1)	PC(18:1_18:2)	PC(18:2_18:2)	PC(18:2_18:3)A	PC(18:3_18:3)	PC 37:4	PC 37:5	PC 37:6	PC(18:0_20:3)	PC(18:1_20:3)	PC(18:1_20:4)	PC(18:2_20:4)	PC(16:1_22:6)	PC(18:0_22:5)A	PC(18:0_22:6)	PC(18:2_22:5)	PC(20:4_20:4)	PC 42:8	PC(14:0_16:0)	PC 30:1	PC 38:1	PC(20:0_18:2)	PC(14:0_14:0)	PC 31:1	PC 31:0	PC(14:0_18:2)	PC(16:0_18:3)a	PC(16:0_18:3)b	PC(16:0_20:3)	PC(16:0_20:4)	PC(18:2_18:3)B	PC(16:0_22:4)	PC(18:0_20:4)	PC(16:0_22:5)	PC(16:0_22:5)B	PC(16:0_22:6)	PC(18:1_20:5)	PC(18:0_22:5)B	PC 42:10	PC(p-32:1) / PC(o-32:2)	PC(p-34:0) / PC(o-34:1)	PC(p-34:1) / PC(o-34:2)
KD1	1852545	1409655	33164462	56780736	324147	46605	8191626	53387579	11788068	43866401	37950	18887	312570	131395	43844	3711617	24810717	1696603	22966074	40276	216188	5519596	2232764	59941	19572	683885	18227	50292	268305	15851	11758	206978	133096	488262	461307	16221240	55259752	592069	1204525	32793915	2401435	1391864	29972799	1111145	286016	64467	23727	155430	140485
KD2	1751583	1039413	24930941	52007798	265410	34355	5638252	42046625	9209414	39633269	36038	14099	333807	91505	30894	2697044	26518721	2001445	17669025	24187	177690	4775492	1899599	50672	9806	515964	12574	34636	181879	12584	10207	183638	87482	369662	341066	12552631	51564695	475129	833632	34582797	2312736	2871222	23614812	1008243	229755	61334	17366	114887	93439
KD3	2759832	1343642	28869520	50219498	287508	37277	7107126	44374215	9895057	39599727	40283	12288	307258	126957	30899	3260624	24981666	1680110	17359218	38719	181186	4930258	1922109	43556	14924	790621	15509	42851	224189	11962	12805	265602	86404	420489	382629	14220093	53382647	516194	1256248	33888455	1773825	1164902	24006724	992988	236359	62663	20328	127284	97454
SC1	805270	610745	9955356	28050038	222091	10995	644099	7970999	2508708	17275998	63123	7459	93865	42862	11842	495929	6224200	2463005	10278098	48606	106644	1301532	2531977	48079	22153	83442	1779	13604	94076	910	1420	30843	40804	131636	320066	3500456	22870277	202492	535217	8603159	3495709	329988	14108481	275204	46442	26305	9363	68717	33581
SC2	1156639	689343	12539311	26907680	193247	10869	802064	7715740	2430748	20243408	81244	6359	93956	53130	10194	461508	6616844	2883102	9896135	41155	119317	1278672	2535773	52508	19721	93176	2952	16440	108633	427	2239	35173	37684	138168	272853	3015044	26392692	164447	430851	9307087	4047464	423684	13577010	330036	76716	31895	8519	83877	39053
SC3	1626478	1103948	19520661	35606814	245149	17974	1301272	12588516	3248291	29398846	119118	7751	134587	46750	11682	749236	11634180	4601570	12955574	50954	188616	2016922	3654558	48934	28276	183404	3937	18745	153373	1221	2398	57661	49365	133680	344445	4642945	37530184	242360	734206	15927820	6429812	634326	17421536	447459	111281	40318	10207	94299	49128
[truncated: 39 more columns]

## Sheet: Fig3D STATS
Table Analyzed	FFA (1:16)		SC	KD	Lipidomics
			1311915	3099236
Column B	KD		1604349	2155229
vs.	vs.		1649667	2454338
Column A	SC
Unpaired t test
P value	0.0245
P value summary	*
Significantly different (P < 0.05)?	Yes
One- or two-tailed P value?	Two-tailed
t, df	t=3.516, df=4
			SC	KD
Table Analyzed	FFA 12:0		25114	182360
			16347	127454
Column D	KD		22821	122587
vs.	vs.
Column A	SC
Unpaired t test
P value	0.0032
P value summary	**
Significantly different (P < 0.05)?	Yes
One- or two-tailed P value?	Two-tailed
t, df	t=6.343, df=4
			SC	KD
Table Analyzed	FFA 14:0		101214	746224
			73787	507571
Column D	KD		140793	501360
vs.	vs.
Column A	SC
Unpaired t test
P value	0.0044
P value summary	**
Significantly different (P < 0.05)?	Yes
One- or two-tailed P value?	Two-tailed
t, df	t=5.786, df=4
			SC	KD
Table Analyzed	FFA 14:1		20752	145220
			13390	94365
Column D	Keto		26399	89998
vs.	vs.
Column A	LFLS
Unpaired t test
P value	0.0078
P value summary	**
Significantly different (P < 0.05)?	Yes
One- or two-tailed P value?	Two-tailed
t, df	t=4.949, df=4

## Sheet: Figure 3E, F, G + STATS
Well	Fluor	Target	Content	Sample	Cq
A01	SYBR	B-actin	Unkn	Ctrl1	19.8746	BMDM 12h 1mM PA, 24h LPS 3.12.20			Normalizer
A02	SYBR	B-actin	Unkn	Ctrl2	19.773			Sample Name	Actin	TNFalpha	△Ct	△△Ct	RQ
A03	SYBR	B-actin	Unkn	Ctrl3	20.6847			Ctrl1	19.8746	26.5493	6.67472	-5.32528	40.0929
A04	SYBR	B-actin	Unkn	LPS1	19.4513			Ctrl2	19.773	26.4028	6.62978	-5.37022	41.3615
A05	SYBR	B-actin	Unkn	LPS2	21.7933			Ctrl3	20.6847	27.1944	6.50976	-5.49024	44.9496
A06	SYBR	B-actin	Unkn	LPS3	19.4718			LPS1	19.4513	22.7231	3.27183	-8.72817	424.073
A07	SYBR	B-actin	Unkn	PA1	27.0113			LPS2	21.7933	24.0077	2.21439	-9.78561	882.599
A08	SYBR	B-actin	Unkn	PA2	25.7598			LPS3	19.4718	22.8475	3.37574	-8.62426	394.603
A09	SYBR	B-actin	Unkn	PA3	24.5502			PA1	27.0113	30.6629	3.65162	-8.34838	325.921
B07	SYBR	B-actin	Unkn	PA+LPS1	29.76			PA2	25.7598	29.2663	3.50647	-8.49353	360.42
B08	SYBR	B-actin	Unkn	PA+LPS2	29.7716			PA3	24.5502	28.8928	4.34261	-7.65739	201.885
B09	SYBR	B-actin	Unkn	PA+LPS3	30.0796			PA+LPS1	29.76	30.3901	0.630157	-11.3698	2646.45
B10	SYBR	B-actin	Unkn	E1	21.1075			PA+LPS2	29.7716	30.3772	0.605657	-11.3943	2691.78
B11	SYBR	B-actin	Unkn	E2	22.2154			PA+LPS3	30.0796	30.7881	0.708464	-11.2915	2506.63
B12	SYBR	B-actin	Unkn	E3	21.3943			E1	21.1075	27.0122	5.90473	-6.09527	68.3688
C01	SYBR	TNF-alpha	Unkn	Ctrl1	26.5493			E2	22.2154	27.3174	5.10193	-6.89807	119.269
C02	SYBR	TNF-alpha	Unkn	Ctrl2	26.4028			E3	21.3943	27.7721	6.37777	-5.62223	49.256
C03	SYBR	TNF-alpha	Unkn	Ctrl3	27.1944
C04	SYBR	TNF-alpha	Unkn	LPS1	22.7231
C05	SYBR	TNF-alpha	Unkn	LPS2	24.0077			Calibrator	12
C06	SYBR	TNF-alpha	Unkn	LPS3	22.8475
C07	SYBR	TNF-alpha	Unkn	PA1	30.6629				Normalizer
C08	SYBR	TNF-alpha	Unkn	PA2	29.2663			Sample Name	Actin	IL-1b	△Ct	△△Ct	RQ
C09	SYBR	TNF-alpha	Unkn	PA3	28.8928			Ctrl1	19.8746	28.1797	8.3051	-3.6949	12.9502
D07	SYBR	TNF-alpha	Unkn	PA+LPS1	30.3901			Ctrl2	19.773	29.0783	9.30523	-2.69477	6.47449
D08	SYBR	TNF-alpha	Unkn	PA+LPS2	30.3772			Ctrl3	20.6847	30.1413	9.45664	-2.54336	5.82946
D09	SYBR	TNF-alpha	Unkn	PA+LPS3	30.7881			LPS1	19.4513	17.0057	-2.44555	-14.4455	22312.2
D10	SYBR	TNF-alpha	Unkn	E1	27.0122			LPS2	21.7933	18.1849	-3.60838	-15.6084	49956.5
D11	SYBR	TNF-alpha	Unkn	E2	27.3174			LPS3	19.4718	17.0577	-2.41403	-14.414	21830.1
D12	SYBR	TNF-alpha	Unkn	E3	27.7721			PA1	29.1062	36.7982	7.69198	-4.30802	19.8081
E01	SYBR	IL-1b	Unkn	Ctrl1	28.1797			PA2	30.068	37.8238	7.75587	-4.24413	18.95
E02	SYBR	IL-1b	Unkn	Ctrl2	29.0783			PA3	28.5151	37.0455	8.53045	-3.46955	11.0774
E03	SYBR	IL-1b	Unkn	Ctrl3	30.1413			PA+LPS1	29.76	29.4351	-0.324864	-12.3249	5130.43
E04	SYBR	IL-1b	Unkn	LPS1	17.0057			PA+LPS2	29.7716	29.8675	0.0959357	-11.9041	3832.48
E05	SYBR	IL-1b	Unkn	LPS2	18.1849			PA+LPS3	30.0796	29.655	-0.424588	-12.4246	5497.61
E06	SYBR	IL-1b	Unkn	LPS3	17.0577			E1	21.1075	29.3308	8.22331	-3.77669	13.7056
F04	SYBR	IL-1b	Unkn	PA1	36.7982			E2	22.2154	29.1777	6.96221	-5.03779	32.8494
F05	SYBR	IL-1b	Unkn	PA2	37.8238			E3	21.3943	29.4406	8.04626	-3.95374	15.4951
F06	SYBR	IL-1b	Unkn	PA3	37.0455
F07	SYBR	IL-1b	Unkn	PA+LPS1	29.4351				Normalizer
F08	SYBR	IL-1b	Unkn	PA+LPS2	29.8675			Sample Name	Actin	IL-6	△Ct	△△Ct	RQ
F09	SYBR	IL-1b	Unkn	PA+LPS3	29.655			Ctrl1	19.8746	34.3888	14.5142	2.51423	0.175042
F10	SYBR	IL-1b	Unkn	E1	29.3308			Ctrl2	19.773	34.3104	14.5374	2.53739	0.172254
F11	SYBR	IL-1b	Unkn	E2	29.1777			Ctrl3	20.6847	35.1533	14.4687	2.46867	0.180658
F12	SYBR	IL-1b	Unkn	E3	29.4406			LPS1	19.4513	22.7537	3.30243	-8.69757	415.172
G01	SYBR	IL-6	Unkn	Ctrl1	34.3888			LPS2	21.7933	24.1035	2.31019	-9.68981	825.891
G02	SYBR	IL-6	Unkn	Ctrl2	34.3104			LPS3	19.4718	23.0809	3.60913	-8.39087	335.664
G03	SYBR	IL-6	Unkn	Ctrl3	35.1533			PA1	29.1062	33.9155	4.80936	-7.19064	146.083
G04	SYBR	IL-6	Unkn	LPS1	22.7537			PA2	30.068	34.3793	4.31133	-7.68867	206.31
G05	SYBR	IL-6	Unkn	LPS2	24.1035			PA3	28.5151	32.6274	4.11227	-7.88773	236.833
G06	SYBR	IL-6	Unkn	LPS3	23.0809			PA+LPS1	29.76	30.2957	0.535764	-11.4642	2825.39
H04	SYBR	IL-6	Unkn	PA1	33.9155			PA+LPS2	29.7716	30.3699	0.598336	-11.4017	2705.47
H05	SYBR	IL-6	Unkn	PA2	34.3793			PA+LPS3	30.0796	30.7327	0.65308	-11.3469	2604.73
H06	SYBR	IL-6	Unkn	PA3	32.6274			E1	21.1075	34.9173	13.8098	1.80982	0.285227
H07	SYBR	IL-6	Unkn	PA+LPS1	30.2957			E2	22.2154	34.8894	12.6739	0.673946	0.62679
H08	SYBR	IL-6	Unkn	PA+LPS2	30.3699			E3	21.3943	34.8413	13.447	1.44704	0.366774
H09	SYBR	IL-6	Unkn	PA+LPS3	30.7327
H10	SYBR	IL-6	Unkn	E1	34.9173
H11	SYBR	IL-6	Unkn	E2	34.8894
H12	SYBR	IL-6	Unkn	E3	34.8413
Table Analyzed	Fig 3E
Column H	P-12h → L-24h
vs.	vs.
Column C	LPS-24h
Unpaired t test
P value	0.0003
P value summary	***
Significantly different (P < 0.05)?	Yes
One- or two-tailed P value?	Two-tailed
t, df	t=12.22, df=4
Table Analyzed	Fig 3E
Column D	PA-12h
vs.	vs.
Column B	Ctrl
Unpaired t test
P value	0.0062
P value summary	**
Significantly different (P < 0.05)?	Yes
One- or two-tailed P value?	Two-tailed
t, df	t=5.273, df=4
Table Analyzed	Fig 3E
Column C	LPS-24h
vs.	vs.
Column B	Ctrl
Unpaired t test
P value	0.0293
P value summary	*
Significantly different (P < 0.05)?	Yes
One- or two-tailed P value?	Two-tailed
t, df	t=3.323, df=4
Table Analyzed	Fig 3E
Column H	P-12h → L-24h
vs.	vs.
Column D	PA-12h
Unpaired t test
P value	<0.0001
P value summary	****
Significantly different (P < 0.05)?	Yes
One- or two-tailed P value?	Two-tailed
t, df	t=31.49, df=4
Table Analyzed	Fig 3F
Column H	P-12h → L-24h
vs.	vs.
Column C	LPS-24h
Unpaired t test
P value	0.0002
P value summary	***
Significantly different (P < 0.05)?	Yes
One- or two-tailed P value?	Two-tailed
t, df	t=13.27, df=4
Table Analyzed	Fig 3F
Column C	LPS-24h
vs.	vs.
Column B	Ctrl
Unpaired t test
P value	0.0258
P value summary	*
Significantly different (P < 0.05)?	Yes
One- or two-tailed P value?	Two-tailed
t, df	t=3.459, df=4
Table Analyzed	Fig 3F
Column D	PA-12h
vs.	vs.
Column B	Ctrl
Unpaired t test
P value	0.0025
P value summary	**
Significantly different (P < 0.05)?	Yes
One- or two-tailed P value?	Two-tailed
t, df	t=6.776, df=4
Table Analyzed	Fig 3G
Column H	P-12h → L-24h
vs.	vs.
Column C	LPS-24h
Unpaired t test
P value	0.0001
P value summary	***
Significantly different (P < 0.05)?	Yes
One- or two-tailed P value?	Two-tailed
t, df	t=25.51, df=3
Table Analyzed	Fig 3G
Column D	PA-12h
vs.	vs.
Column C	LPS-24h
Unpaired t test
P value	<0.0001
P value summary	****
Significantly different (P < 0.05)?	Yes
One- or two-tailed P value?	Two-tailed
t, df	t=122.8, df=3
Table Analyzed	Fig 3G
Column H	P-12h → L-24h
vs.	vs.
Column D	PA-12h
Unpaired t test
P value	0.0007
P value summary	***
Significantly different (P < 0.05)?	Yes
One- or two-tailed P value?	Two-tailed
t, df	t=9.530, df=4
Table Analyzed	Fig 3G
Column C	LPS-24h
vs.	vs.
Column B	Ctrl
Unpaired t test
P value	0.028
P value summary	*
Significantly different (P < 0.05)?	Yes
One- or two-tailed P value?	Two-tailed
t, df	t=3.373, df=4

## Sheet: Figure 3H, I, J + STATS
Fig 3H	Below threshold?	P value	Mean of 12h Naive	Mean of 12h PA	Difference	SE of difference	t ratio	df
Control (PBS)	No	0.779058	670.603	690.529	-19.9259	66.3999	0.30009	4
LPS	Yes	9.19049e-05	8413.55	32387.2	-23973.7	1509.66	15.8801	4
BMDM Treatment	pg/mL (Interpolated)	Absorbance (450nm) (Entered)	Fig 3H
CTRL 1	641.924	0.024
CTRL 2	660.964	0.025
CTRL 3	708.922	0.0275
LPS 1	9100.29	0.3615
LPS 2	7467.6	0.3035
LPS 3	8672.77	0.3465
PA 1	641.924	0.024
PA 2	816.139	0.033
PA 3	613.525	0.0225
PA LPS 1	30381.6	0.9815
PA LPS 2	35151.7	1.088
PA LPS 3	31628.4	1.0105
EtOH 1	557.322	0.0195
EtOH 2	651.434	0.0245
EtOH 3	240.552	0.0015
Fig 3I	Below threshold?	P value	Mean of 12h Naive	Mean of 12h PA	Difference	SE of difference	t ratio	df
Control (PBS)	No	0.980588	993.483	986.133	7.34983	283.933	0.0258858	4
LPS	Yes	3.48251e-05	29149.8	65141.4	-35991.6	1773.72	20.2915	4
BMDM Treatment	pg/mL (Interpolated)	Absorbance (450nm) (Entered)	Fig 3I
CTRL 1	742.829	-0.0015
CTRL 2	1376.62	0.0115
CTRL 3	861.001	0.001
LPS 1	29666	0.4455
LPS 2	27936.5	0.4215
LPS 3	29846.9	0.448
PA 1	1376.62	0.0115
PA 2	908.826	0.002
PA 3	672.955	-0.003
PA LPS 1	61959.2	0.871
PA LPS 2	67587.7	0.942
PA LPS 3	65877.2	0.9205
EtOH 1	1103	0.006
EtOH 2	1029.67	0.0045
EtOH 3	1005.36	0.004
Fig3J	Below threshold?	P value	Mean of 12h Naive	Mean of 12h PA	Difference	SE of difference	t ratio	df
Control (PBS)	No	0.916033	3.24442	3.29548	-0.0510543	0.454827	0.11225	4
LPS	Yes	0.00194091	20.7463	93.434	-72.6876	10.0527	7.23062	4
BMDM Treatment	pg/mL (Interpolated)	Absorbance (450nm) (Entered)	Fig 3J
CTRL 1	3.61878	0.021
CTRL 2	3.61878	0.021
CTRL 3	2.4957	0.013
LPS 1	24.883	0.22
LPS 2	20.434	0.1745
LPS 3	16.922	0.1395
PA 1	3.61878	0.021
PA 2	3.48278	0.02
PA 3	2.78487	0.015
PA LPS 1	111.852	1.1285
PA LPS 2	89.9551	0.9105
PA LPS 3	78.4947	0.792
EtOH 1	0.51688	0.001
EtOH 2	0.616966	0.0015
EtOH 3	1.57873	0.007

## Sheet: Figure 3K, 5A + STATS
Note for Reviewers: Naïve, LPS, PA + LPS and EtOH triplicates were run alongside FB1 triplicates for Fig 3K-M, and OA triplicates show in in Fig 5A-C.
Software Version	3.10.06
Experiment File Path:
Protocol File Path:
Plate Number	Plate 1	TNF	54 samples
Date	2021-12-05
Time	00:58:38
Reader Type:	Synergy HTX
Reader Serial Number:	2009032
Reading Type	Reader
Procedure Details
Plate Type	96 WELL PLATE (Use plate lid)
Eject plate on completion
Read	Absorbance Endpoint
	Full Plate
	Wavelengths: 450
	Read Speed: Normal, Delay: 100 msec, Measurements/Data Point: 8
Layout
		1	2	3	4	5	6	7	8	9	10	11	12
	A	STD1	STD1	SPL1	SPL9	SPL17	SPL25	SPL33	SPL41	SPL49				Well ID
		2000	2000											Conc/Dil
	B	STD2	STD2	SPL2	SPL10	SPL18	SPL26	SPL34	SPL42	SPL50				Well ID
		1000	1000											Conc/Dil
	C	STD3	STD3	SPL3	SPL11	SPL19	SPL27	SPL35	SPL43	SPL51				Well ID
		500	500											Conc/Dil
	D	STD4	STD4	SPL4	SPL12	SPL20	SPL28	SPL36	SPL44	SPL52				Well ID
		250	250											Conc/Dil
	E	STD5	STD5	SPL5	SPL13	SPL21	SPL29	SPL37	SPL45	SPL53				Well ID
		125	125											Conc/Dil
	F	STD6	STD6	SPL6	SPL14	SPL22	SPL30	SPL38	SPL46	SPL54				Well ID
		62.5	62.5											Conc/Dil
	G	STD7	STD7	SPL7	SPL15	SPL23	SPL31	SPL39	SPL47	SPL55				Well ID
		31.3	31.3											Conc/Dil
	H	BLK	BLK	SPL8	SPL16	SPL24	SPL32	SPL40	SPL48	SPL56				Well ID
														Conc/Dil
Results
Actual Temperature:	21.3
		1	2	3	4	5	6	7	8	9	10	11	12				Blanked 450
	A	1.673	1.754	0.324	0.097	0.522	0.091	0.284	0.091	0.281				450				1	2	3	4	5	6	7	8	9	10
		1.593	1.675	0.244	0.018	0.442	0.012	0.205	0.012	0.201				Blank 450			A	1.593	1.675	0.244	0.018	0.442	0.012	0.205	0.012	0.201
	B	1.419	1.413	0.35	0.088	0.509	0.091	0.078	0.088	0.29				450			B	1.34	1.334	0.271	0.008	0.43	0.011	-0.001	0.009	0.21
		1.34	1.334	0.271	0.008	0.43	0.011	-0.001	0.009	0.21				Blank 450			C	0.831	0.81	0.233	0.009	0.294	0.028	0.019	0.358	0.193
	C	0.91	0.889	0.312	0.088	0.374	0.108	0.098	0.437	0.272				450			D	0.444	0.528	0.236	0.006	0.163	0.005	0.014	0.259	0.012
		0.831	0.81	0.233	0.009	0.294	0.028	0.019	0.358	0.193				Blank 450			E	0.276	0.267	0.205	0.007	0.284	0.004	0.167	0.239	0.002
	D	0.524	0.607	0.315	0.085	0.242	0.084	0.093	0.339	0.092				450			F	0.156	0.163	0.218	0	0.31	0.004	0.163	0.009	-0.003
		0.444	0.528	0.236	0.006	0.163	0.005	0.014	0.259	0.012				Blank 450			G	0.09	0.091	0.006	0.003	0.26	0.137	0.139	0.041
	E	0.355	0.347	0.284	0.087	0.363	0.083	0.247	0.319	0.082				450			H	-0.002	0.002	0.006	0.36	0.182	0.133	0.006	0.01
		0.276	0.267	0.205	0.007	0.284	0.004	0.167	0.239	0.002				Blank 450
	F	0.235	0.242	0.297	0.079	0.39	0.083	0.242	0.089	0.076				450
		0.156	0.163	0.218	0	0.31	0.004	0.163	0.009	-0.003				Blank 450			Average Absorbance
	G	0.169	0.171	0.085	0.083	0.339	0.217	0.219	0.121	0.089				450			Standards			FB plate		FB plate		FB plate
		0.09	0.091	0.006	0.003	0.26	0.137	0.139	0.041	0.009				Blank 450		TNF	2000	1.634		FB L	0.244	PA	0.006	PA FB	0.007
	H	0.078	0.081	0.085	0.44	0.262	0.213	0.085	0.089	0.072				450			1000	1.337		FB L	0.271	PA	0.006	PA FB	0
		-0.002	0.002	0.006	0.36	0.182	0.133	0.006	0.01	-0.007				Blank 450			500	0.8205		FB L	0.233	PA	0.018	PA FB	0.003
																	250	0.486		L	0.236	FB	0.008	PA L	0.36
																	125	0.2715		L	0.205	FB	0.009	PA L	0.442
Table Analyzed	Fig 3K																62.5	0.1595		L	0.218	FB	0.006	PA L	0.43
																	31.3	0.0905
Column B	LPS-24h																			FB plate		FB/OA plates		OA plate
vs.	vs.																			PA FB L	0.294	N (for FB)	0.012	L	0.137
Column A	Naive																			PA FB L	0.163	N (for FB)	0.011	L	0.133
																				PA FB L	0.284	N (for FB)	0.028	L	0.205
Unpaired t test																				E (0.97%)	0.31	N (for OA)	0.005	OA	-0.001
P value	<0.0001																			E (0.97%)	0.26	N (for OA)	0.004	OA	0.019
P value summary	****																			E (0.97%)	0.182	N (for OA)	0.004	OA	0.014
Significantly different (P < 0.05)?	Yes
One- or two-tailed P value?	Two-tailed																			OA plate
t, df	t=17.45, df=4																			OA L	0.167	PA L	0.358	OA PA L	0.201
																				OA L	0.163	PA L	0.259	OA PA L	0.21
Table Analyzed	FIG 3K																			OA L	0.139	PA L	0.239	OA PA L	0.193
																				PA	0.006	OA PA	0.009	E (0.83%)	0.012
Column H	PA-12h → LPS-24h																			PA	0.012	OA PA	0.041	E (0.83%)	0.002
vs.	vs.																			PA	0.009	OA PA	0.01	E (0.83%)	-0.003
Column B	LPS-24h
																		Note: EtOH% for PA + FB = 0.97%; EtOH% for PA only = 0.83%
Unpaired t test
P value	0.0026
P value summary	**
Significantly different (P < 0.05)?	Yes
One- or two-tailed P value?	Two-tailed
t, df	t=6.676, df=4
Table Analyzed	FIG 3K
Column I	PA/FB1-12h → LPS-24h
vs.	vs.
Column H	PA-12h → LPS-24h
Unpaired t test
P value	0.0251
P value summary	*
Significantly different (P < 0.05)?	Yes
One- or two-tailed P value?	Two-tailed
t, df	t=3.491, df=4
Table Analyzed	FIG 5A
Column B	LPS-24h
vs.	vs.
Column A	Naive
Unpaired t test
P value	0.001
P value summary	***
Significantly different (P < 0.05)?	Yes
One- or two-tailed P value?	Two-tailed
t, df	t=4.614, df=10
Table Analyzed	FIG 5A
Column H	PA-12h → LPS-24h
vs.	vs.
Column B	LPS-24h
Unpaired t test
P value	0.0007
P value summary	***
Significantly different (P < 0.05)?	Yes
One- or two-tailed P value?	Two-tailed
t, df	t=4.832, df=10
Table Analyzed	FIG 5A
Column B	LPS-24h
vs.	vs.
Column A	Naive
Unpaired t test
P value	0.0063
P value summary	**
Significantly different (P < 0.05)?	Yes
One- or two-tailed P value?	Two-tailed
t, df	t=5.252, df=4

## Sheet: Figure 3L + STATS
Note for Reviewers: Naïve, LPS, PA + LPS and EtOH triplicates were run alongside FB1 triplicates for Fig 3K-M, and OA triplicates show in in Fig 5A-C.
Software Version	3.10.06
Experiment File Path:	C:\Users\ajsaini\Desktop\Amy ELISA 12.9.21.xpt
Protocol File Path:	C:\Users\Public\Documents\Protocols\IL6 ELISA Protocol.prt
Plate Number	Plate 1
Date	2021-12-09
Time	19:13:23
Reader Type:	Synergy HTX
Reader Serial Number:	2009032
Reading Type	Reader
Procedure Details
Plate Type	96 WELL PLATE (Use plate lid)
Eject plate on completion
Read	Absorbance Endpoint
	Full Plate
	Wavelengths: 450, 620
	Read Speed: Normal, Delay: 100 msec, Measurements/Data Point: 8
Layout
		1	2	3	4	5	6	7	8	9	10	11	12
	A	STD1	STD1	SPL1	SPL9	SPL17	SPL25							Well ID
		2000	2000											Conc/Dil
	B	STD2	STD2	SPL2	SPL10	SPL18	SPL26							Well ID
		1000	1000											Conc/Dil
	C	STD3	STD3	SPL3	SPL11	SPL19	SPL27							Well ID
		500	500											Conc/Dil
	D	STD4	STD4	SPL4	SPL12	SPL20								Well ID
		250	250											Conc/Dil		Blanked 450
	E	STD5	STD5	SPL5	SPL13	SPL21								Well ID			1	2	3	4	5	6	7	8	9
		125	125											Conc/Dil		A	2.427	3.13	0.564	0.068	1.606	0.075
	F	STD6	STD6	SPL6	SPL14	SPL22								Well ID		B	1.432	1.733	0.576	0.071	1.507	0.067
		62.5	62.5											Conc/Dil		C	0.768	0.868	0.737	0.066	1.431	0.071
	G	STD7	STD7	SPL7	SPL15	SPL23								Well ID		D	0.415	0.439	0.613	0.061	1.418
		31.3	31.3											Conc/Dil		E	0.214	0.217	0.594	0.063	1.328
	H	BLK	BLK	SPL8	SPL16	SPL24								Well ID		F	0.118	0.1	0.564	0.063	0.787
														Conc/Dil		G	0.065	0.047	0.063	0.064	0.738
																H	0.012	-0.012	0.067	1.486	0.877
Results
Actual Temperature:	23.4
Actual Temperature:	23.4
																			FB plate		FB plate		FB plate
		1	2	3	4	5	6	7	8	9	10	11	12				Average Absorbance		FB L	0.564	PA	0.063	PA FB	0.063
	A	2.502	3.206	0.564	0.068	1.606	0.075							450			Standards		FB L	0.576	PA	0.067	PA FB	0.063
		0.053	0.064	0.041	0.037	0.05	0.045							620		IL-6	2000	2.7785	FB L	0.737	PA	0.068	PA FB	0.064
		2.427	3.13	0.489	-0.008	1.53	-0.001							Blank 450			1000	1.5825	L	0.613	FB	0.071	PA L	1.486
		0.015	0.026	0.004	0	0.012	0.008							Blank 620			500	0.818	L	0.594	FB	0.066	PA L	1.606
	B	1.508	1.808	0.576	0.071	1.507	0.067							450			250	0.427	L	0.564	FB	0.061	PA L	1.507
		0.048	0.047	0.042	0.041	0.048	0.038							620			125	0.2155
		1.432	1.733	0.5	-0.005	1.432	-0.009							Blank 450			62.5	0.109	FB plate		FB/OA plates
		0.011	0.01	0.005	0.003	0.011	0							Blank 620			31.3	0.056	PA FB L	1.431	N (for FB)	0.075
	C	0.843	0.943	0.737	0.066	1.431	0.071							450					PA FB L	1.418	N (for FB)	0.067
		0.061	0.043	0.042	0.039	0.048	0.039							620					PA FB L	1.328	N (for FB)	0.071
		0.768	0.868	0.661	-0.01	1.356	-0.005							Blank 450					E (0.97%) +L	0.787
		0.024	0.005	0.004	0.002	0.011	0.002							Blank 620					E (0.97%) +L	0.738
	D	0.49	0.514	0.613	0.061	1.418								450					E (0.97%) +L	0.877
		0.04	0.039	0.04	0.035	0.046								620
		0.415	0.439	0.538	-0.015	1.343								Blank 450
		0.003	0.002	0.002	-0.002	0.008								Blank 620
	E	0.29	0.292	0.594	0.063	1.328								450
		0.038	0.037	0.04	0.036	0.046								620
		0.214	0.217	0.518	-0.013	1.253								Blank 450
		0	0	0.003	-0.001	0.009								Blank 620
	F	0.194	0.175	0.564	0.063	0.787								450
		0.038	0.037	0.04	0.037	0.042								620
		0.118	0.1	0.489	-0.013	0.712								Blank 450
		0.001	0	0.003	-0.001	0.004								Blank 620
	G	0.141	0.122	0.063	0.064	0.738								450
		0.038	0.037	0.037	0.039	0.045								620
		0.065	0.047	-0.012	-0.011	0.662								Blank 450
		0.001	0	0	0.001	0.007								Blank 620
	H	0.088	0.064	0.067	1.486	0.877								450
		0.037	0.037	0.038	0.048	0.042								620
		0.012	-0.012	-0.009	1.41	0.802								Blank 450
		0	0	0.001	0.011	0.005								Blank 620
Table Analyzed	Fig 3L
Column H	PA-12h → LPS-24h
vs.	vs.
Column B	LPS-24h
Unpaired t test
P value	<0.0001
P value summary	****
Significantly different (P < 0.05)?	Yes
One- or two-tailed P value?	Two-tailed
t, df	t=23.36, df=4
Table Analyzed	Fig 3L
Column I	PA/FB1-12h → LPS-24h
vs.	vs.
Column H	PA-12h → LPS-24h
Unpaired t test
P value	0.0459
P value summary	*
Significantly different (P < 0.05)?	Yes
One- or two-tailed P value?	Two-tailed
t, df	t=2.860, df=4
Table Analyzed	Fig 3L
Column C	EtOH (0.97%) + LPS-24h
vs.	vs.
Column B	LPS-24h
Unpaired t test
P value	0.0084
P value summary	**
Significantly different (P < 0.05)?	Yes
One- or two-tailed P value?	Two-tailed
t, df	t=4.844, df=4
Table Analyzed	Fig 3L
Column B	LPS-24h
vs.	vs.
Column A	Naive
Unpaired t test
P value	<0.0001
P value summary	****
Significantly different (P < 0.05)?	Yes
One- or two-tailed P value?	Two-tailed
t, df	t=34.61, df=4
Table Analyzed	Fig 3L
Column I	PA/FB1-12h → LPS-24h
vs.	vs.
Column B	LPS-24h
Unpaired t test
P value	<0.0001
P value summary	****
Significantly different (P < 0.05)?	Yes
One- or two-tailed P value?	Two-tailed
t, df	t=22.37, df=4

## Sheet: Figure 3M(1), 5C + STATS
Note for Reviewers: Naïve, LPS, PA + LPS and EtOH triplicates were run alongside FB1 triplicates for Fig 3K-M, and OA triplicates show in in Fig 5A-C.
Software Version	3.10.06
Experiment File Path:
Protocol File Path:
Plate Number	Plate 1
Date	2021-11-29	IL-1b 11.18.21 BMDM supe 200uMOA / 500uMPA
Time	19:40:05
Reader Type:	Synergy HTX
Reader Serial Number:	2009032
Reading Type	Reader
Procedure Details
Plate Type	96 WELL PLATE (Use plate lid)
Eject plate on completion
Read	Absorbance Endpoint
	Full Plate
	Wavelengths: 450
	Read Speed: Normal, Delay: 100 msec, Measurements/Data Point: 8
Layout
		1	2	3	4	5	6	7	8	9	10	11	12
	A	STD1	STD1	SPL1	SPL9	SPL17	SPL25							Well ID
		500	500											Conc/Dil
	B	STD2	STD2	SPL2	SPL10	SPL18	SPL26							Well ID
		250	250											Conc/Dil
	C	STD3	STD3	SPL3	SPL11	SPL19	SPL27							Well ID
		125	125											Conc/Dil
	D	STD4	STD4	SPL4	SPL12	SPL20								Well ID
		62.5	62.5											Conc/Dil
	E	STD5	STD5	SPL5	SPL13	SPL21								Well ID
		31.25	31.25											Conc/Dil
	F	STD6	STD6	SPL6	SPL14	SPL22								Well ID
		15.6	15.6											Conc/Dil
	G	STD7	STD7	SPL7	SPL15	SPL23								Well ID
		7.8	7.8											Conc/Dil
	H	BLK	BLK	SPL8	SPL16	SPL24								Well ID
														Conc/Dil
Results
Actual Temperature:	22.6
		1	2	3	4	5	6	7	8	9	10	11	12				Blanked 450
	A	2.208	2.28	0.154	0.14	0.466	0.148							450				1	2	3	4	5	6	7	8
		2.093	2.165	0.039	0.026	0.352	0.033							Blank 450			A	2.093	2.165	0.039	0.026	0.352	0.033
	B	1.329	1.481	0.16	0.207	0.412	0.166							450			B	1.214	1.366	0.045	0.092	0.298	0.051
		1.214	1.366	0.045	0.092	0.298	0.051							Blank 450			C	0.693	0.788	0.04	0.096	0.046	0.05
	C	0.807	0.902	0.154	0.211	0.16	0.165							450			D	0.368	0.403	0.092	0.106	0.054
		0.693	0.788	0.04	0.096	0.046	0.05							Blank 450			E	0.18	0.221	0.097	0.056	0.049
	D	0.483	0.517	0.206	0.221	0.169								450			F	0.098	0.127	0.09	0.056	0.107
		0.368	0.403	0.092	0.106	0.054								Blank 450			G	0.049	0.053	0.038	0.037	0.119
	E	0.294	0.336	0.211	0.171	0.164								450			H	-0.004	0.004	0.044	0.346	0.119
		0.18	0.221	0.097	0.056	0.049								Blank 450
	F	0.213	0.241	0.204	0.17	0.221								450
		0.098	0.127	0.09	0.056	0.107								Blank 450			Average Absorbance
	G	0.164	0.167	0.153	0.152	0.234								450			Standards
		0.049	0.053	0.038	0.037	0.119								Blank 450		IL-1b	500	2.129		N	0.039	OA	0.038	PA	0.056
	H	0.111	0.119	0.158	0.461	0.233								450			250	1.29		N	0.045	OA	0.044	PA	0.056
		-0.004	0.004	0.044	0.346	0.119								Blank 450			125	0.7405		N	0.04	OA	0.026	PA	0.037
																	62.5	0.3855		L	0.092	OA L	0.092	PA L	0.346
Table Analyzed	FIG 3M																31.25	0.2005		L	0.097	OA L	0.096	PA L	0.352
																	15.625	0.1125		L	0.09	OA L	0.106	PA L	0.298
Column B	LPS-24h																7.813	0.051
vs.	vs.
Column A	Naive																			OA PA	0.046
																				OA PA	0.054
Unpaired t test																				OA PA	0.049
P value	0.0051																			OA PA L	0.107
P value summary	**																			OA PA L	0.119
Significantly different (P < 0.05)?	Yes																			OA PA L	0.119
One- or two-tailed P value?	Two-tailed
t, df	t=5.578, df=4
																				E (PA)	0.033
Table Analyzed	FIG 3M																			E (PA)	0.051
																				E (PA)	0.05
Column H	PA-12h → LPS-24h
vs.	vs.
Column B	LPS-24h
Unpaired t test
P value	<0.0001
P value summary	****
Significantly different (P < 0.05)?	Yes
One- or two-tailed P value?	Two-tailed
t, df	t=20.92, df=4
Table Analyzed	FIG 3M
Column I	PA/FB1-12h → LPS-24h
vs.	vs.
Column B	LPS-24h
Unpaired t test
P value	<0.0001
P value summary	****
Significantly different (P < 0.05)?	Yes
One- or two-tailed P value?	Two-tailed
t, df	t=36.81, df=4
Table Analyzed	FIG 3M
Column I	PA/FB1-12h → LPS-24h
vs.	vs.
Column H	PA-12h → LPS-24h
Unpaired t test
P value	0.0046
P value summary	**
Significantly different (P < 0.05)?	Yes
One- or two-tailed P value?	Two-tailed
t, df	t=5.722, df=4
Table Analyzed	FIG 5C
Column C	24h-LPS
vs.	vs.
Column A	Naive
Unpaired t test
P value	<0.0001
P value summary	****
Significantly different (P < 0.05)?	Yes
One- or two-tailed P value?	Two-tailed
t, df	t=18.46, df=4
Table Analyzed	FIG 5C
Column G	12h-PA + 24h-LPS
vs.	vs.
Column C	24h-LPS
Unpaired t test
P value	0.0002
P value summary	***
Significantly different (P < 0.05)?	Yes
One- or two-tailed P value?	Two-tailed
t, df	t=13.41, df=4
Table Analyzed	FIG 5C
Column I	12h-OA/PA + 24h-LPS
vs.	vs.
Column G	12h-PA + 24h-LPS
Unpaired t test
P value	0.0003
P value summary	***
Significantly different (P < 0.05)?	Yes
One- or two-tailed P value?	Two-tailed
t, df	t=12.00, df=4
Table Analyzed	FIG 5C
Column I	12h-OA/PA + 24h-LPS
vs.	vs.
Column C	24h-LPS
Unpaired t test
P value	0.0082
P value summary	**
Significantly different (P < 0.05)?	Yes
One- or two-tailed P value?	Two-tailed
t, df	t=4.879, df=4

## Sheet: Figure 3M (2)
Software Version	3.10.06
Experiment File Path:
Protocol File Path:
Plate Number	Plate 1	IL-1b
Date	2021-12-05
Time	00:38:09
Reader Type:	Synergy HTX
Reader Serial Number:	2009032
Reading Type	Reader
Procedure Details
Plate Type	96 WELL PLATE (Use plate lid)
Eject plate on completion
Read	Absorbance Endpoint
	Full Plate
	Wavelengths: 450
	Read Speed: Normal, Delay: 100 msec, Measurements/Data Point: 8
Layout
		1	2	3	4	5	6	7	8	9	10	11	12
	A	STD1	STD1	SPL1	SPL9	SPL17	SPL25							Well ID
		500	500											Conc/Dil
	B	STD2	STD2	SPL2	SPL10	SPL18	SPL26							Well ID
		250	250											Conc/Dil
	C	STD3	STD3	SPL3	SPL11	SPL19	SPL27							Well ID
		125	125											Conc/Dil
	D	STD4	STD4	SPL4	SPL12	SPL20	SPL28							Well ID
		62.5	62.5											Conc/Dil
	E	STD5	STD5	SPL5	SPL13	SPL21	SPL29							Well ID
		31.3	31.3											Conc/Dil
	F	STD6	STD6	SPL6	SPL14	SPL22	SPL30							Well ID
		15.6	15.6											Conc/Dil
	G	STD7	STD7	SPL7	SPL15	SPL23	SPL31							Well ID
		7.8	7.8											Conc/Dil
	H	BLK	BLK	SPL8	SPL16	SPL24	SPL32							Well ID
														Conc/Dil
Results
Actual Temperature:	21
		1	2	3	4	5	6	7	8	9	10	11	12				Blanked 450
	A	1.894	1.804	0.143	0.103	0.434	0.085							450				1	2	3	4	5	6	7	8
		1.804	1.715	0.054	0.013	0.345	-0.005							Blank 450			A	1.804	1.715	0.054	0.013	0.345	-0.005
	B	1.081	1.137	0.146	0.099	0.47	0.087							450			B	0.992	1.047	0.057	0.01	0.381	-0.002
		0.992	1.047	0.057	0.01	0.381	-0.002							Blank 450			C	0.511	0.502	0.051	0.008	0.284	-0.004
	C	0.6	0.592	0.14	0.098	0.374	0.085							450			D	0.287	0.261	0.045	-0.005	0.292
		0.511	0.502	0.051	0.008	0.284	-0.004							Blank 450			E	0.124	0.136	0.055	-0.008	0.274
	D	0.376	0.35	0.134	0.084	0.381	0.081							450			F	0.081	0.085	0.056	0.001	0.076
		0.287	0.261	0.045	-0.005	0.292	-0.008							Blank 450			G	0.03	0.033	-0.006	-0.004	0.061
	E	0.213	0.226	0.144	0.081	0.363	0.074							450			H	-0.002	0.002	0.003	0.395	0.063
		0.124	0.136	0.055	-0.008	0.274	-0.015							Blank 450
	F	0.171	0.174	0.145	0.09	0.165	0.086							450
		0.081	0.085	0.056	0.001	0.076	-0.003							Blank 450			Average Absorbance
	G	0.119	0.122	0.083	0.085	0.15	0.083							450			Standards			FB plate		FB plate		FB plate
		0.03	0.033	-0.006	-0.004	0.061	-0.006							Blank 450		IL-1b	500	1.7595		FB L	0.054	PA	-0.006	PA FB	-0.008
	H	0.088	0.091	0.092	0.484	0.152	0.077							450			250	1.0195		FB L	0.057	PA	0.003	PA FB	0.001
		-0.002	0.002	0.003	0.395	0.063	-0.012							Blank 450			125	0.5065		FB L	0.051	PA	0.013	PA FB	-0.004
																	62.5	0.274		L	0.045	FB	0.01	PA L	0.395
																	31.3	0.13		L	0.055	FB	0.008	PA L	0.345
																	15.6	0.083		L	0.056	FB	-0.005	PA L	0.381
																	7.8	0.0315
																				FB plate		FB/OA plates
																				PA FB L	0.284	N (for FB)	-0.005
																				PA FB L	0.292	N (for FB)	-0.002
																				PA FB L	0.274	N (for FB)	-0.004
																				E (0.97%) +L	0.076
																				E (0.97%) +L	0.061
																				E (0.97%) +L	0.063
