# Supplementary material for: Enriched dietary saturated fatty acids induce trained immunity via ceramide production that enhances severity of endotoxemia and clearance of infection
Source: eLife. 2022 Oct 20;11:e76744. doi: 10.7554/eLife.76744 (PMC9642993; doi:10.7554/eLife.76744)
Supplement: Figure 4—figure supplement 1—source data 1. [file elife-76744-fig4-figsupp1-data1.xlsx]

## Sheet: Figure S7A
standard	conc. ug/mL		Data from OSU Linus Pauling Institute					Sample	Area	conc. (ug/mL) from std	Normalized conc. (ug/ mL of serum)	umol	PA MW
PA std 1	0.1	8520						2h veh 1	41356	1.177	29.43	114.758	256.42
PA std 2	0.2	13509						2h veh 2	66993	2.029	50.72	197.782
PA std 3	0.5	29546						2h veh 3	86240	2.668	66.7	260.112
PA std 4	1	34157						2h PA 1	77049	2.363	59.07	230.346
PA std 5	2	62993						2h PA 2	108437	3.405	85.13	331.996
PA std 6	5	146290						2h PA 3	137369	4.366	109.16	425.69
PA std 7	10	312420						5h veh 1	73120	2.232	55.8	217.622
								5h veh 2	58884	1.759	43.98	171.522
								5h veh 3	76606	2.348	58.7	228.911
								5h PA 1	59511	1.78	44.5	173.551
								5h PA 2	80229	2.468	61.71	240.646
								5h PA 3	87464	2.709	67.71	264.075

## Sheet: Figure S7B 0-6h
11.3.2020 12 h PA, Balb/c mice
M#	Group	LPS (mg/kg)	Weight (g) 0h	Temp (℃) 0h	Weight (g) 2h	Temp (℃) 2h	Weight (g) 4h	Temp (℃) 4h	Weight (g) 6h	Temp (℃) 6h
1	Veh	10	20.86	37	21.05	34.3	19.85	35.9	19.41	36.1
2	Veh	10	22.02	37.2	21.69	34.3	21.43	35.3	20.94	35.5
3	Veh	10	19.83	36.4	20.05	34.5	19.54	36.3	18.97	35.8
4	0H PA	10	22.31	37.8	21.28	33.7	21.19	33.2	20.82	34.7
5	0H PA	10	22.81	38.3	21.84	31.9	21.7	34.8	21.26	34.3
6	0H PA	10	20.82	36.8	20	34.1	19.23	34	19.02	36.7
7	3H PA	10	21.8	37.6	21.93	33.8	21.17	34.5	21.06	34.9
8	3H PA	10	22.45	37.3	22.11	34.8	21.2	34.1	20.94	34.8
9	3H PA	10	21.16	37.2	21.01	32.8	20.66	33.8	20.51	32.9
10	6H PA	10	22.37	37.3	21.79	34.5	21.07	36.4	20.98	37.1
11	6H PA	10	21.12	37.4	21.23	34.3	20.36	34.4	20.15	35.5
12	6H PA	10	20.56	36.7	19.8	35.9	19.05	34.3	19.08	34.3
13	12H PA	10	23.31	37.6	22.1	34.1	21.75	33.9	21.56	34.4
14	12H PA	10	21.91	35.9	20.83	33.7	20.11	32.2	20.06	33.5
15	12H PA	10	20.79	36.8	19.94	33.8	19.09	33.1	19.01	32.7
Delta Temp (℃) M#	Group	LPS (mg/kg)	Temp (℃) 0h	Temp (℃) 2h	Temp (℃) 4h	Temp (℃) 6h
1	Veh	10	37	-2.7	-1.1	-0.9
2	Veh	10	37.2	-2.9	-1.9	-1.7
3	Veh	10	36.4	-1.9	-0.1	-0.6
4	0H PA	10	37.8	-4.1	-4.6	-3.1
5	0H PA	10	38.3	-6.4	-3.5	-4
6	0H PA	10	36.8	-2.7	-2.8	-0.1
7	3H PA	10	37.6	-3.8	-3.1	-2.7
8	3H PA	10	37.3	-2.5	-3.2	-2.5
9	3H PA	10	37.2	-4.4	-3.4	-4.3
10	6H PA	10	37.3	-2.8	-0.9	-0.2
11	6H PA	10	37.4	-3.1	-3	-1.9
12	6H PA	10	36.7	-0.8	-2.4	-2.4
13	12H PA	10	37.6	-3.5	-3.7	-3.2
14	12H PA	10	35.9	-2.2	-3.7	-2.4
15	12H PA	10	36.8	-3	-3.7	-4.1

## Sheet: Figure S7B 8-14h
M#	Group	LPS (mg/kg)	Weight (g) 0h	Temp (℃) 0h	Weight (g) 8h	Temp (℃) 8h	Weight (g) 10h	Temp (℃) 10h	Weight (g) 12h	Temp (℃) 12h	Weight (g) 14h	Temp (℃) 14h
1	Veh	10	20.86	37	19.14	36.5	18.99	36	18.99	36	18.9	35.3
2	Veh	10	22.02	37.2	20.75	35.1	20.28	36.4	20.2	36.8	19.95	36.1
3	Veh	10	19.83	36.4	18.78	35.7	18.81	36.2	18.5	36.6	18.38	36.1
4	0H PA	10	22.31	37.8	20.64	34.8	20.43	36.1	20.24	36.8	20.16	36
5	0H PA	10	22.81	38.3	21.05	34.7	20.78	35.4	20.54	36.3	20.49	37.1
6	0H PA	10	20.82	36.8	18.82	34.8	18.65	35.5	18.35	36.1	18.35	35.7
7	3H PA	10	21.8	37.6	20.78	34.6	20.59	35.4	20.45	36	20.42	36.4
8	3H PA	10	22.45	37.3	20.86	33.3	20.69	34.6	20.41	35.4	20.4	35.1
9	3H PA	10	21.16	37.2	20.29	34.2	20.08	35.5	19.85	36.7	19.73	35.8
10	6H PA	10	22.37	37.3	20.86	36.2	20.66	35.9	20.4	36.3	20.36	36.8
11	6H PA	10	21.12	37.4	20.06	34	19.87	34.1	19.67	35.3	19.6	35.6
12	6H PA	10	20.56	36.7	19.24	33.6	18.85	33.8	18.57	35.5	18.97	35.7
13	12H PA	10	23.31	37.6	21.5	34.6	21.42	33.7	21.4	33.3	21.14	32.2
14	12H PA	10	21.91	35.9	20.03	32.7	19.86	31	19.79	32.7	19.57	33.2
15	12H PA	10	20.79	36.8	19.02	31.4	18.82	31.2	18.77	30.5	18.6	29.9
Delta Temp (℃) M#	Group	LPS (mg/kg)	Temp (℃) 0h	Temp (℃) 8h	Temp (℃) 10h	Temp (℃) 12h	Temp (℃) 14h
1	Veh	6	37	-0.5	-1	-1	-1.7
2	Veh	6	37.2	-2.1	-0.8	-0.4	-1.1
3	Veh	6	36.4	-0.7	-0.2	0.2	-0.3
4	0H PA	6	37.8	-3	-1.7	-1	-1.8
5	0H PA	7	38.3	-3.6	-2.9	-2	-1.2
6	0H PA	7	36.8	-2	-1.3	-0.7	-1.1
7	3H PA	7	37.6	-3	-2.2	-1.6	-1.2
8	3H PA	7	37.3	-4	-2.7	-1.9	-2.2
9	3H PA	8	37.2	-3	-1.7	-0.5	-1.4
10	6H PA	8	37.3	-1.1	-1.4	-1	-0.5
11	6H PA	8	37.4	-3.4	-3.3	-2.1	-1.8
12	6H PA	8	36.7	-3.1	-2.9	-1.2	-1
13	12H PA	10	37.6	-3	-3.9	-4.3	-5.4
14	12H PA	10	35.9	-3.2	-4.9	-3.2	-2.7
15	12H PA	10	36.8	-5.4	-5.6	-6.3	-6.9

## Sheet: Figure S7B 16-22h
M#	Group	LPS (mg/kg)	Weight (g) 0h	Temp (℃) 0h	Weight (g) 16h	Temp (℃) 16h	Weight (g) 18h	Temp (℃) 18h	Weight (g) 20h	Temp (℃) 20h	Weight (g) 22h	Temp (℃) 22h
1	Veh	10	20.86	37	18.79	35.8	18.72	35.4	18.55	36.1	18.26	35.5
2	Veh	10	22.02	37.2	19.8	36.6	19.8	36.2	19.46	36.3	19.34	36.7
3	Veh	10	19.83	36.4	18.16	36.1	18.18	36.3	18.13	36.7	17.89	36.4
4	0H PA	10	22.31	37.8	19.9	36.1	19.92	36.3	19.75	35.7	19.55	31.6
5	0H PA	10	22.81	38.3	20.34	37.5	20.34	37.3	20.3	34.8	20.3	37.8
6	0H PA	10	20.82	36.8	18.31	37.2	18.05	37	17.92	36.1	17.67	35
7	3H PA	10	21.8	37.6	20.08	36.3	19.96	36.2	19.84	35.9	19.47	36
8	3H PA	10	22.45	37.3	20.42	36	20.05	36.8	19.22	37.2	19.15	37.5
9	3H PA	10	21.16	37.2	19.54	36.2	19.37	36.3	19.11	36.1	19.06	36.3
10	6H PA	10	22.37	37.3	20.09	37	19.97	36.2	19.88	36.9	19.76	37.1
11	6H PA	10	21.12	37.4	19.52	37.2	19.38	35.4	19.21	36.6	19.05	36.6
12	6H PA	10	20.56	36.7	18.46	37.4	18.41	36	18.3	36.5	18.23	36.3
13	12H PA	10	23.31	37.6	21.05	32.8	20.94	34.8	20.94	34.9	20.85	35.2
14	12H PA	10	21.91	35.9	19.7	33.5	19.65	34.2	19.55	34.2	19.48	34.2
15	12H PA	10	20.79	36.8	18.54	29.3	18.55	31.7	18.43	32.3	18.38	32.1
Delta Temp (℃) M#	Group	LPS (mg/kg)	Temp (℃) 0h	Temp (℃) 16h	Temp (℃) 18h	Temp (℃) 20h	Temp (℃) 22h
1	Veh	6	37	-1.2	-1.6	-0.9	-1.5
2	Veh	6	37.2	-0.6	-1	-0.9	-0.5
3	Veh	6	36.4	-0.3	-0.1	0.3	0
4	0H PA	6	37.8	-1.7	-1.5	-2.1	-6.2
5	0H PA	7	38.3	-0.8	-1	-3.5	-0.5
6	0H PA	7	36.8	0.4	0.2	-0.7	-1.8
7	3H PA	7	37.6	-1.3	-1.4	-1.7	-1.6
8	3H PA	7	37.3	-1.3	-0.5	-0.1	0.2
9	3H PA	8	37.2	-1	-0.9	-1.1	-0.9
10	6H PA	8	37.3	-0.3	-1.1	-0.4	-0.2
11	6H PA	8	37.4	-0.2	-2	-0.8	-0.8
12	6H PA	8	36.7	0.7	-0.7	-0.2	-0.4
13	12H PA	10	37.6	-4.8	-2.8	-2.7	-2.4
14	12H PA	10	35.9	-2.4	-1.7	-1.7	-1.7
15	12H PA	10	36.8	-7.5	-5.1	-4.5	-4.7

## Sheet: Figure 4S1B 24-30h
M#	Group	LPS (mg/kg)	Weight (g) 0h	Temp (℃) 0h	Weight (g) 24h	Temp (℃) 24h	Weight (g) 26h	Temp (℃) 26h	Weight (g) 28h	Temp (℃) 28h	Weight (g) 30h	Temp (℃) 30h
1	Veh	10	20.86	37	18.19	35.1	18.03	36	17.96	35.4	17.98	36.4
2	Veh	10	22.02	37.2	19.28	36.3	18.98	35.8	18.88	36.3	18.8	35.8
3	Veh	10	19.83	36.4	17.89	36.9	17.72	36.3	17.42	36.6	17.3	36.1
4	0H PA	10	22.31	37.8	19.51	32.1	19.4	-	19.06	-	18.98	-
5	0H PA	10	22.81	38.3	20.23	37.4	19.94	36.8	19.7	37.4	19.57	36.6
6	0H PA	10	20.82	36.8	17.68	35.8	17.6	36.1	17.5	36.4	17.44	36.6
7	3H PA	10	21.8	37.6	19.37	35.6	19.16	35.5	19.1	35.8	19.07	35.3
8	3H PA	10	22.45	37.3	19.85	35.3	19.71	36	19.56	36.4	19.56	35.4
9	3H PA	10	21.16	37.2	18.96	36.5	18.58	36.1	18.51	36.3	18.51	35.8
10	6H PA	10	22.37	37.3	19.68	36.6	19.42	36.4	19.43	36.7	19.38	36.2
11	6H PA	10	21.12	37.4	18.75	35.8	18.65	36.2	18.58	36	18.62	36.6
12	6H PA	10	20.56	36.7	18.17	36.5	17.95	36.1	17.96	35.8	17.99	36.9
13	12H PA	10	23.31	37.6	20.77	35.6	20.69	35.5	20.52	35.4	20.52	35
14	12H PA	10	21.91	35.9	19.42	33.5	19.13	34.3	18.88	35.3	18.98	34.4
15	12H PA	10	20.79	36.8	18.21	33.4	18.25	33.2	18.08	32.3	18.09	32.7
Delta Temp (℃) M#	Group	LPS (mg/kg)	Temp (℃) 0h	Temp (℃) 24h	Temp (℃) 26h	Temp (℃) 28h	Temp (℃) 30h
1	Veh	6	37	-1.9	-1	-1.6	-0.6
2	Veh	6	37.2	-0.9	-1.4	-0.9	-1.4
3	Veh	6	36.4	0.5	-0.1	0.2	-0.3
4	0H PA	6	37.8	-5.7
5	0H PA	7	38.3	-0.9	-1.5	-0.9	-1.7
6	0H PA	7	36.8	-1	-0.7	-0.4	-0.2
7	3H PA	7	37.6	-2	-2.1	-1.8	-2.3
8	3H PA	7	37.3	-2	-1.3	-0.9	-1.9
9	3H PA	8	37.2	-0.7	-1.1	-0.9	-1.4
10	6H PA	8	37.3	-0.7	-0.9	-0.6	-1.1
11	6H PA	8	37.4	-1.6	-1.2	-1.4	-0.8
12	6H PA	8	36.7	-0.2	-0.6	-0.9	0.2
13	12H PA	10	37.6	-2	-2.1	-2.2	-2.6
14	12H PA	10	35.9	-2.4	-1.6	-0.6	-1.5
15	12H PA	10	36.8	-3.4	-3.6	-4.5	-4.1

## Sheet: Figure 4S1B 32-38h
M#	Group	LPS (mg/kg)	Weight (g) 0h	Temp (℃) 0h	Weight (g) 32h	Temp (℃) 32h	Weight (g) 34h	Temp (℃) 34h	Weight (g) 36h	Temp (℃) 36h	Weight (g) 38h	Temp (℃) 38h
1	Veh	10	20.86	37	17.93	35.2	17.93	35.9	17.73	35.7	17.85	35.2
2	Veh	10	22.02	37.2	18.78	36.4	18.71	35.7	18.43	36.3	18.35	35.3
3	Veh	10	19.83	36.4	17.27	35.7	17.23	36.5	17.49	36.9	17.74	36.1
4	0H PA	10	22.31	37.8	18.84	-	18.88	-	19.03	-	19.06	-
5	0H PA	10	22.81	38.3	19.46	37.1	19.37	36.8	19.48	36.8	19.61	36.4
6	0H PA	10	20.82	36.8	17.36	35.8	17.13	36.1	17.51	35.9	17.7	35.5
7	3H PA	10	21.8	37.6	18.92	35.5	18.87	35.2	18.77	34.9	18.7	34.8
8	3H PA	10	22.45	37.3	19.56	36	19.03	36.2	19.2	36	19.14	35.6
9	3H PA	10	21.16	37.2	18.31	36.1	18.3	36.5	18.19	36	18.15	35.9
10	6H PA	10	22.37	37.3	18.97	35.7	18.95	36.1	18.9	36.2	19	35.7
11	6H PA	10	21.12	37.4	18.54	36.5	18.51	35.6	18.45	36.4	18.4	35.9
12	6H PA	10	20.56	36.7	17.94	36.1	17.96	35.3	17.79	36.1	17.77	35.6
13	12H PA	10	23.31	37.6	20.49	35.7	20.39	35.3	20.04	35.3	20.15	35
14	12H PA	10	21.91	35.9	18.92	34.2	18.61	33.7	19.01	34.2	18.92	33.6
15	12H PA	10	20.79	36.8	17.96	32.7	17.91	33.5	17.96	34	17.65	33.7
Delta Temp (℃) M#	Group	LPS (mg/kg)	Temp (℃) 0h	Temp (℃) 32h	Temp (℃) 34h	Temp (℃) 36h	Temp (℃) 38h
1	Veh	10	37	-1.8	-1.1	-1.3	-1.8
2	Veh	10	37.2	-0.8	-1.5	-0.9	-1.9
3	Veh	10	36.4	-0.7	0.1	0.5	-0.3
4	0H PA	10	37.8
5	0H PA	10	38.3	-1.2	-1.5	-1.5	-1.9
6	0H PA	10	36.8	-1	-0.7	-0.9	-1.3
7	3H PA	10	37.6	-2.1	-2.4	-2.7	-2.8
8	3H PA	10	37.3	-1.3	-1.1	-1.3	-1.7
9	3H PA	10	37.2	-1.1	-0.7	-1.2	-1.3
10	6H PA	10	37.3	-1.6	-1.2	-1.1	-1.6
11	6H PA	10	37.4	-0.9	-1.8	-1	-1.5
12	6H PA	10	36.7	-0.6	-1.4	-0.6	-1.1
13	12H PA	10	37.6	-1.9	-2.3	-2.3	-2.6
14	12H PA	10	35.9	-1.7	-2.2	-1.7	-2.3
15	12H PA	10	36.8	-4.1	-3.3	-2.8	-3.1

## Sheet: Figure 4S1B 40-46
M#	Group	LPS (mg/kg)	Weight (g) 0h	Temp (℃) 0h	Weight (g) 40h	Temp (℃) 40h	Weight (g) 42h	Temp (℃) 42h	Weight (g) 44h	Temp (℃) 44h	Weight (g) 46h	Temp (℃) 46h
1	Veh	10	20.86	37	17.89	35	17.65	35.1	17.66	34.8	18.09	35.3
2	Veh	10	22.02	37.2	18.25	34.6	18.09	35	17.96	34.5	18.07	34.7
3	Veh	10	19.83	36.4	17.52	35.7	17.47	36	17.32	34	17.25	30.5
4	0H PA	10	22.31	37.8	18.79	-	18.71	-	18.56	-	18.71	-
5	0H PA	10	22.81	38.3	19.42	36.2	19.5	36.5	19.33	36.2	19.51	36.3
6	0H PA	10	20.82	36.8	17.42	35.7	17.4	36	17.32	34.8	17.32	35.5
7	3H PA	10	21.8	37.6	18.32	34.5	18.29	35.1	18.6	35.8	18.65	35.5
8	3H PA	10	22.45	37.3	18.97	36	18.98	35.8	18.9	35.6	18.99	36.7
9	3H PA	10	21.16	37.2	17.96	35.5	18.06	35.6	17.84	35.8	17.82	36.2
10	6H PA	10	22.37	37.3	18.88	35.2	18.82	35.5	18.78	36	19.01	36
11	6H PA	10	21.12	37.4	18.35	35.3	18.36	35.5	18.23	35.4	18.19	35.6
12	6H PA	10	20.56	36.7	17.79	35.2	17.73	35.9	17.74	36.1	17.92	36.2
13	12H PA	10	23.31	37.6	20.09	35	19.99	34.8	19.98	35	20.27	35.8
14	12H PA	10	21.91	35.9	18.74	34.1	18.77	33.9	18.68	32.9	18.73	34.3
15	12H PA	10	20.79	36.8	17.43	33.5	17.45	33.9	17.31	33.8	17.27	33.9
Delta Temp (℃) M#	Group	LPS (mg/kg)	Temp (℃) 0h	Temp (℃) 40h	Temp (℃) 42h	Temp (℃) 44h	Temp (℃) 46h
1	Veh	10	37	-2	-1.9	-2.2	-1.7
2	Veh	10	37.2	-2.6	-2.2	-2.7	-2.5
3	Veh	10	36.4	-0.7	-0.4	-2.4	-5.9
4	0H PA	10	37.8
5	0H PA	10	38.3	-2.1	-1.8	-2.1	-2
6	0H PA	10	36.8	-1.1	-0.8	-2	-1.3
7	3H PA	10	37.6	-3.1	-2.5	-1.8	-2.1
8	3H PA	10	37.3	-1.3	-1.5	-1.7	-0.6
9	3H PA	10	37.2	-1.7	-1.6	-1.4	-1
10	6H PA	10	37.3	-2.1	-1.8	-1.3	-1.3
11	6H PA	10	37.4	-2.1	-1.9	-2	-1.8
12	6H PA	10	36.7	-1.5	-0.8	-0.6	-0.5
13	12H PA	10	37.6	-2.6	-2.8	-2.6	-1.8
14	12H PA	10	35.9	-1.8	-2	-3	-1.6
15	12H PA	10	36.8	-3.3	-2.9	-3	-2.9

## Sheet: Figure 4S1B 48-60h
M#	Group	LPS (mg/kg)	Weight (g) 0h	Temp (℃) 0h	Weight (g) 48h	Temp (℃) 48h	Weight (g) 50h	Temp (℃) 50h	Weight (g) 55h	Temp (℃) 55h	Weight (g) 80h	Temp (℃) 80h	Weight (g) 104h	Temp (℃) 104h
1	Veh	10	20.86	37	17.85	35.4	17.97	35.2	17.61	35.8	18.81	36.2	19.25	36.8
2	Veh	10	22.02	37.2	18.1	35.3	18.41	35.4	18.12	35	19.23	36.3	19.89	36.7
3	Veh	10	19.83	36.4	17.17	35.7	17.58	36.6	17.42	36	18.02	36.1	18.75	37.2
4	0H PA	10	22.31	37.8	18.7	-	18.63	-	18.84	-	19.59	-	20.11	-
5	0H PA	10	22.81	38.3	19.42	37.1	19.71	36.9	19.84	37.4	19.78	36.9	20.09	37.1
6	0H PA	10	20.82	36.8	17.13	36	17.4	36.1	17.4	36.8	17.98	36.1	18.63	36.1
7	3H PA	10	21.8	37.6	18.74	35	18.57	35.5	18.77	36.3	19.27	36.1	19.34	37.1
8	3H PA	10	22.45	37.3	19.49	36.1	19.48	36	19.41	36.4	20.61	36.5	20.53	36.8
9	3H PA	10	21.16	37.2	17.95	35.5	17.87	35.8	17.78	35.6	18.38	36.3	18.39	36.4
10	6H PA	10	22.37	37.3	19.19	36.7	19.34	36	19.02	36	20.01	36	20.3	36.9
11	6H PA	10	21.12	37.4	18.23	35.7	18.31	35.5	18.13	35.6	18.88	36.4	19.44	37
12	6H PA	10	20.56	36.7	17.88	36	17.88	36.1	17.67	35.5	18.21	36	18.61	37.1
13	12H PA	10	23.31	37.6	20.18	36.2	20.3	36	20.43	35.9	20.84	36.9	21.76	36.6
14	12H PA	10	21.91	35.9	18.7	33.9	18.67	34.3	18.41	34.4	18.97	35.7	19.51	36.1
15	12H PA	10	20.79	36.8	17.21	33.4	17.25	33.7	17.19	34.5	17.65	36.3	18.32	36.8
Delta Temp (℃) M#	Group	LPS (mg/kg)	Temp (℃) 0h	Temp (℃) 48h	Temp (℃) 50h	Temp (℃) 55h	Temp (℃) 80h	Temp (℃) 104h
1	Veh	10	37	-1.6	-1.8	-1.2	-0.8	-0.2
2	Veh	10	37.2	-1.9	-1.8	-2.2	-0.9	-0.5
3	Veh	10	36.4	-0.7	0.2	-0.4	-0.3	0.8
4	0H PA	10	37.8
5	0H PA	10	38.3	-1.2	-1.4	-0.9	-1.4	-1.2
6	0H PA	10	36.8	-0.8	-0.7	0	-0.7	-0.7
7	3H PA	10	37.6	-2.6	-2.1	-1.3	-1.5	-0.5
8	3H PA	10	37.3	-1.2	-1.3	-0.9	-0.8	-0.5
9	3H PA	10	37.2	-1.7	-1.4	-1.6	-0.9	-0.8
10	6H PA	10	37.3	-0.6	-1.3	-1.3	-1.3	-0.4
11	6H PA	10	37.4	-1.7	-1.9	-1.8	-1	-0.4
12	6H PA	10	36.7	-0.7	-0.6	-1.2	-0.7	0.4
13	12H PA	10	37.6	-1.4	-1.6	-1.7	-0.7	-1
14	12H PA	10	35.9	-2	-1.6	-1.5	-0.2	0.2
15	12H PA	10	36.8	-3.4	-3.1	-2.3	-0.5	0

## Sheet: Figure 4S1C
11.3.2020 12 h PA, 10mg/kg LPS, Balb/c mice, Survival (Prism)
Time (h)	Veh	0h PA	3h PA	6h PA
50	0	0	0	0
50	0	0	0	0
50	0	0	0	0
50	0	0	0	0
50	0	0	0	0

## Sheet: Figure 4S1D + STATS
Glucose (mg/dL), Balb/c mice, 12h PA + 10mg/kg LPS, 12.15.2020
M#	Veh (0h post-LPS)	Veh (20h post-LPS)	12h PA (0h post-LPS)	12h PA (20h post-LPS)		Table Analyzed	Fig S7D
1	100	27	107	25
2	110	21	120	42		Column D	12h PA (20h)
3	111	52	99	33		vs.	vs.
			105	53		Column C	12h PA (0h)
						Mann Whitney test
						P value	0.0286
						Exact or approximate P value?	Exact
						P value summary	*
						Significantly different (P < 0.05)?	Yes
						One- or two-tailed P value?	Two-tailed
						Sum of ranks in column C,D	26 , 10
						Mann-Whitney U	0
