# Supplementary material for: Enriched dietary saturated fatty acids induce trained immunity via ceramide production that enhances severity of endotoxemia and clearance of infection
Source: eLife. 2022 Oct 20;11:e76744. doi: 10.7554/eLife.76744 (PMC9642993; doi:10.7554/eLife.76744)
Supplement: Figure 4—source data 1. [file elife-76744-fig4-data1.xlsx]

## Sheet: Fig 4A 0 - 26h + STATS
Balb/c mice, 12h PA + 10mg/kg LPS, experiments 12.7.2020 and 12.15.2020 combined
M#	Group	Temp (℃) 0h	Temp (℃) 2h	Temp (℃) 4h	Temp (℃) 6h
1	Veh	36.5	33.7	34.5	33.9
2	Veh	37.3	35.3	34.8	33.4
3	Veh	36.8	34.1	34.8	34.9
4	12h PA	36.5	34.5	36.7	34.9
5	12h PA	36.8	35.1	35.3	32.9
6	12h PA	36	35.2	35.9	33.3
M#	Group	Temp (℃) 8h	Temp (℃) 10h	Temp (℃) 12h	Temp (℃) 14h
1	Veh	31.6	32.3	31.1	30.6
2	Veh	30.4	30.6	31.6	30.5
3	Veh	34.3	34	34.4	34.6
4	12h PA	33.6	34.7	32.1	25.5
5	12h PA	30.9	29.5	29.9	24.5
6	12h PA	31.7	30	28.4	23.4
M#	Group	Temp (℃) 16h	Temp (℃) 18h	Temp (℃) 20h	Temp (℃) 22h	Temp (℃) 24h	Temp (℃) 26h
1	Veh	31.6	32.2	32.6	34.1	34.4	34
2	Veh	28.1	30.7	28.9	27	31.8	30.1
3	Veh	35.1	34.7	34.9	35.5	35.7	35.4
4	12h PA	24.3	23.6	23.5	23.5	x	x
5	12h PA	22.8	22.9	22.2	x	x	x
6	12h PA	21.5	x	x	x	23.3	x
Delta Temp (℃) M#	Group	Temp (℃) 0h	Temp (℃) 2h	Temp (℃) 4h	Temp (℃) 6h	Temp (℃) 8h	Temp (℃) 10h	Temp (℃) 12h	Temp (℃) 14h
1	Veh	0	-2.8	-2	-2.6	-4.9	-4.2	-5.4	-5.9
2	Veh	0	-2	-2.5	-3.9	-6.9	-6.7	-5.7	-6.8
3	Veh	0	-2.7	-2	-1.9	-2.5	-2.8	-2.4	-2.2
4	12h PA	0	-2	0.2	-1.6	-2.9	-1.8	-4.4	-11
5	12h PA	0	-1.7	-1.5	-3.9	-5.9	-7.3	-6.9	-12.3
6	12h PA	0	-0.8	-0.1	-2.7	-4.3	-6	-7.6	-12.6
Delta Temp (℃) M#	Group	Temp (℃) 16h	Temp (℃) 18h	Temp (℃) 20h	Temp (℃) 22h	Temp (℃) 24h	Temp (℃) 26h
1	Veh	-4.9	-4.3	-3.9	-2.4	-2.1	-2.5
2	Veh	-9.2	-6.6	-8.4	-10.3	-5.5	-7.2
3	Veh	-1.7	-2.1	-1.9	-1.3	-1.1	-1.4
4	12h PA	-12.2	-12.9	-13	-13
5	12h PA	-14	-13.9	-14.6
6	12h PA	-14.5
M#	Group	Temp (℃) 0h	Temp (℃) 2h	Temp (℃) 4h	Temp (℃) 6h
1	Veh	36.5	34.3	35.9	36.1
2	Veh	36.4	34.3	35.3	35.5
3	Veh	37	34.5	36.3	35.8
4	12H PA	36.8	34.1	33.9	34.4
5	12H PA	35.7	33.7	32.2	33.5
6	12H PA	36.7	33.8	33.1	32.7
M#	Group	Temp (℃) 8h	Temp (℃) 10h	Temp (℃) 12h	Temp (℃) 14h
1	Veh	36.5	36	36	35.3
2	Veh	35.1	36.4	36.8	36.1
3	Veh	35.7	36.2	36.6	36.1
4	12H PA	34.6	33.7	33.3	32.2
5	12H PA	32.7	31	32.7	33.2
6	12H PA	31.4	31.2	30.5	29.9
M#	Group	Temp (℃) 16h	Weight (g) 18h	Temp (℃) 20h	Temp (℃) 22h
1	Veh	35.8	35.4	36.1	35.5
2	Veh	36.6	36.2	36.3	36.7
3	Veh	36.1	36.3	36.7	36.4
4	12H PA	32.8	34.8	34.9	35.2
5	12H PA	33.5	34.2	34.2	34.2
6	12H PA	29.3	31.7	32.3	32.1
M#	Group	Temp (℃) 24h	Temp (℃) 26h
1	Veh	35.1	36
2	Veh	36.3	35.8
3	Veh	36.9	36.3
4	12H PA	35.6	35.5
5	12H PA	33.5	34.3
6	12H PA	33.4	33.2
Delta Temp (℃) M#	Cage#	Temp (℃) 2h	Temp (℃) 4h	Temp (℃) 6h	Temp (℃) 8h	Temp (℃) 10h	Temp (℃) 12h	Temp (℃) 14h	Temp (℃) 16h	Weight (g) 18h
1	Veh	-2.2	-0.6	-0.4	0	-0.5	-0.5	-1.2	-0.7	-1.1
2	Veh	-2.1	-1.1	-0.9	-1.3	0	0.4	-0.3	0.2	-0.2
3	Veh	-2.5	-0.7	-1.2	-1.3	-0.8	-0.4	-0.9	-0.9	-0.7
4	12H PA	-2.7	-2.9	-2.4	-2.2	-3.1	-3.5	-4.6	-4	-2
5	12H PA	-2	-3.5	-2.2	-3	-4.7	-3	-2.5	-2.2	-1.5
6	12H PA	-2.9	-3.6	-4	-5.3	-5.5	-6.2	-6.8	-7.4	-5
Delta Temp (℃) M#	Cage#	Temp (℃) 20h	Temp (℃) 22h	Temp (℃) 24h	Temp (℃) 26h
1	Veh	-0.4	-1	-1.4	-0.5
2	Veh	-0.1	0.3	-0.1	-0.6
3	Veh	-0.3	-0.6	-0.1	-0.7
4	12H PA	-1.9	-1.6	-1.2	-1.3
5	12H PA	-1.5	-1.5	-2.2	-1.4
6	12H PA	-4.4	-4.6	-3.3	-3.5
Column D	PA 12h
vs.	vs.
Column C	Veh 12h
Mann Whitney test
P value	0.0649
Exact or approximate P value?	Exact
P value summary	ns
Significantly different (P < 0.05)?	No
One- or two-tailed P value?	Two-tailed
Sum of ranks in column C,D	51 , 27
Mann-Whitney U	6
Column F	PA 14h
vs.	vs.
Column E	Veh 14h
Mann Whitney test
P value	0.0303
Exact or approximate P value?	Exact
P value summary	*
Significantly different (P < 0.05)?	Yes
One- or two-tailed P value?	Two-tailed
Sum of ranks in column E,F	52.50 , 25.50
Mann-Whitney U	4.5
Column H	PA 16h
vs.	vs.
Column G	Veh 16h
Mann Whitney test
P value	0.0411
Exact or approximate P value?	Exact
P value summary	*
Significantly different (P < 0.05)?	Yes
One- or two-tailed P value?	Two-tailed
Sum of ranks in column G,H	52 , 26
Mann-Whitney U	5

## Sheet: Figure 4B
Survival, Balb/c mice, 12h PA + 10mg/kg LPS, experiments 12.7.2020 and 12.15.2020 combined
Time (h)	Veh (10mg/kg)	12h PA (10mg/kg)
18		1
22		1
22
22
26		1
26
45	1
100	0
100	0
100	0
100	0
100	0
100		0
100		0
100		0

## Sheet: Fig 4C + STATS
	Well	Fluor	Target	Content	Sample	Cq	SQ
	A01	SYBR	Actin	Unkn	M1	23.7689							0H		5H		10H		15H								TNF Relative Expression Data
	A02	SYBR	Actin	Unkn	M2	24.2972						Mouse Number	B-Actin	TNFa	B-Actin	TNFa	B-Actin	TNFa	B-Actin	TNFa							Time (h)	Veh (10mg/kg)						12h PA (10mg/kg)
	A03	SYBR	Actin	Unkn	M3	23.0592						M1	23.7689	33.8814	26.1632	33.1321	24.3075	30.3312	22.8197	28.4178		M1-M3	Veh				0	1.13358	1.27897	1.59269	3.69983	1.19396	2.40768	1.65558	1.46785	1.34308	3.43003	2.50146	3.64328
	A04	SYBR	Actin	Unkn	M4	22.8767						M2	24.2972	36.0414	24.2736	30.8091	23.9683	30.3005	26.0883	31.9999		M4-M6	12 h PA				5	60.9994	35.3573	55.5163	32.6962	44.1551	67.6227		103.892	65.037	86.5543	71.9698	92.88
	A05	SYBR	Actin	Unkn	M5	22.8773						M3	23.0592	33.7915	24.6719	30.5924	22.8895	28.5147	20.8626	26.269		Injected with PA 12 h prior to LPS-injections.					10	57.182	41.8531	69.9211	62.9566	50.8389	82.9842	65.4844	71.8564	109.503	86.7785	88.3849	87.3811
	A06	SYBR	Actin	Unkn	M6	24.1769						M4	22.8767	33.0985	23.0189	28.5834	21.2505	26.8113	21.279	27.6415		Then blood draws were taken immediately prior to LPS-injections (0 h) and after LPS-injections (5-15 h).					15	54.5384	42.7338	34.2811	84.5596	68.04	96.5747	55.3445	64.679	83.3379	49.7807	76.3764	70.6254
												M5	22.8773	33.5545	25.6309	31.4616	26.0657	31.5999	25.4793	31.2243
												M6	24.1769	34.3116	25.6831	31.1458	24.136	29.6867	25.881	31.7389
	B01	SYBR	TNFalpha	Unkn	M1	33.8814
	B02	SYBR	TNFalpha	Unkn	M2	36.0414
	B03	SYBR	TNFalpha	Unkn	M3	33.7915			Normalizer	12
	B04	SYBR	TNFalpha	Unkn	M4	33.0985
	B05	SYBR	TNFalpha	Unkn	M5	33.5545
	B06	SYBR	TNFalpha	Unkn	M6	34.3116						0H Sample	B-actin	TNFa	△Ct	△△Ct	RQ		5H Sample	B-actin	TNFa	△Ct	△△Ct	RQ
												M1	23.7689	33.8814	10.1125	-1.88746	3.69983		M1	26.1632	33.1321	6.96895	-5.03105	32.6962
												M2	24.2972	36.0414	11.7442	-0.255757	1.19396		M2	24.2736	30.8091	6.53549	-5.46451	44.1551
												M3	23.0592	33.7915	10.7324	-1.26765	2.40768		M3	24.6719	30.5924	5.92056	-6.07944	67.6227
	C01	SYBR	Actin	Unkn	M1	26.1632						M4	22.8767	33.0985	10.2218	-1.77822	3.43003		M4	23.0189	28.5834	5.56447	-6.43553	86.5543
	C02	SYBR	Actin	Unkn	M2	24.2736						M5	22.8773	33.5545	10.6772	-1.32277	2.50146		M5	25.6309	31.4616	5.83068	-6.16932	71.9698
	C03	SYBR	Actin	Unkn	M3	24.6719						M6	24.1769	34.3116	10.1348	-1.86524	3.64328		M6	25.6831	31.1458	5.4627	-6.5373	92.88
	C04	SYBR	Actin	Unkn	M4	23.0189
	C05	SYBR	Actin	Unkn	M5	25.6309
	C06	SYBR	Actin	Unkn	M6	25.6831
												10H Sample	B-actin	TNFa	△Ct	△△Ct	RQ		15H Sample	B-actin	TNFa	△Ct	△△Ct	RQ		Time (h)	Veh (10mg/kg)						12h PA (10mg/kg)
	D01	SYBR	TNFalpha	Unkn	M1	33.1321						M1	24.3075	30.3312	6.02371	-5.97629	62.9566		M1	22.8197	28.4178	5.5981	-6.4019	84.5596		0	1.13358	1.27897	1.59269	3.69983	1.19396	2.40768	1.65558	1.46785	1.34308	3.43003	2.50146	3.64328
	D02	SYBR	TNFalpha	Unkn	M2	30.8091						M2	23.9683	30.3005	6.33214	-5.66786	50.8389		M2	26.0883	31.9999	5.91169	-6.08831	68.04		5	60.9994	35.3573	55.5163	32.6962	44.1551	67.6227		103.892	65.037	86.5543	71.9698	92.88
	D03	SYBR	TNFalpha	Unkn	M3	30.5924						M3	22.8895	28.5147	5.62524	-6.37476	82.9842		M3	20.8626	26.269	5.40643	-6.59357	96.5747		10	57.182	41.8531	69.9211	62.9566	50.8389	82.9842	65.4844	71.8564	109.503	86.7785	88.3849	87.3811
	D04	SYBR	TNFalpha	Unkn	M4	28.5834						M4	21.2505	26.8113	5.56073	-6.43927	86.7785		M4	21.279	27.6415	6.36248	-5.63752	49.7807		15	54.5384	42.7338	34.2811	84.5596	68.04	96.5747	55.3445	64.679	83.3379	49.7807	76.3764	70.6254
	D05	SYBR	TNFalpha	Unkn	M5	31.4616						M5	26.0657	31.5999	5.53427	-6.46573	88.3849		M5	25.4793	31.2243	5.74495	-6.25505	76.3764
	D06	SYBR	TNFalpha	Unkn	M6	31.1458						M6	24.136	29.6867	5.55075	-6.44925	87.3811		M6	25.881	31.7389	5.85789	-6.14211	70.6254
									STATS
									TNF
									Column D	PA 5h																Version:1.0 StartHTML:0000000105 EndHTML:0000007774 StartFragment:0000002161 EndFragment:0000007728
	E01	SYBR	Actin	Unkn	M1	24.3075			vs.	vs.																Time (h)	Veh (10mg/kg)						12h PA (10mg/kg)
	E02	SYBR	Actin	Unkn	M2	23.9683			Column C	Veh 5h																0	1.13358	1.27897	1.59269	3.69983	1.19396	2.40768	1.65558	1.46785	1.34308	3.43003	2.50146	3.64328
	E03	SYBR	Actin	Unkn	M3	22.8895																				5	60.9994	35.3573	55.5163	32.6962	44.1551	67.6227		103.892	65.037	86.5543	71.9698	92.88
	E04	SYBR	Actin	Unkn	M4	21.2505			Mann Whitney test																	10	57.182	41.8531	69.9211	62.9566	50.8389	82.9842	65.4844	71.8564	109.503	86.7785	88.3849	87.3811
	E05	SYBR	Actin	Unkn	M5	26.0657			P value	0.0087																15	54.5384	42.7338	34.2811	84.5596	68.04	96.5747	55.3445	64.679	83.3379	49.7807	76.3764	70.6254
	E06	SYBR	Actin	Unkn	M6	24.136			Exact or approximate P value?	Exact
									P value summary	**
									Significantly different (P < 0.05)?	Yes
									One- or two-tailed P value?	Two-tailed
	F01	SYBR	TNFalpha	Unkn	M1	30.3312			Sum of ranks in column C,D	22 , 44
	F02	SYBR	TNFalpha	Unkn	M2	30.3005			Mann-Whitney U	1
	F03	SYBR	TNFalpha	Unkn	M3	28.5147
	F04	SYBR	TNFalpha	Unkn	M4	26.8113			TNF
	F05	SYBR	TNFalpha	Unkn	M5	31.5999			Column F	PA 10h
	F06	SYBR	TNFalpha	Unkn	M6	29.6867			vs.	vs.
									Column E	Veh 10h
									Mann Whitney test
	G01	SYBR	Actin	Unkn	M1	22.8197			P value	0.0152
	G02	SYBR	Actin	Unkn	M2	26.0883			Exact or approximate P value?	Exact
	G03	SYBR	Actin	Unkn	M3	20.8626			P value summary	*
	G04	SYBR	Actin	Unkn	M4	21.279			Significantly different (P < 0.05)?	Yes
	G05	SYBR	Actin	Unkn	M5	25.4793			One- or two-tailed P value?	Two-tailed
	G06	SYBR	Actin	Unkn	M6	25.881			Sum of ranks in column E,F	24 , 54
									Mann-Whitney U	3
	H01	SYBR	TNFalpha	Unkn	M1	28.4178
	H02	SYBR	TNFalpha	Unkn	M2	31.9999
	H03	SYBR	TNFalpha	Unkn	M3	26.269
	H04	SYBR	TNFalpha	Unkn	M4	27.6415
	H05	SYBR	TNFalpha	Unkn	M5	31.2243
	H06	SYBR	TNFalpha	Unkn	M6	31.7389

## Sheet: Fig 4D + STATS
	IL6 Relative Expression														STATS
	Time (h)	Veh (10mg/kg)						12h PA (10mg/kg)							IL-6
	0	4.19998445927577		1.9272389579443	3.6998347	1.19396	2.40768	1.12315	1.49587	2.44433	3.43003	2.5014562	3.64328		Column D	PA 5h
	5	27.0366352281643	103.667268007855	4.70784094637308	32.696245	44.1551	67.6227		265.964	370.631	86.5543	71.969824	92.88		vs.	vs.
	10	10.0150529710429	8.52710323659222	8.09478649397084	62.9566	50.8389	82.9842	29.4937	16.8329	128.292	86.7785	88.384891	87.3811		Column C	Veh 5h
	15	4.63228728070318	2.23848790735148	5.80331344402261	84.559572	68.04	96.5747	8.13149	10.4848	58.1137	49.7807	76.376389	70.6254
															Mann Whitney test
															P value	0.0303
															Exact or approximate P value?	Exact
															P value summary	*
															Significantly different (P < 0.05)?	Yes
															One- or two-tailed P value?	Two-tailed
															Sum of ranks in column C,D	24 , 42
															Mann-Whitney U	3

## Sheet: Fig 4E
	Well	Fluor	Target	Content	Sample	Cq	SQ
	A01	SYBR	Actin	Unkn	M1	23.6673		0H					0H		5H		10H		15H
	A02	SYBR	Actin	Unkn	M2	24.3075		0H				Mouse Number	B-Actin	IL-1b	B-Actin	IL-1b	B-Actin	IL-1b	B-Actin	IL-1b										IL-1b Relative Expression Data
	A03	SYBR	Actin	Unkn	M3	23.0509		0H				M1	23.6673	27.7683	26.2589	26.9079	24.33	25.508	22.8203	24.2293		M1-M3	Veh							Time (h)	Veh (10mg/kg)						12h PA (10mg/kg)
	A04	SYBR	Actin	Unkn	M4	22.837		0H				M2	24.3075	28.0033	24.3797	24.8516	23.9818	25.6489	26.0725	28.1146		M4-M6	12 h PA							0	1346.2		227.419	238.69	316.096	471.557	393.362	291.604	408.171	628.285	260.064	430.544
	A05	SYBR	Actin	Unkn	M5	22.799		0H				M3	23.0509	26.1696	24.6311	25.2879	22.8937	23.6457	20.6159	22.1377		Injected with PA 12 h prior to LPS-injections.								5	5329.63	4446.5	86.2358	2612.16	2953.35	2598.12		3572.77	3212.09	2229.81	4263.55	4787.19
	A06	SYBR	Actin	Unkn	M6	24.1451		0H				M4	22.837	25.5417	23.0551	23.9324	21.0741	22.3911	21.1199	23.3688		Then blood draws were taken immediately prior to LPS-injections (0 h) and after LPS-injections (5-15 h).								10	1989.69	1811.51	1957.3	1810.29	1289.76	2432.03	1545.73	1948.42	2378.01	1644	1964.45	2058.46
												M5	22.799	26.7763	25.6274	25.5696	26.0188	27.0789	25.4432	27.3468										15	1828.69	1374.85	1176.36	1542.43	994.56	1426.43	1010.82	1396.16	1885.62	861.743	1094.74	1139.5
												M6	24.1451	27.3951	25.7579	25.5329	24.1017	25.0944	25.8214	27.6673
	B01	SYBR	IL-1b	Unkn	M1	27.7683		0H
	B02	SYBR	IL-1b	Unkn	M2	28.0033		0H
	B03	SYBR	IL-1b	Unkn	M3	26.1696		0H	Normalizer	12
	B04	SYBR	IL-1b	Unkn	M4	25.5417		0H
	B05	SYBR	IL-1b	Unkn	M5	26.7763		0H
	B06	SYBR	IL-1b	Unkn	M6	27.3951		0H				0H Sample	B-actin	IL-1b	△Ct	△△Ct	RQ		5H Sample	B-actin	IL-1b	△Ct	△△Ct	RQ
												M1	23.6673	27.7683	4.10101	-7.89899	238.69		M1	26.2589	26.9079	0.648972	-11.351	2612.16
												M2	24.3075	28.0033	3.69578	-8.30422	316.096		M2	24.3797	24.8516	0.471864	-11.5281	2953.35
												M3	23.0509	26.1696	3.11871	-8.88129	471.557		M3	24.6311	25.2879	0.656747	-11.3433	2598.12
	C01	SYBR	Actin	Unkn	M1	26.2589		5H				M4	22.837	25.5417	2.70472	-9.29528	628.285		M4	23.0551	23.9324	0.877297	-11.1227	2229.81
	C02	SYBR	Actin	Unkn	M2	24.3797		5H				M5	22.799	26.7763	3.97727	-8.02273	260.064		M5	25.6274	25.5696	-0.0578378	-12.0578	4263.55
	C03	SYBR	Actin	Unkn	M3	24.6311		5H				M6	24.1451	27.3951	3.24998	-8.75002	430.544		M6	25.7579	25.5329	-0.224963	-12.225	4787.19
	C04	SYBR	Actin	Unkn	M4	23.0551		5H
	C05	SYBR	Actin	Unkn	M5	25.6274		5H	12h 24h PA
	C06	SYBR	Actin	Unkn	M6	25.7579		5H
												10H Sample	B-actin	IL-1b	△Ct	△△Ct	RQ		15H Sample	B-actin	IL-1b	△Ct	△△Ct	RQ
	D01	SYBR	IL-1b	Unkn	M1	26.9079		5H				M1	24.33	25.508	1.178	-10.822	1810.29		M1	22.8203	24.2293	1.40901	-10.591	1542.43
	D02	SYBR	IL-1b	Unkn	M2	24.8516		5H				M2	23.9818	25.6489	1.66711	-10.3329	1289.76		M2	26.0725	28.1146	2.04208	-9.95792	994.56
	D03	SYBR	IL-1b	Unkn	M3	25.2879		5H				M3	22.8937	23.6457	0.752054	-11.2479	2432.03		M3	20.6159	22.1377	1.52181	-10.4782	1426.43
	D04	SYBR	IL-1b	Unkn	M4	23.9324		5H				M4	21.0741	22.3911	1.31701	-10.683	1644		M4	21.1199	23.3688	2.24889	-9.75111	861.743
	D05	SYBR	IL-1b	Unkn	M5	25.5696		5H				M5	26.0188	27.0789	1.06009	-10.9399	1964.45		M5	25.4432	27.3468	1.90362	-10.0964	1094.74
	D06	SYBR	IL-1b	Unkn	M6	25.5329		5H				M6	24.1017	25.0944	0.992649	-11.0074	2058.46		M6	25.8214	27.6673	1.84582	-10.1542	1139.5
	E01	SYBR	Actin	Unkn	M1	24.33		10H
	E02	SYBR	Actin	Unkn	M2	23.9818		10H
	E03	SYBR	Actin	Unkn	M3	22.8937		10H
	E04	SYBR	Actin	Unkn	M4	21.0741		10H
	E05	SYBR	Actin	Unkn	M5	26.0188		10H
	E06	SYBR	Actin	Unkn	M6	24.1017		10H
	F01	SYBR	IL-1b	Unkn	M1	25.508		10H
	F02	SYBR	IL-1b	Unkn	M2	25.6489		10H
	F03	SYBR	IL-1b	Unkn	M3	23.6457		10H
	F04	SYBR	IL-1b	Unkn	M4	22.3911		10H
	F05	SYBR	IL-1b	Unkn	M5	27.0789		10H
	F06	SYBR	IL-1b	Unkn	M6	25.0944		10H
	G01	SYBR	Actin	Unkn	M1	22.8203		15 H
	G02	SYBR	Actin	Unkn	M2	26.0725		15 H
	G03	SYBR	Actin	Unkn	M3	20.6159		15 H
	G04	SYBR	Actin	Unkn	M4	21.1199		15 H
	G05	SYBR	Actin	Unkn	M5	25.4432		15 H
	G06	SYBR	Actin	Unkn	M6	25.8214		15 H
	H01	SYBR	IL-1b	Unkn	M1	24.2293		15 H
	H02	SYBR	IL-1b	Unkn	M2	28.1146		15 H
	H03	SYBR	IL-1b	Unkn	M3	22.1377		15 H
	H04	SYBR	IL-1b	Unkn	M4	23.3688		15 H
	H05	SYBR	IL-1b	Unkn	M5	27.3468		15 H
	H06	SYBR	IL-1b	Unkn	M6	27.6673		15 H

## Sheet: Fig 4F
All cytokines, 12 h post PA injections, immediately prior to LPS injections (0 h)
Grouped	Veh						12h PA
TNF	1.13358	1.27897	1.59269	3.69983	1.19396	2.40768	1.65558	1.46785	1.34308	3.43003	2.50146	3.64328
IL-6	4.19998		1.92724	1.44586	1.99686	1.39262	1.12315	1.49587	2.44433	1.03549	1.85775	2.78375
IL-1β	1346.2		227.419	238.69	316.096	471.557	393.362	291.604	408.171	628.285	260.064	430.544
IL-10	<LOD	<LOD	<LOD	<LOD	<LOD	<LOD	<LOD	<LOD	<LOD	<LOD	<LOD	<LOD

## Sheet: Fig 4G 0 - 4h + STATS
Balb/c mice, 9 days PA + 7 days rest, 4.29.2021
M#	Cage#	LPS (mg/kg)	Weight (g) 0h	Temp (℃) 0h	Weight (g) 2h	Temp (℃) 2h	Weight (g) 4h	Temp (℃) 4h
1	1 = Veh	10	24.65	36.1	24.8	33.9	24.36	34.1
2	1 = Veh	10	23.25	no chip	23.4	no chip	22.63	no chip
3	1 = Veh	10	23.01	36.3	22.95	33.2	22.61	36.2
4	1 = Veh	10	20.52	36.3	20.49	34.4	20.04	35.5
5	1 = Veh	10	19.96	no chip	20.13	no chip	19.78	no chip
6	2 = PA	10	22.98	36.9	22.02	34.7	21.7	33.5
7	2 = PA	10	20.58	37	19.59	35.5	19.05	34.5
8	2 = PA	10	22.31	36.8	21.45	35.1	20.96	33.4
9	2 = PA	10	22.02	36.8	20.96	35.1	20.41	32.8
10	2 = PA	10	22.81	36.8	22.35	35.5	21.49	33.1
Delta Temp (℃) M#	Cage#	LPS (mg/kg)	Temp (℃) 0h	Temp (℃) 2h	Temp (℃) 4h
1	1 = Veh	10	0	-2.2	-2
2	1 = Veh	10	0
3	1 = Veh	10	0	-3.1	-0.1
4	1 = Veh	10	0	-1.9	-0.8
5	1 = Veh	10	0
6	2 = PA	10	0	-2.2	-3.4
7	2 = PA	10	0	-1.5	-2.5
8	2 = PA	10	0	-1.7	-3.4
9	2 = PA	10	0	-1.7	-4
10	2 = PA	10	0	-1.3	-3.7
Table Analyzed	Fig 4K
Column D	PA 4h
vs.	vs.
Column C	Veh 4h
Mann Whitney test
P value	0.0179
Exact or approximate P value?	Exact
P value summary	*
Significantly different (P < 0.05)?	Yes
One- or two-tailed P value?	Two-tailed
Sum of ranks in column C,D	21 , 15
Mann-Whitney U	0
Table Analyzed	Fig 4K
Column F	PA 6h
vs.	vs.
Column E	Veh 6h
Mann Whitney test
P value	0.0357
Exact or approximate P value?	Exact
P value summary	*
Significantly different (P < 0.05)?	Yes
One- or two-tailed P value?	Two-tailed
Sum of ranks in column E,F	21 , 15
Mann-Whitney U	0
Table Analyzed	Fig 4K
Column H	PA 8h
vs.	vs.
Column G	Veh 8h
Mann Whitney test
P value	0.0179
Exact or approximate P value?	Exact
P value summary	*
Significantly different (P < 0.05)?	Yes
One- or two-tailed P value?	Two-tailed
Sum of ranks in column G,H	21 , 15
Mann-Whitney U	0
Table Analyzed	Fig 4K
Column J	PA 10h
vs.	vs.
Column I	Veh 10h
Mann Whitney test
P value	0.0357
Exact or approximate P value?	Exact
P value summary	*
Significantly different (P < 0.05)?	Yes
One- or two-tailed P value?	Two-tailed
Sum of ranks in column I,J	21 , 15
Mann-Whitney U	0
Table Analyzed	Fig 4K
Column L	PA 12h
vs.	vs.
Column K	Veh 12h
Mann Whitney test
P value	0.0357
Exact or approximate P value?	Exact
P value summary	*
Significantly different (P < 0.05)?	Yes
One- or two-tailed P value?	Two-tailed
Sum of ranks in column K,L	21 , 15
Mann-Whitney U	0

## Sheet: Fig 4G 6 - 10h
M#	Cage#	LPS (mg/kg)	Weight (g) 6h	Temp (℃) 6h	Weight (g) 8h	Temp (℃) 8h	Weight (g) 10h	Temp (℃) 10h	Weight (g) 0h	Temp (℃) 0h
1	1 = Veh	10	24.03	33.7	23.68	30.9	23.63	29.4	24.65	36.1
2	1 = Veh	10	22.54	no chip	22.19	no chip	22.02	no chip	23.25	no chip
3	1 = Veh	10	22.54	35.5	21.95	34.1	21.8	35.5	23.01	36.3
4	1 = Veh	10	19.88	34.7	19.4	34.1	19.38	34.3	20.52	36.3
5	1 = Veh	10	19.67	no chip	19.01	no chip	18.96	no chip	19.96	no chip
6	2 = PA	10	21.59	33.5	21.19	28.6	21.16	26.5	22.98	36.9
7	2 = PA	10	19.01	33	18.75	29.2	18.76	27.2	20.58	37
8	2 = PA	10	20.91	31.8	20.63	29.6	20.57	26.7	22.31	36.8
9	2 = PA	10	20.29	31.5	20.12	23.8	20.02	24.2	22.02	36.8
10	2 = PA	10	21.31	32.2	21.11	29	21.01	27.4	22.81	36.8
Delta Temp (℃) M#	Cage#	LPS (mg/kg)	Temp (℃) 6h	Temp (℃) 8h	Temp (℃) 10h
1	1 = Veh	10	-2.4	-5.2	-6.7
2	1 = Veh	10
3	1 = Veh	10	-0.8	-2.2	-0.8
4	1 = Veh	10	-1.6	-2.2	-2
5	1 = Veh	10
6	2 = PA	10	-3.4	-8.3	-10.4
7	2 = PA	10	-4	-7.8	-9.8
8	2 = PA	10	-5	-7.2	-10.1
9	2 = PA	10	-5.3	-13	-12.6
10	2 = PA	10	-4.6	-7.8	-9.4

## Sheet: Fig 4G 12 - 16h
M#	Cage#	LPS (mg/kg)	Weight (g) 12h	Temp (℃) 12h	Weight (g) 14h	Temp (℃) 14h	Weight (g) 16h	Temp (℃) 16h	Weight (g) 0h	Temp (℃) 0h
1	1 = Veh	10	23.53	29.1	x	x	x	x	24.65	36.1
2	1 = Veh	10	22.04	no chip	21.8	no chip	x	x	23.25	no chip
3	1 = Veh	10	21.74	35.4	21.66	34.9	21.61	34.1	23.01	36.3
4	1 = Veh	10	19.32	34.3	19.1	35.3	19.09	34.3	20.52	36.3
5	1 = Veh	10	18.88	no chip	18.71	no chip	18.74	no chip	19.96	no chip
6	2 = PA	10	21.18	26.6	20.96	25.9	20.95	25.7	22.98	36.9
7	2 = PA	10	18.71	27.4	18.54	27.9	18.54	26.9	20.58	37
8	2 = PA	10	20.52	26.3	20.41	25.9	20.41	25.2	22.31	36.8
9	2 = PA	10	19.99	24.5	19.84	26.9	19.84	26.4	22.02	36.8
10	2 = PA	10	20.98	27.4	20.84	27.3	20.82	26.4	22.81	36.8
Delta Temp (℃) M#	Cage#	LPS (mg/kg)	Temp (℃) 12h	Temp (℃) 14h	Temp (℃) 16h
1	1 = Veh	10	-7
2	1 = Veh	10
3	1 = Veh	10	-0.9	-1.4	-2.2
4	1 = Veh	10	-2	-1	-2
5	1 = Veh	10
6	2 = PA	10	-10.3	-11	-11.2
7	2 = PA	10	-9.6	-9.1	-10.1
8	2 = PA	10	-10.5	-10.9	-11.6
9	2 = PA	10	-12.3	-9.9	-10.4
10	2 = PA	10	-9.4	-9.5	-10.4

## Sheet: Fig 4G 18 - 22h
M#	Cage#	LPS (mg/kg)	Weight (g) 18h	Temp (℃) 18h	Weight (g) 20h	Temp (℃) 20h	Weight (g) 22h	Temp (℃) 22h	Weight (g) 0h	Temp (℃) 0h
1	1 = Veh	10	x	x	x	x	x	x	24.65	36.1
2	1 = Veh	10	x	x	x	x	x	x	23.25	no chip
3	1 = Veh	10	21.48	35.7	21.36	35.9	21.15	35.1	23.01	36.3
4	1 = Veh	10	18.97	34.9	18.96	35.4	18.93	35.7	20.52	36.3
5	1 = Veh	10	18.61	no chip	18.47	no chip	18.43	no chip	19.96	no chip
6	2 = PA	10	20.87	23.8	x	x	x	x	22.98	36.9
7	2 = PA	10	18.49	27.9	x	x	x	x	20.58	37
8	2 = PA	10	20.42	24.6	20.27	22.6	x	x	22.31	36.8
9	2 = PA	10	19.79	25.7	19.7	24.1	19.63	23	22.02	36.8
10	2 = PA	10	20.76	26.4	20.7	24.8	x	x	22.81	36.8
Delta Temp (℃) M#	Cage#	LPS (mg/kg)	Temp (℃) 18h	Temp (℃) 20h	Temp (℃) 22h
1	1 = Veh	10
2	1 = Veh	10
3	1 = Veh	10	-0.6	-0.4	-1.2
4	1 = Veh	10	-1.4	-0.9	-0.6
5	1 = Veh	10
6	2 = PA	10	-13.1
7	2 = PA	10	-9.1
8	2 = PA	10	-12.2	-14.2
9	2 = PA	10	-11.1	-12.7	-13.8
10	2 = PA	10	-10.4	-12

[truncated: 3 more sheets: Fig 4G 24 - 30h, Fig 4H, Fig 4I + STATS]
