# Supplementary material for: Enriched dietary saturated fatty acids induce trained immunity via ceramide production that enhances severity of endotoxemia and clearance of infection
Source: eLife. 2022 Oct 20;11:e76744. doi: 10.7554/eLife.76744 (PMC9642993; doi:10.7554/eLife.76744)
Supplement: Figure 5—source data 1. [file elife-76744-fig5-data1.xlsx]

## Sheet: Fig 3K, 5A(1) + STATS
Note for Reviewers: Naïve, LPS, PA + LPS and EtOH triplicates were run alongside FB1 triplicates for Fig 3K-M, and OA triplicates show in in Fig 5A-C.
Software Version	3.10.06
Experiment File Path:
Protocol File Path:
Plate Number	Plate 1	TNF	54 samples
Date	2021-12-05
Time	00:58:38
Reader Type:	Synergy HTX
Reader Serial Number:	2009032
Reading Type	Reader
Procedure Details
Plate Type	96 WELL PLATE (Use plate lid)
Eject plate on completion
Read	Absorbance Endpoint
	Full Plate
	Wavelengths: 450
	Read Speed: Normal, Delay: 100 msec, Measurements/Data Point: 8
Layout
		1	2	3	4	5	6	7	8	9	10	11	12
	A	STD1	STD1	SPL1	SPL9	SPL17	SPL25	SPL33	SPL41	SPL49				Well ID
		2000	2000											Conc/Dil
	B	STD2	STD2	SPL2	SPL10	SPL18	SPL26	SPL34	SPL42	SPL50				Well ID
		1000	1000											Conc/Dil
	C	STD3	STD3	SPL3	SPL11	SPL19	SPL27	SPL35	SPL43	SPL51				Well ID
		500	500											Conc/Dil
	D	STD4	STD4	SPL4	SPL12	SPL20	SPL28	SPL36	SPL44	SPL52				Well ID
		250	250											Conc/Dil
	E	STD5	STD5	SPL5	SPL13	SPL21	SPL29	SPL37	SPL45	SPL53				Well ID
		125	125											Conc/Dil
	F	STD6	STD6	SPL6	SPL14	SPL22	SPL30	SPL38	SPL46	SPL54				Well ID
		62.5	62.5											Conc/Dil
	G	STD7	STD7	SPL7	SPL15	SPL23	SPL31	SPL39	SPL47	SPL55				Well ID
		31.3	31.3											Conc/Dil
	H	BLK	BLK	SPL8	SPL16	SPL24	SPL32	SPL40	SPL48	SPL56				Well ID
														Conc/Dil
Results
Actual Temperature:	21.3
		1	2	3	4	5	6	7	8	9	10	11	12				Blanked 450
	A	1.673	1.754	0.324	0.097	0.522	0.091	0.284	0.091	0.281				450				1	2	3	4	5	6	7	8	9	10
		1.593	1.675	0.244	0.018	0.442	0.012	0.205	0.012	0.201				Blank 450			A	1.593	1.675	0.244	0.018	0.442	0.012	0.205	0.012	0.201
	B	1.419	1.413	0.35	0.088	0.509	0.091	0.078	0.088	0.29				450			B	1.34	1.334	0.271	0.008	0.43	0.011	-0.001	0.009	0.21
		1.34	1.334	0.271	0.008	0.43	0.011	-0.001	0.009	0.21				Blank 450			C	0.831	0.81	0.233	0.009	0.294	0.028	0.019	0.358	0.193
	C	0.91	0.889	0.312	0.088	0.374	0.108	0.098	0.437	0.272				450			D	0.444	0.528	0.236	0.006	0.163	0.005	0.014	0.259	0.012
		0.831	0.81	0.233	0.009	0.294	0.028	0.019	0.358	0.193				Blank 450			E	0.276	0.267	0.205	0.007	0.284	0.004	0.167	0.239	0.002
	D	0.524	0.607	0.315	0.085	0.242	0.084	0.093	0.339	0.092				450			F	0.156	0.163	0.218	0	0.31	0.004	0.163	0.009	-0.003
		0.444	0.528	0.236	0.006	0.163	0.005	0.014	0.259	0.012				Blank 450			G	0.09	0.091	0.006	0.003	0.26	0.137	0.139	0.041
	E	0.355	0.347	0.284	0.087	0.363	0.083	0.247	0.319	0.082				450			H	-0.002	0.002	0.006	0.36	0.182	0.133	0.006	0.01
		0.276	0.267	0.205	0.007	0.284	0.004	0.167	0.239	0.002				Blank 450
	F	0.235	0.242	0.297	0.079	0.39	0.083	0.242	0.089	0.076				450
		0.156	0.163	0.218	0	0.31	0.004	0.163	0.009	-0.003				Blank 450			Average Absorbance
	G	0.169	0.171	0.085	0.083	0.339	0.217	0.219	0.121	0.089				450			Standards			FB plate		FB plate		FB plate
		0.09	0.091	0.006	0.003	0.26	0.137	0.139	0.041	0.009				Blank 450			2000	1.634		FB L	0.244	PA	0.006	PA FB	0.007
	H	0.078	0.081	0.085	0.44	0.262	0.213	0.085	0.089	0.072				450			1000	1.337		FB L	0.271	PA	0.006	PA FB	0
		-0.002	0.002	0.006	0.36	0.182	0.133	0.006	0.01	-0.007				Blank 450			500	0.8205		FB L	0.233	PA	0.018	PA FB	0.003
																	250	0.486		L	0.236	FB	0.008	PA L	0.36
																	125	0.2715		L	0.205	FB	0.009	PA L	0.442
																	62.5	0.1595		L	0.218	FB	0.006	PA L	0.43
																	31.3	0.0905
																				FB plate		FB/OA plates		OA plate
Table Analyzed	FIG 5A																			PA FB L	0.294	N (for FB)	0.012	L	0.137
																				PA FB L	0.163	N (for FB)	0.011	L	0.133
Column B	LPS-24h																			PA FB L	0.284	N (for FB)	0.028	L	0.205
vs.	vs.																			E (0.97%)	0.31	N (for OA)	0.005	OA	-0.001
Column A	Naive																			E (0.97%)	0.26	N (for OA)	0.004	OA	0.019
																				E (0.97%)	0.182	N (for OA)	0.004	OA	0.014
Unpaired t test
P value	0.001																			OA plate
P value summary	***																			OA L	0.167	PA L	0.358	OA PA L	0.201
Significantly different (P < 0.05)?	Yes																			OA L	0.163	PA L	0.259	OA PA L	0.21
One- or two-tailed P value?	Two-tailed																			OA L	0.139	PA L	0.239	OA PA L	0.193
t, df	t=4.614, df=10																			PA	0.006	OA PA	0.009	E (0.83%)	0.012
																				PA	0.012	OA PA	0.041	E (0.83%)	0.002
Table Analyzed	FIG 5A																			PA	0.009	OA PA	0.01	E (0.83%)	-0.003
Column H	PA-12h → LPS-24h																	Note: EtOH% for PA + FB = 0.97%; EtOH% for PA only = 0.83%
vs.	vs.
Column B	LPS-24h
Unpaired t test
P value	0.0007
P value summary	***
Significantly different (P < 0.05)?	Yes
One- or two-tailed P value?	Two-tailed
t, df	t=4.832, df=10
Table Analyzed	Fig 5A
Column I	PA/OA-12h → LPS-24h
vs.	vs.
Column H	PA-12h → LPS-24h
Unpaired t test
P value	0.0071
P value summary	**
Significantly different (P < 0.05)?	Yes
One- or two-tailed P value?	Two-tailed
t, df	t=3.375, df=10
Table Analyzed	Fig 5A
Column I	PA/OA-12h → LPS-24h
vs.	vs.
Column B	LPS-24h
Unpaired t test
P value	0.0052
P value summary	**
Significantly different (P < 0.05)?	Yes
One- or two-tailed P value?	Two-tailed
t, df	t=3.557, df=10

## Sheet: Fig 5A (2)
Software Version	3.10.06
Experiment File Path:	C:\Users\hickman6\Desktop\Synergy HTX Data\9.14.21 Oleic PA Experiment\9.14.21 TNF Oleic PA Experiment.xpt
Protocol File Path:	C:\Users\Public\Documents\Protocols\TNF ELISA Protocol.prt
Plate Number	Plate 1
Date	2021-10-28
Time	15:55:05
Reader Type:	Synergy HTX
Reader Serial Number:	2009032
Reading Type	Reader
Procedure Details
Plate Type	96 WELL PLATE (Use plate lid)
Eject plate on completion
Read	Absorbance Endpoint
	Full Plate
	Wavelengths: 450, 620
	Read Speed: Normal, Delay: 100 msec, Measurements/Data Point: 8
Layout
		1	2	3	4	5	6	7	8	9	10	11	12
	A	STDB1	STDB1	SPL1	SPL7	SPL13								Well ID				1	2	3	4	5				9	10
		2000	2000											Conc/Dil			A	2000	2000	Naive	Oleic	PA
	B	STD1	STD1	SPL2	SPL8	SPL14								Well ID			B	1000	1000	Naive	Oleic	PA
		1000	1000											Conc/Dil			C	500	500	Naive	Oleic	PA
	C	STD2	STD2	SPL3	SPL9	SPL15								Well ID			D	250	250	N + LPS	O + LPS	PA + L
		500	500											Conc/Dil			E	125	125	N + LPS	O + LPS	PA + L
	D	STD3	STD3	SPL4	SPL10	SPL16								Well ID			F	62.5	62.5	N + LPS	O + LPS	PA + L
		250	250											Conc/Dil			G	31.3	31.3	PA + Oleic	PA + Oleic	PA + Oleic
	E	STD4	STD4	SPL5	SPL11	SPL17								Well ID			H	BLANK	BLANK	PO + LPS	PO + LPS	PO + LPS
		125	125											Conc/Dil
	F	STD5	STD5	SPL6	SPL12	SPL18								Well ID
		62.5	62.5											Conc/Dil
	G	STD6	STD6	SPL19	SPL20	SPL21								Well ID
		31.3	31.3											Conc/Dil
	H	BLK	BLK	SPL22	SPL23	SPL24								Well ID
														Conc/Dil
Results
Actual Temperature:	21.9
Actual Temperature:	21.9
																	Blanked 450
		1	2	3	4	5	6	7	8	9	10	11	12					1	2	3	4	5	6	7	8	9	10
	A	2.437	2.213	0.092	0.086	0.09								450			A	2.351	2.127	0.006	0.001	0.004
		0.052	0.05	0.042	0.037	0.038								620			B	1.605	1.456	0	0.001	0.006
		2.351	2.127	0.006	0.001	0.004								Blank 450			C	1.105	1.022	0.004	0.003	0.007
		0.015	0.014	0.005	0	0.002								Blank 620			D	0.68	0.635	0.217	0.234	0.698
	B	1.691	1.542	0.086	0.087	0.091								450			E	0.447	0.409	0.225	0.286	0.812
		0.046	0.046	0.037	0.037	0.038								620			F	0.291	0.263	0.316	0.342	1.014
		1.605	1.456	0	0.001	0.006								Blank 450			G	0.176	0.16	0.005	0.006	0.005
		0.01	0.01	0.001	0.001	0.002								Blank 620			H	0.001	0	0.511	0.599	0.45
	C	1.191	1.108	0.09	0.089	0.093								450
		0.043	0.043	0.037	0.037	0.037								620
		1.105	1.022	0.004	0.003	0.007								Blank 450			Average Absorbance
		0.007	0.007	0.001	0.001	0.001								Blank 620			Standards
	D	0.766	0.721	0.303	0.32	0.784								450			2000	2.239		Naive	0.006		Oleic	0.001		PA	0.004		PA + Oleic	0.005
		0.039	0.038	0.037	0.037	0.04								620			1000	1.5305		Naive	0		Oleic	0.001		PA	0.006		PA + Oleic	0.006
		0.68	0.635	0.217	0.234	0.698								Blank 450			500	1.0635		Naive	0.004		Oleic	0.003		PA	0.007		PA + Oleic	0.005
		0.003	0.002	0	0.001	0.003								Blank 620			250	0.6575		N + LPS	0.217		O + LPS	0.234		PA + L	0.698		PO + LPS	0.511
	E	0.533	0.495	0.311	0.372	0.898								450			125	0.428		N + LPS	0.225		O + LPS	0.286		PA + L	0.812		PO + LPS	0.599
		0.038	0.037	0.036	0.037	0.04								620			62.5	0.277		N + LPS	0.316		O + LPS	0.342		PA + L	1.014		PO + LPS	0.45
		0.447	0.409	0.225	0.286	0.812								Blank 450			31.3	0.168
		0.001	0.001	0	0.001	0.004								Blank 620
	F	0.377	0.349	0.402	0.428	1.1								450
		0.037	0.037	0.037	0.038	0.042								620
		0.291	0.263	0.316	0.342	1.014								Blank 450
		0.001	0.001	0.001	0.002	0.006								Blank 620
	G	0.262	0.246	0.091	0.092	0.09								450
		0.039	0.037	0.037	0.037	0.037								620
		0.176	0.16	0.005	0.006	0.005								Blank 450
		0.003	0.001	0	0	0.001								Blank 620
	H	0.086	0.086	0.597	0.685	0.536								450
		0.036	0.036	0.041	0.041	0.04								620
		0.001	0	0.511	0.599	0.45								Blank 450
		0	0	0.004	0.004	0.003								Blank 620

## Sheet: Fig 5B + STATS
Note for Reviewers: Naïve, LPS, PA + LPS and EtOH triplicates were run alongside FB1 triplicates for Fig 3K-M, and OA triplicates show in in Fig 5A-C.
Software Version	3.10.06
Experiment File Path:
Protocol File Path:
Plate Number	Plate 3	IL-6	54 samples
Date	2021-12-05
Time	01:02:42
Reader Type:	Synergy HTX
Reader Serial Number:	2009032
Reading Type	Reader
Procedure Details
Plate Type	96 WELL PLATE (Use plate lid)
Eject plate on completion
Read	Absorbance Endpoint
	Full Plate
	Wavelengths: 450
	Read Speed: Normal, Delay: 100 msec, Measurements/Data Point: 8
Layout
		1	2	3	4	5	6	7	8	9	10	11	12
	A	STD1	STD1	SPL1	SPL9	SPL17	SPL25	SPL33	SPL41	SPL49				Well ID
		2000	2000											Conc/Dil
	B	STD2	STD2	SPL2	SPL10	SPL18	SPL26	SPL34	SPL42	SPL50				Well ID
		1000	1000											Conc/Dil
	C	STD3	STD3	SPL3	SPL11	SPL19	SPL27	SPL35	SPL43	SPL51				Well ID
		500	500											Conc/Dil
	D	STD4	STD4	SPL4	SPL12	SPL20	SPL28	SPL36	SPL44	SPL52				Well ID
		250	250											Conc/Dil
	E	STD5	STD5	SPL5	SPL13	SPL21	SPL29	SPL37	SPL45	SPL53				Well ID
		125	125											Conc/Dil
	F	STD6	STD6	SPL6	SPL14	SPL22	SPL30	SPL38	SPL46	SPL54				Well ID
		62.5	62.5											Conc/Dil
	G	STD7	STD7	SPL7	SPL15	SPL23	SPL31	SPL39	SPL47	SPL55				Well ID
		31.3	31.3											Conc/Dil
	H	BLK	BLK	SPL8	SPL16	SPL24	SPL32	SPL40	SPL48	SPL56				Well ID
														Conc/Dil
Results
Actual Temperature:	21.4
		1	2	3	4	5	6	7	8	9	10	11	12				Blanked 450
	A	2.655	2.859	0.516	0.059	1.041	0.063	0.441	0.057	0.42				450				1	2	3	4	5	6	7	8	9
		2.6	2.805	0.461	0.004	0.987	0.009	0.387	0.002	0.366				Blank 450			A	2.6	2.805	0.461	0.004	0.987	0.009	0.387	0.002	0.366
	B	1.464	1.417	0.433	0.054	1.046	0.06	0.059	0.058	0.417				450			B	1.41	1.362	0.379	-0.001	0.991	0.006	0.004	0.004	0.362
		1.41	1.362	0.379	-0.001	0.991	0.006	0.004	0.004	0.362				Blank 450			C	0.764	0.704	0.418	0.006	1.181	0.006	0.023	0.646	0.381
	C	0.819	0.759	0.473	0.06	1.236	0.061	0.078	0.701	0.435				450			D	0.347	0.371	0.431	0.008	0.576	0.006	0.006	0.554	0.009
		0.764	0.704	0.418	0.006	1.181	0.006	0.023	0.646	0.381				Blank 450			E	0.173	0.174	0.373	0.011	1.17	0.016	0.253	0.555	0.01
	D	0.401	0.426	0.485	0.062	0.63	0.061	0.06	0.609	0.063				450			F	0.083	0.087	0.362	0.01	0.599	0.009	0.239	0.023	0.018
		0.347	0.371	0.431	0.008	0.576	0.006	0.006	0.554	0.009				Blank 450			G	0.046	0.043	0.003	0.008	0.604	0.244	0.204	0.005
	E	0.227	0.228	0.428	0.065	1.224	0.07	0.308	0.609	0.065				450			H	0	0	-0.001	0.944	0.503	0.248	0.001	0
		0.173	0.174	0.373	0.011	1.17	0.016	0.253	0.555	0.01				Blank 450
	F	0.138	0.141	0.416	0.064	0.653	0.063	0.294	0.078	0.072				450
		0.083	0.087	0.362	0.01	0.599	0.009	0.239	0.023	0.018				Blank 450			Average Absorbance
	G	0.1	0.098	0.057	0.062	0.659	0.298	0.258	0.06	0.068				450			Standards			FB plate		FB plate		FB plate
		0.046	0.043	0.003	0.008	0.604	0.244	0.204	0.005	0.013				Blank 450			2000	2.7025		FB L	0.461	PA	0.003	PA FB	0.011
	H	0.055	0.054	0.054	0.999	0.558	0.303	0.055	0.055	0.067				450			1000	1.386		FB L	0.379	PA	-0.001	PA FB	0.01
		0	0	-0.001	0.944	0.503	0.248	0.001	0	0.012				Blank 450			500	0.734		FB L	0.418	PA	0.004	PA FB	0.008
																	250	0.359		L	0.431	FB	-0.001	PA L	0.944
Table Analyzed	FIG 5B																125	0.1735		L	0.373	FB	0.006	PA L	0.987
																	62.5	0.085		L	0.362	FB	0.008	PA L	0.991
Column B	LPS-24h																31.3	0.0445
vs.	vs.																			FB plate		FB/OA plates		OA plate
Column A	Naive																			PA FB L	1.181	N (for FB)	0.009	L	0.244
																				PA FB L	0.576	N (for FB)	0.006	L	0.248
Unpaired t test																				PA FB L	1.17	N (for FB)	0.006	L	0.387
P value	0.0046																			E (0.97%) +L	0.599	N (for OA)	0.006	OA	0.004
P value summary	**																			E (0.97%) +L	0.604	N (for OA)	0.016	OA	0.023
Significantly different (P < 0.05)?	Yes																			E (0.97%) +L	0.503	N (for OA)	0.009	OA	0.006
One- or two-tailed P value?	Two-tailed
t, df	t=5.733, df=4																			OA plate
																				OA L	0.253	PA L	0.646	OA PA L	0.366
Table Analyzed	FIG 5B																			OA L	0.239	PA L	0.554	OA PA L	0.362
																				OA L	0.204	PA L	0.555	OA PA L	0.381
Column H	PA-12h → LPS-24h																			PA	0.001	OA PA	0.023	E (0.83%)	0.009
vs.	vs.																			PA	0.002	OA PA	0.005	E (0.83%)	0.01
Column B	LPS-24h																			PA	0.004	OA PA	0	E (0.83%)	0.018
Unpaired t test
P value	0.0063
P value summary	**
Significantly different (P < 0.05)?	Yes
One- or two-tailed P value?	Two-tailed
t, df	t=5.240, df=4
Table Analyzed	FIG 5B
Column I	PA/OA-12h → LPS-24h
vs.	vs.
Column H	PA-12h → LPS-24h
Unpaired t test
P value	0.0024
P value summary	**
Significantly different (P < 0.05)?	Yes
One- or two-tailed P value?	Two-tailed
t, df	t=6.854, df=4

## Sheet: Fig 3M(1), 5C + STATS
Note for Reviewers: Naïve, LPS, PA + LPS and EtOH triplicates were run alongside FB1 triplicates for Fig 3K-M, and OA triplicates show in in Fig 5A-C.
Software Version	3.10.06
Experiment File Path:
Protocol File Path:
Plate Number	Plate 1
Date	2021-11-29	IL-1b 11.18.21 BMDM supe 200uMOA / 500uMPA
Time	19:40:05
Reader Type:	Synergy HTX
Reader Serial Number:	2009032
Reading Type	Reader
Procedure Details
Plate Type	96 WELL PLATE (Use plate lid)
Eject plate on completion
Read	Absorbance Endpoint
	Full Plate
	Wavelengths: 450
	Read Speed: Normal, Delay: 100 msec, Measurements/Data Point: 8
Layout
		1	2	3	4	5	6	7	8	9	10	11	12
	A	STD1	STD1	SPL1	SPL9	SPL17	SPL25							Well ID
		500	500											Conc/Dil
	B	STD2	STD2	SPL2	SPL10	SPL18	SPL26							Well ID
		250	250											Conc/Dil
	C	STD3	STD3	SPL3	SPL11	SPL19	SPL27							Well ID
		125	125											Conc/Dil
	D	STD4	STD4	SPL4	SPL12	SPL20								Well ID
		62.5	62.5											Conc/Dil
	E	STD5	STD5	SPL5	SPL13	SPL21								Well ID
		31.25	31.25											Conc/Dil
	F	STD6	STD6	SPL6	SPL14	SPL22								Well ID
		15.6	15.6											Conc/Dil
	G	STD7	STD7	SPL7	SPL15	SPL23								Well ID
		7.8	7.8											Conc/Dil
	H	BLK	BLK	SPL8	SPL16	SPL24								Well ID
														Conc/Dil
Results
Actual Temperature:	22.6
		1	2	3	4	5	6	7	8	9	10	11	12				Blanked 450
	A	2.208	2.28	0.154	0.14	0.466	0.148							450				1	2	3	4	5	6	7	8
		2.093	2.165	0.039	0.026	0.352	0.033							Blank 450			A	2.093	2.165	0.039	0.026	0.352	0.033
	B	1.329	1.481	0.16	0.207	0.412	0.166							450			B	1.214	1.366	0.045	0.092	0.298	0.051
		1.214	1.366	0.045	0.092	0.298	0.051							Blank 450			C	0.693	0.788	0.04	0.096	0.046	0.05
	C	0.807	0.902	0.154	0.211	0.16	0.165							450			D	0.368	0.403	0.092	0.106	0.054
		0.693	0.788	0.04	0.096	0.046	0.05							Blank 450			E	0.18	0.221	0.097	0.056	0.049
	D	0.483	0.517	0.206	0.221	0.169								450			F	0.098	0.127	0.09	0.056	0.107
		0.368	0.403	0.092	0.106	0.054								Blank 450			G	0.049	0.053	0.038	0.037	0.119
	E	0.294	0.336	0.211	0.171	0.164								450			H	-0.004	0.004	0.044	0.346	0.119
		0.18	0.221	0.097	0.056	0.049								Blank 450
	F	0.213	0.241	0.204	0.17	0.221								450
		0.098	0.127	0.09	0.056	0.107								Blank 450			Average Absorbance
	G	0.164	0.167	0.153	0.152	0.234								450			Standards
		0.049	0.053	0.038	0.037	0.119								Blank 450			500	2.129		N	0.039	OA	0.038	PA	0.056
	H	0.111	0.119	0.158	0.461	0.233								450			250	1.29		N	0.045	OA	0.044	PA	0.056
		-0.004	0.004	0.044	0.346	0.119								Blank 450			125	0.7405		N	0.04	OA	0.026	PA	0.037
																	62.5	0.3855		L	0.092	OA L	0.092	PA L	0.346
Table Analyzed	FIG 3M																31.25	0.2005		L	0.097	OA L	0.096	PA L	0.352
																	15.625	0.1125		L	0.09	OA L	0.106	PA L	0.298
Column B	LPS-24h																7.813	0.051
vs.	vs.
Column A	Naive																			OA PA	0.046
																				OA PA	0.054
Unpaired t test																				OA PA	0.049
P value	0.0051																			OA PA L	0.107
P value summary	**																			OA PA L	0.119
Significantly different (P < 0.05)?	Yes																			OA PA L	0.119
One- or two-tailed P value?	Two-tailed
t, df	t=5.578, df=4
																				E (PA)	0.033
Table Analyzed	FIG 3M																			E (PA)	0.051
																				E (PA)	0.05
Column H	PA-12h → LPS-24h
vs.	vs.
Column B	LPS-24h
Unpaired t test
P value	<0.0001
P value summary	****
Significantly different (P < 0.05)?	Yes
One- or two-tailed P value?	Two-tailed
t, df	t=20.92, df=4
Table Analyzed	FIG 3M
Column I	PA/FB1-12h → LPS-24h
vs.	vs.
Column B	LPS-24h
Unpaired t test
P value	<0.0001
P value summary	****
Significantly different (P < 0.05)?	Yes
One- or two-tailed P value?	Two-tailed
t, df	t=36.81, df=4
Table Analyzed	FIG 3M
Column I	PA/FB1-12h → LPS-24h
vs.	vs.
Column H	PA-12h → LPS-24h
Unpaired t test
P value	0.0046
P value summary	**
Significantly different (P < 0.05)?	Yes
One- or two-tailed P value?	Two-tailed
t, df	t=5.722, df=4
Table Analyzed	FIG 5C
Column C	24h-LPS
vs.	vs.
Column A	Naive
Unpaired t test
P value	<0.0001
P value summary	****
Significantly different (P < 0.05)?	Yes
One- or two-tailed P value?	Two-tailed
t, df	t=18.46, df=4
Table Analyzed	FIG 5C
Column G	12h-PA + 24h-LPS
vs.	vs.
Column C	24h-LPS
Unpaired t test
P value	0.0002
P value summary	***
Significantly different (P < 0.05)?	Yes
One- or two-tailed P value?	Two-tailed
t, df	t=13.41, df=4
Table Analyzed	FIG 5C
Column I	12h-OA/PA + 24h-LPS
vs.	vs.
Column G	12h-PA + 24h-LPS
Unpaired t test
P value	0.0003
P value summary	***
Significantly different (P < 0.05)?	Yes
One- or two-tailed P value?	Two-tailed
t, df	t=12.00, df=4
Table Analyzed	FIG 5C
Column I	12h-OA/PA + 24h-LPS
vs.	vs.
Column C	24h-LPS
Unpaired t test
P value	0.0082
P value summary	**
Significantly different (P < 0.05)?	Yes
One- or two-tailed P value?	Two-tailed
t, df	t=4.879, df=4

## Sheet: Fig 5D 0-6h
M#	Diet	Weight (g) 0h	Temp (℃) 0h	Weight (g) 2h	Temp (℃) 2h	Weight (g) 4h	Temp (℃) 4h	Weight (g) 6h	Temp (℃) 6h
1	SC 300mM OA	20.61	35.8	20.26	34.6	20.19	32.3	20.13	31.2
2	SC 300mM OA	22.95	36.1	22.34	33.8	22.08	35	21.81	36.3
3	SC 300mM OA	23.15	36	22.64	34.8	21.9	34.7	21.85	34.8
4	SC 300mM OA	21.64	35.7	20.61	34.7	20.4	34.2	20.21	33.5
5	SC 300mM OA	21.37	36.3	20.82	35.1	20.55	34.6	19.94	34.1
6	SC	20.77	35.7	20.19	34.9	19.51	34.6	19.41	27.4
7	SC	25.12	36	24.55	34.4	24.15	33.6	24.02	33.2
8	SC	22.75	36.2	22.19	34.4	21.95	34.4	21.45	34.7
9	SC	20.46	36.2	19.63	34.1	19.26	34.5	18.97	32.5
10	SC	21.27	36.3	20.61	34.6	20.37	34.8	19.84	36
31	KD / 300mM OA	23.8	36.3	23.28	33.7	22.86	33.3	22.58	33.9
32	KD / 300mM OA	22.72	36.1	22.4	34.2	21.68	32.9	21.44	33.2
33	KD / 300mM OA	24.79	35.5	24.35	34.6	24.1	33.3	24.04	33.7
34	KD / 300mM OA	24.42	36.4	23.7	33.9	23.31	35.8	22.83	35.3
35	KD / 300mM OA	23.81	36.4	23.28	35	23.07	33.8	22	35
36	KD	16.51	36.4	15.36	33.5	14.97	29.6	14.71	26.5
37	KD	20.26	36.6	19.32	35.1	19.07	35.6	18.75	33.3
38	KD	22.89	36.8	21.93	34.8	21.32	34.1	21.09	31.4
39	KD	22.78	36.5	22.2	33.8	21.93	32.4	21.54	32.7
40	KD	22.71	36.1	22.08	35.1	21.75	34.4	21.24	34.8
Delta Temp (C) M#	Diet	Temp (℃) 2h	Temp (℃) 4h	Temp (℃) 6h
1	SC 300mM OA	-1.2	-3.5	-4.6
2	SC 300mM OA	-2.3	-1.1	0.2
3	SC 300mM OA	-1.2	-1.3	-1.2
4	SC 300mM OA	-1	-1.5	-2.2
5	SC 300mM OA	-1.2	-1.7	-2.2
6	SC	-0.8	-1.1	-8.3
7	SC	-1.6	-2.4	-2.8
8	SC	-1.8	-1.8	-1.5
9	SC	-2.1	-1.7	-3.7
10	SC	-1.7	-1.5	-0.3
31	KD / 300mM OA	-2.6	-3	-2.4
32	KD / 300mM OA	-1.9	-3.2	-2.9
33	KD / 300mM OA	-0.9	-2.2	-1.8
34	KD / 300mM OA	-2.5	-0.6	-1.1
35	KD / 300mM OA	-1.4	-2.6	-1.4
36	KD	-2.9	-6.8	-9.9
37	KD	-1.5	-1	-3.3
38	KD	-2	-2.7	-5.4
39	KD	-2.7	-4.1	-3.8
40	KD	-1	-1.7	-1.3
Delta Weight (C) M#	Diet	Weight (g) 2h	Weight (g) 4h	Weight (g) 6h
1	SC 300mM OA	-0.35	-0.42	-0.48
2	SC 300mM OA	-0.61	-0.87	-1.14
3	SC 300mM OA	-0.51	-1.25	-1.3
4	SC 300mM OA	-1.03	-1.24	-1.43
5	SC 300mM OA	-0.55	-0.82	-1.43
6	SC	-0.58	-1.26	-1.36
7	SC	-0.57	-0.97	-1.1
8	SC	-0.56	-0.8	-1.3
9	SC	-0.83	-1.2	-1.49
10	SC	-0.66	-0.9	-1.43
31	KD / 300mM OA	-0.52	-0.94	-1.22
32	KD / 300mM OA	-0.32	-1.04	-1.28
33	KD / 300mM OA	-0.44	-0.69	-0.75
34	KD / 300mM OA	-0.72	-1.11	-1.59
35	KD / 300mM OA	-0.53	-0.74	-1.81
36	KD	-1.15	-1.54	-1.8
37	KD	-0.94	-1.19	-1.51
38	KD	-0.96	-1.57	-1.8
39	KD	-0.58	-0.85	-1.24
40	KD	-0.63	-0.96	-1.47

## Sheet: Fig 5D 6-14h
M#	Diet	Weight (g) 0h	Temp (℃) 0h	Weight (g) 8h	Temp (℃) 8h	Weight (g) 10h	Temp (℃) 10h	Weight (g) 12h	Temp (℃) 12h	Weight (g) 14h	Temp (℃) 14h
1	SC 300mM OA	20.61	35.8	20.02	30					19.35	30.3
2	SC 300mM OA	22.95	36.1	21.47	35.7					21.09	34.9
3	SC 300mM OA	23.15	36	21.49	35.8					21.12	34.7
4	SC 300mM OA	21.64	35.7	19.94	33.4					19.54	34.5
5	SC 300mM OA	21.37	36.3	20.03	35.5					19.61	33.9
6	SC	20.77	35.7	19.22	32.9					18.93	34
7	SC	25.12	36	23.73	34					23.4	33.4
8	SC	22.75	36.2	21.39	35.9					21.02	31.8
9	SC	20.46	36.2	18.92	33.5					18.58	33.4
10	SC	21.27	36.3	19.85	36.5					19.43	35.3
31	KD / 300mM OA	23.8	36.3	22.51	34.5					21.9	33.7
32	KD / 300mM OA	22.72	36.1	21.34	34.3					20.88	31.6
33	KD / 300mM OA	24.79	35.5	23.63	34.5					22.98	32.1
34	KD / 300mM OA	24.42	36.4	22.86	35.5					22.14	32.1
35	KD / 300mM OA	23.81	36.4	22.91	35.2					22.27	35.3
36	KD	16.51	36.4	14.71	23.4					x	x
37	KD	20.26	36.6	18.68	33.1					18.22	26
38	KD	22.89	36.8	21.02	32.5					20.55	32.1
39	KD	22.78	36.5	21.49	33					20.97	25.8
40	KD	22.71	36.1	21.13	34.2					20.74	29.6
Delta Temp (C) M#	Diet	Temp (℃) 8h	Temp (℃) 10h	Temp (℃) 12h	Temp (℃) 14h
1	SC 300mM OA	-5.8	-35.8	-35.8	-5.5
2	SC 300mM OA	-0.4	-36.1	-36.1	-1.2
3	SC 300mM OA	-0.2	-36	-36	-1.3
4	SC 300mM OA	-2.3	-35.7	-35.7	-1.2
5	SC 300mM OA	-0.8	-36.3	-36.3	-2.4
6	SC	-2.8	-35.7	-35.7	-1.7
7	SC	-2	-36	-36	-2.6
8	SC	-0.3	-36.2	-36.2	-4.4
9	SC	-2.7	-36.2	-36.2	-2.8
10	SC	0.2	-36.3	-36.3	-1
31	KD / 300mM OA	-1.8	-36.3	-36.3	-2.6
32	KD / 300mM OA	-1.8	-36.1	-36.1	-4.5
33	KD / 300mM OA	-1	-35.5	-35.5	-3.4
34	KD / 300mM OA	-0.9	-36.4	-36.4	-4.3
35	KD / 300mM OA	-1.2	-36.4	-36.4	-1.1
36	KD	-13	-36.4	-36.4
37	KD	-3.5	-36.6	-36.6	-10.6
38	KD	-4.3	-36.8	-36.8	-4.7
39	KD	-3.5	-36.5	-36.5	-10.7
40	KD	-1.9	-36.1	-36.1	-6.5
Delta Weight (C) M#	Diet	Weight (g) 8h	Weight (g) 10h	Weight (g) 12h	Weight (g) 14h
1	SC 300mM OA	-0.59	-20.61	-20.61	-1.26
2	SC 300mM OA	-1.48	-22.95	-22.95	-1.86
3	SC 300mM OA	-1.66	-23.15	-23.15	-2.03
4	SC 300mM OA	-1.7	-21.64	-21.64	-2.1
5	SC 300mM OA	-1.34	-21.37	-21.37	-1.76
6	SC	-1.55	-20.77	-20.77	-1.84
7	SC	-1.39	-25.12	-25.12	-1.72
8	SC	-1.36	-22.75	-22.75	-1.73
9	SC	-1.54	-20.46	-20.46	-1.88
10	SC	-1.42	-21.27	-21.27	-1.84
31	KD / 300mM OA	-1.29	-23.8	-23.8	-1.9
32	KD / 300mM OA	-1.38	-22.72	-22.72	-1.84
33	KD / 300mM OA	-1.16	-24.79	-24.79	-1.81
34	KD / 300mM OA	-1.56	-24.42	-24.42	-2.28
35	KD / 300mM OA	-0.9	-23.81	-23.81	-1.54
36	KD	-1.8	-16.51	-16.51
37	KD	-1.58	-20.26	-20.26	-2.04
38	KD	-1.87	-22.89	-22.89	-2.34
39	KD	-1.29	-22.78	-22.78	-1.81
40	KD	-1.58	-22.71	-22.71	-1.97

## Sheet: Fig 5D 16 - 22h
M#	Diet	Weight (g) 0h	Temp (℃) 0h	Weight (g) 16h	Temp (℃) 16h	Weight (g) 18h	Temp (℃) 18h	Weight (g) 20h	Temp (℃) 20h	Weight (g) 22h	Temp (℃) 22h
1	SC 300mM OA	20.61	35.8	19.15	30.5	19.14	30.3	18.59	30.7	18.4	29.5
2	SC 300mM OA	22.95	36.1	21.06	35.7	20.99	35.7	20.83	36.4	20.56	36.9
3	SC 300mM OA	23.15	36	21.01	36	21	36.2	20.8	36.1	20.41	36.2
4	SC 300mM OA	21.64	35.7	19.49	35.2	19.46	35	19.34	35.4	19.07	35.3
5	SC 300mM OA	21.37	36.3	19.59	34.7	19.52	34.6	19.36	35.6	19.23	37.2
6	SC	20.77	35.7	18.88	34.1	18.9	34.1	18.64	35.3	18.54	36.9
7	SC	25.12	36	23.34	34.4	23.28	34.2	22.98	35.6	22.92	35.4
8	SC	22.75	36.2	20.95	31.3	20.89	31	20.72	35.6	20.59	35.8
9	SC	20.46	36.2	18.54	33.1	18.51	32.9	18.41	35.5	18.28	35
10	SC	21.27	36.3	19.42	35.8	19.38	35.6	19.44	36.9	18.81	36.4
31	KD / 300mM OA	23.8	36.3	21.71	33.5	21.71	33.9	21.49	35.6	21.32	35.5
32	KD / 300mM OA	22.72	36.1	20.7	31.7	20.78	31.6	20.51	32.3	20.43	34.3
33	KD / 300mM OA	24.79	35.5	23.07	31.5	23.02	31.4	22.73	32.4	22.63	34.1
34	KD / 300mM OA	24.42	36.4	22.14	31	22.12	31.3	21.79	34.9	21.77	33.3
35	KD / 300mM OA	23.81	36.4	22.22	34.6	22.27	34.6	22.08	35.7	21.89	35.3
36	KD	16.51	36.4	x	x	x	x	x	x	x	x
37	KD	20.26	36.6	18.11	24.9	18.09	25.3	18.1	23.4	18	20.8
38	KD	22.89	36.8	20.52	24.2	20.46	23.9	x	x	x	x
39	KD	22.78	36.5	20.87	26.2	20.8	26.4	20.85	24.2	20.94	21.1
40	KD	22.71	36.1	20.58	30	20.66	30.1	20.54	30.4	20.19	31.6
Delta Temp (C) M#	Diet	Temp (℃) 16h	Temp (℃) 18h	Temp (℃) 20h	Temp (℃) 22h
1	SC 300mM OA	-5.3	-5.5	-5.1	-6.3
2	SC 300mM OA	-0.4	-0.4	0.3	0.8
3	SC 300mM OA	0	0.2	0.1	0.2
4	SC 300mM OA	-0.5	-0.7	-0.3	-0.4
5	SC 300mM OA	-1.6	-1.7	-0.7	0.9
6	SC	-1.6	-1.6	-0.4	1.2
7	SC	-1.6	-1.8	-0.4	-0.6
8	SC	-4.9	-5.2	-0.6	-0.4
9	SC	-3.1	-3.3	-0.7	-1.2
10	SC	-0.5	-0.7	0.6	0.1
31	KD / 300mM OA	-2.8	-2.4	-0.7	-0.8
32	KD / 300mM OA	-4.4	-4.5	-3.8	-1.8
33	KD / 300mM OA	-4	-4.1	-3.1	-1.4
34	KD / 300mM OA	-5.4	-5.1	-1.5	-3.1
35	KD / 300mM OA	-1.8	-1.8	-0.7	-1.1
36	KD
37	KD	-11.7	-11.3	-13.2	-15.8
38	KD	-12.6	-12.9
39	KD	-10.3	-10.1	-12.3	-15.4
40	KD	-6.1	-6	-5.7	-4.5
Delta Weight (C) M#	Diet	Weight (g) 16h	Weight (g) 18h	Weight (g) 20h	Weight (g) 22h
1	SC 300mM OA	-1.46	-1.47	-2.02	-2.21
2	SC 300mM OA	-1.89	-1.96	-2.12	-2.39
3	SC 300mM OA	-2.14	-2.15	-2.35	-2.74
4	SC 300mM OA	-2.15	-2.18	-2.3	-2.57
5	SC 300mM OA	-1.78	-1.85	-2.01	-2.14
6	SC	-1.89	-1.87	-2.13	-2.23
7	SC	-1.78	-1.84	-2.14	-2.2
8	SC	-1.8	-1.86	-2.03	-2.16
9	SC	-1.92	-1.95	-2.05	-2.18
10	SC	-1.85	-1.89	-1.83	-2.46
31	KD / 300mM OA	-2.09	-2.09	-2.31	-2.48
32	KD / 300mM OA	-2.02	-1.94	-2.21	-2.29
33	KD / 300mM OA	-1.72	-1.77	-2.06	-2.16
34	KD / 300mM OA	-2.28	-2.3	-2.63	-2.65
35	KD / 300mM OA	-1.59	-1.54	-1.73	-1.92
36	KD
37	KD	-2.15	-2.17	-2.16	-2.26
38	KD	-2.37	-2.43
39	KD	-1.91	-1.98	-1.93	-1.84
40	KD	-2.13	-2.05	-2.17	-2.52

## Sheet: Fig 5D 24 - 30h
M#	Diet	Weight (g) 0h	Temp (℃) 0h	Weight (g) 24h	Temp (℃) 24h	Weight (g) 26h	Temp (℃) 26h	Weight (g) 28h	Temp (℃) 28h	Weight (g) 30h	Temp (℃) 30h
1	SC 300mM OA	20.61	35.8	18.25	30.2	18.01	25	x	x	x	x
2	SC 300mM OA	22.95	36.1	20.45	35.8	20.41	36	19.91	34.7	19.78	34.9
3	SC 300mM OA	23.15	36	20.31	36.6	20.2	36.4	19.52	35.3	19.5	35.4
4	SC 300mM OA	21.64	35.7	19.01	36.8	18.95	35.1	18.39	35.2	18.31	35.3
5	SC 300mM OA	21.37	36.3	18.95	36	18.82	35.8	18.37	35	18.28	34.7
6	SC	20.77	35.7	18.41	36.2	18.29	37.2	17.89	34.8	17.87	36.1
7	SC	25.12	36	22.84	35.5	22.82	35.2	22.2	34.2	22.19	33.8
8	SC	22.75	36.2	20.45	36.1	20.33	35.8	19.86	34.3	19.81	34.9
9	SC	20.46	36.2	18.13	34.6	18.01	35.5	17.58	34.6	17.58	34.5
10	SC	21.27	36.3	18.71	36.9	18.6	36.2	18.19	35.3	18.14	35.8
31	KD / 300mM OA	23.8	36.3	21.1	36	21.12	35.7	20.85	35.6	20.87	35.5
32	KD / 300mM OA	22.72	36.1	20.34	35	20.21	35.9	19.78	35.2	19.81	36
33	KD / 300mM OA	24.79	35.5	22.51	35.7	22.4	34.2	22.1	33.1	21.96	33.3
34	KD / 300mM OA	24.42	36.4	21.62	32.3	21.6	34.1	21.17	35	21.04	34.6
35	KD / 300mM OA	23.81	36.4	21.77	35.8	21.64	35.8	20.82	34.1	20.87	36
36	KD	16.51	36.4	x	x	x	x	x	x	x	x
37	KD	20.26	36.6	x	x	x	x	x	x	x	x
38	KD	22.89	36.8	x	x	x	x	x	x	x	x
39	KD	22.78	36.5	20.68	22.5	20.64	24.8	20.31	27.9	20.18	26.9
40	KD	22.71	36.1	20.07	30	19.97	31.4	19.47	32.8	19.29	33
Delta Temp (C) M#	Diet	Temp (℃) 24h	Temp (℃) 26h	Temp (℃) 28h	Temp (℃) 30h
1	SC 300mM OA	-5.6	-10.8
2	SC 300mM OA	-0.3	-0.1	-1.4	-1.2
3	SC 300mM OA	0.6	0.4	-0.7	-0.6
4	SC 300mM OA	1.1	-0.6	-0.5	-0.4
5	SC 300mM OA	-0.3	-0.5	-1.3	-1.6
6	SC	0.5	1.5	-0.9	0.4
7	SC	-0.5	-0.8	-1.8	-2.2
8	SC	-0.1	-0.4	-1.9	-1.3
9	SC	-1.6	-0.7	-1.6	-1.7
10	SC	0.6	-0.1	-1	-0.5
31	KD / 300mM OA	-0.3	-0.6	-0.7	-0.8
32	KD / 300mM OA	-1.1	-0.2	-0.9	-0.1
33	KD / 300mM OA	0.2	-1.3	-2.4	-2.2
34	KD / 300mM OA	-4.1	-2.3	-1.4	-1.8
35	KD / 300mM OA	-0.6	-0.6	-2.3	-0.4
36	KD
37	KD
38	KD
39	KD	-14	-11.7	-8.6	-9.6
40	KD	-6.1	-4.7	-3.3	-3.1
Delta Weight (C) M#	Diet	Weight (g) 24h	Weight (g) 26h	Weight (g) 28h	Weight (g) 30h
1	SC 300mM OA	-2.36	-2.6
2	SC 300mM OA	-2.5	-2.54	-3.04	-3.17
3	SC 300mM OA	-2.84	-2.95	-3.63	-3.65
4	SC 300mM OA	-2.63	-2.69	-3.25	-3.33
5	SC 300mM OA	-2.42	-2.55	-3	-3.09
6	SC	-2.36	-2.48	-2.88	-2.9
7	SC	-2.28	-2.3	-2.92	-2.93
8	SC	-2.3	-2.42	-2.89	-2.94
9	SC	-2.33	-2.45	-2.88	-2.88
10	SC	-2.56	-2.67	-3.08	-3.13
31	KD / 300mM OA	-2.7	-2.68	-2.95	-2.93
32	KD / 300mM OA	-2.38	-2.51	-2.94	-2.91
33	KD / 300mM OA	-2.28	-2.39	-2.69	-2.83
34	KD / 300mM OA	-2.8	-2.82	-3.25	-3.38
35	KD / 300mM OA	-2.04	-2.17	-2.99	-2.94
36	KD
37	KD
38	KD
39	KD	-2.1	-2.14	-2.47	-2.6
40	KD	-2.64	-2.74	-3.24	-3.42

## Sheet: Fig 5D, E + STATS
Delta temp KD			Survival KD
Table Analyzed	Fig 5D		Time (h)	KD + Veh	KD + OA	SC + veh	SC + OA
			14	1
Column H	KD + Veh 8h		22	1
vs.	vs.		24	1
Column G	KD + OA 8h		100	0
			100	0
Mann Whitney test			100		0
P value	0.0079		100		0
Exact or approximate P value?	Exact		100		0
P value summary	**		100		0
Significantly different (P < 0.05)?	Yes		100		0
One- or two-tailed P value?	Two-tailed		100			0
Sum of ranks in column G,H	40 , 15		100			0
Mann-Whitney U	0		100			0
			100			0
Table Analyzed	Fig 5D		100			0
			100				0
Column J	KD + Veh 14h		100				0
vs.	vs.		100				0
Column I	KD + OA 14h		100				0
			100				0
Mann Whitney test
P value	0.0159		Survival KD + Veh sig (7mg/kg)
Exact or approximate P value?	Exact		Comparison of Survival Curves
P value summary	*
Significantly different (P < 0.05)?	Yes		Log-rank (Mantel-Cox) test (recommended)
One- or two-tailed P value?	Two-tailed		Chi square	11.43
Sum of ranks in column I,J	35 , 10		df	3
Mann-Whitney U	0		P value	0.0096
			P value summary	**
Table Analyzed	Fig 5D		Are the survival curves sig different?	Yes
Column L	KD + Veh 16h
vs.	vs.
Column K	KD + OA 16h
Mann Whitney test
P value	0.0159
Exact or approximate P value?	Exact
P value summary	*
Significantly different (P < 0.05)?	Yes
One- or two-tailed P value?	Two-tailed
Sum of ranks in column K,L	35 , 10
Mann-Whitney U	0
Table Analyzed	Fig 5D
Column N	KD + Veh 18h
vs.	vs.
Column M	KD + OA 18h
Mann Whitney test
P value	0.0159
Exact or approximate P value?	Exact
P value summary	*
Significantly different (P < 0.05)?	Yes
One- or two-tailed P value?	Two-tailed
Sum of ranks in column M,N	35 , 10
Mann-Whitney U	0
Table Analyzed	Fig 5D
Column P	KD + Veh 20h
vs.	vs.
Column O	KD + OA 20h
Mann Whitney test
P value	0.0357
Exact or approximate P value?	Exact
P value summary	*
Significantly different (P < 0.05)?	Yes
One- or two-tailed P value?	Two-tailed
Sum of ranks in column O,P	30 , 6
Mann-Whitney U	0
Table Analyzed	Fig 5D
Column R	KD + Veh 22h
vs.	vs.
Column Q	KD + OA 22h
Mann Whitney test
P value	0.0357
Exact or approximate P value?	Exact
P value summary	*
Significantly different (P < 0.05)?	Yes
One- or two-tailed P value?	Two-tailed
Sum of ranks in column Q,R	30 , 6
Mann-Whitney U	0
Table Analyzed	Fig 5D
Column S	SC+Veh 14h
vs.	vs.
Column J	KD + Veh 14h
Mann Whitney test
P value	0.0159
Exact or approximate P value?	Exact
P value summary	*
Significantly different (P < 0.05)?	Yes
One- or two-tailed P value?	Two-tailed
Sum of ranks in column J,S	10 , 35
Mann-Whitney U	0
Table Analyzed	Fig 5D
Column T	SC+Veh 16h
vs.	vs.
Column L	KD + Veh 16h
Mann Whitney test
P value	0.0159
Exact or approximate P value?	Exact
P value summary	*
Significantly different (P < 0.05)?	Yes
One- or two-tailed P value?	Two-tailed
Sum of ranks in column L,T	10 , 35
Mann-Whitney U	0
Table Analyzed	Fig 5D
Column U	SC+Veh18h
vs.	vs.
Column N	KD + Veh 18h
Mann Whitney test
P value	0.0159
Exact or approximate P value?	Exact
P value summary	*
Significantly different (P < 0.05)?	Yes
One- or two-tailed P value?	Two-tailed
Sum of ranks in column N,U	10 , 35
Mann-Whitney U	0
Table Analyzed	Fig 5D
Column V	SC+Veh 20h
vs.	vs.
Column P	KD + Veh 20h
Mann Whitney test
P value	0.0357
Exact or approximate P value?	Exact
P value summary	*
Significantly different (P < 0.05)?	Yes
One- or two-tailed P value?	Two-tailed
Sum of ranks in column P,V	6 , 30
Mann-Whitney U	0
