# Supplementary figures and images for: Enriched dietary saturated fatty acids induce trained immunity via ceramide production that enhances severity of endotoxemia and clearance of infection
Source: eLife journal article supplement (doi:10.7554/elife.76744), 2022-10-20

**A**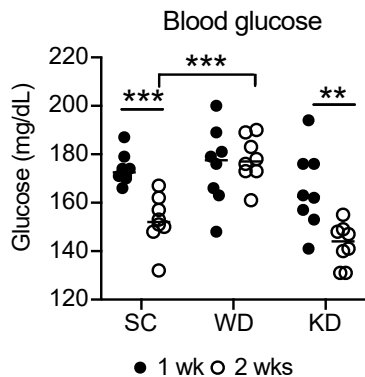**B**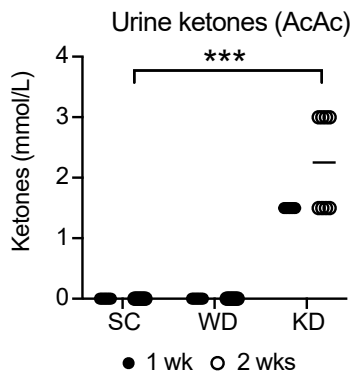**C**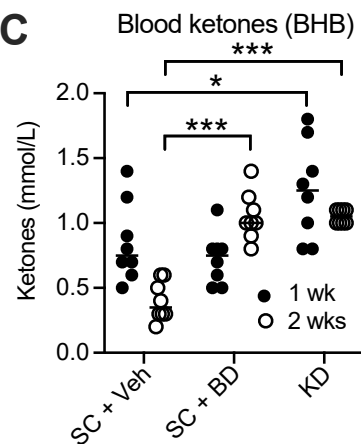**D**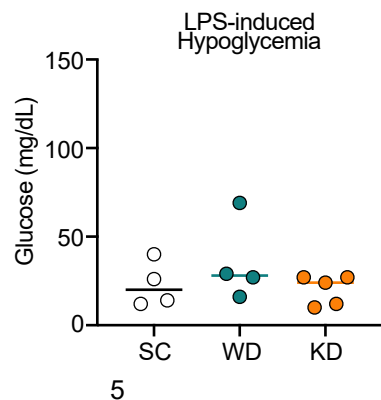**E**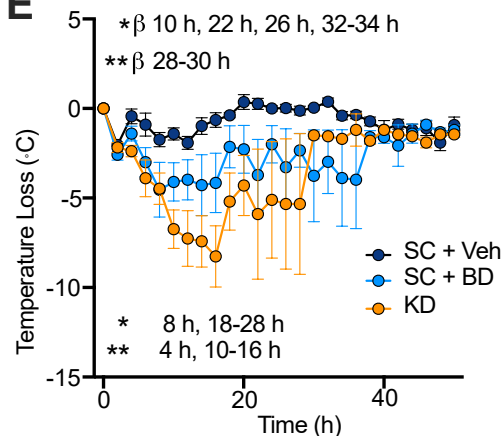**F**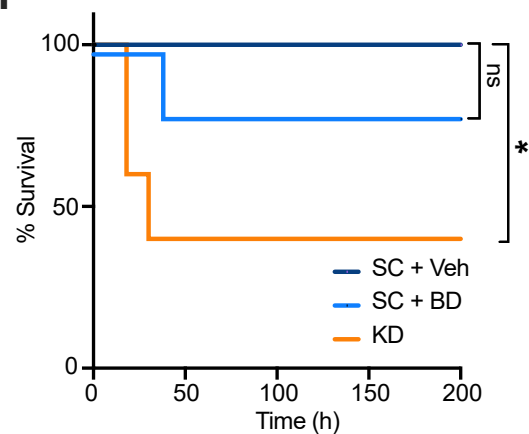**G**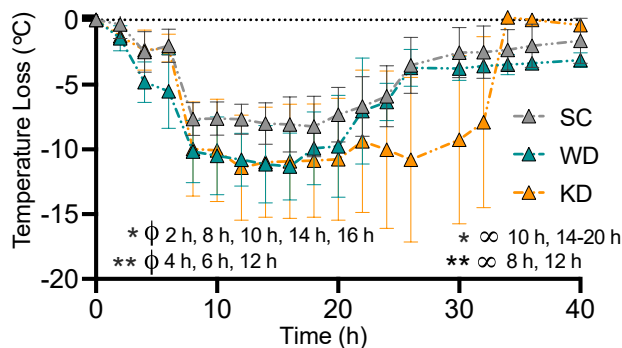**H**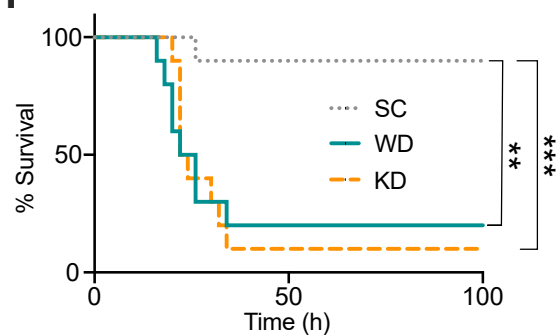

Supplement: supp [file elife_poa_e76744_Figure_1_figure_supplement_1.pdf › elife_poa_e76744_Figure_1_figure_supplement_1.pdf]

**MPP3**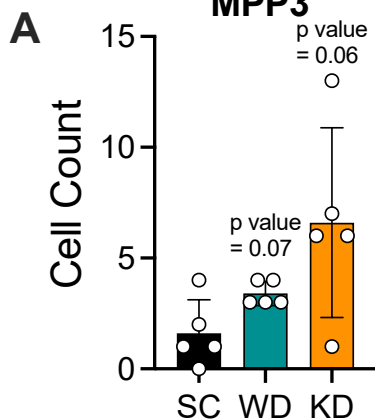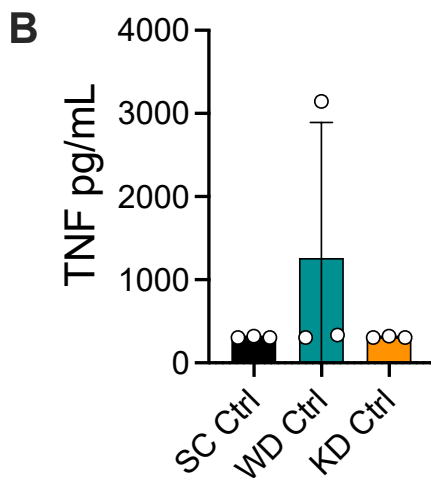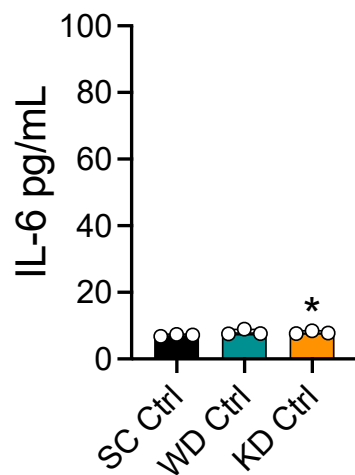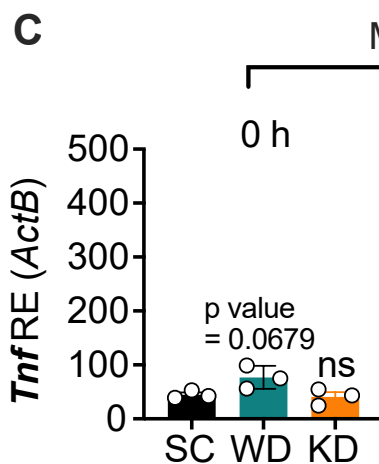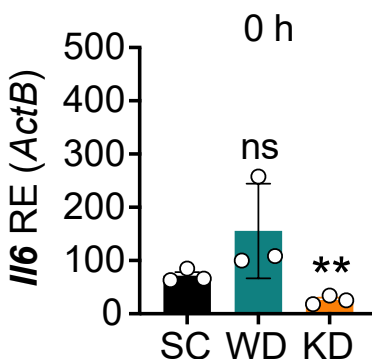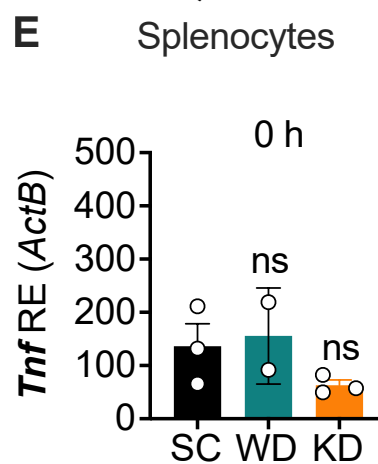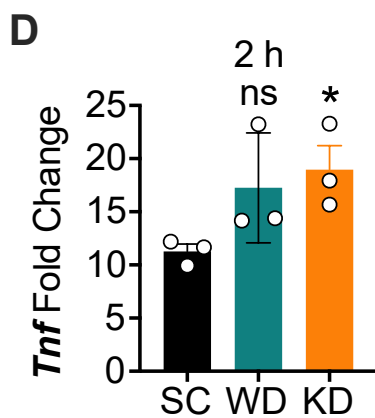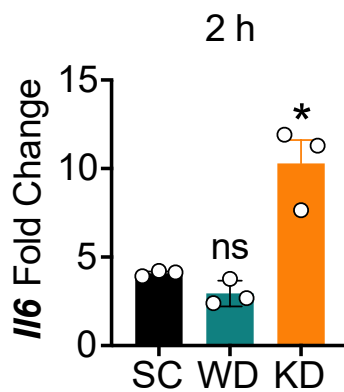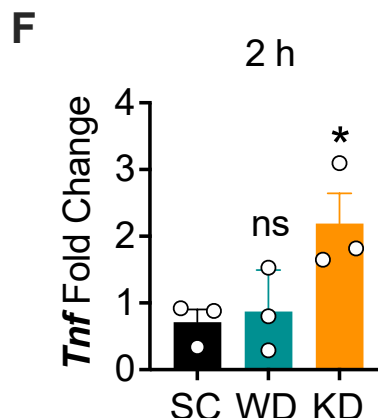

Supplement: supp [file elife_poa_e76744_Figure_2_figure_supplement_1.pdf › elife_poa_e76744_Figure_2_figure_supplement_1.pdf]

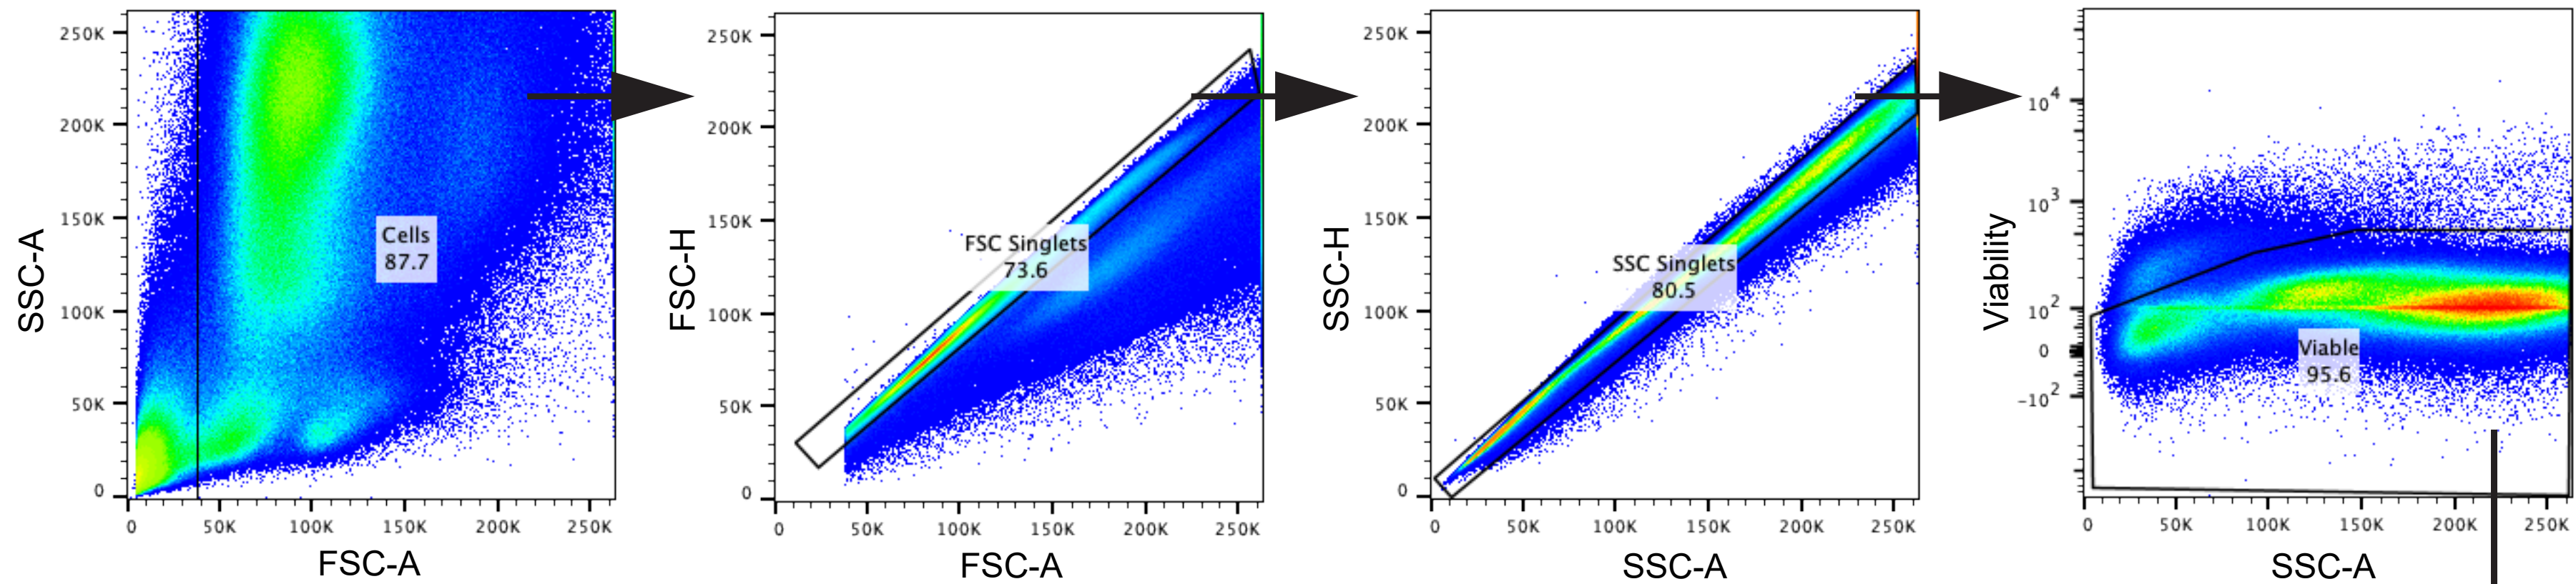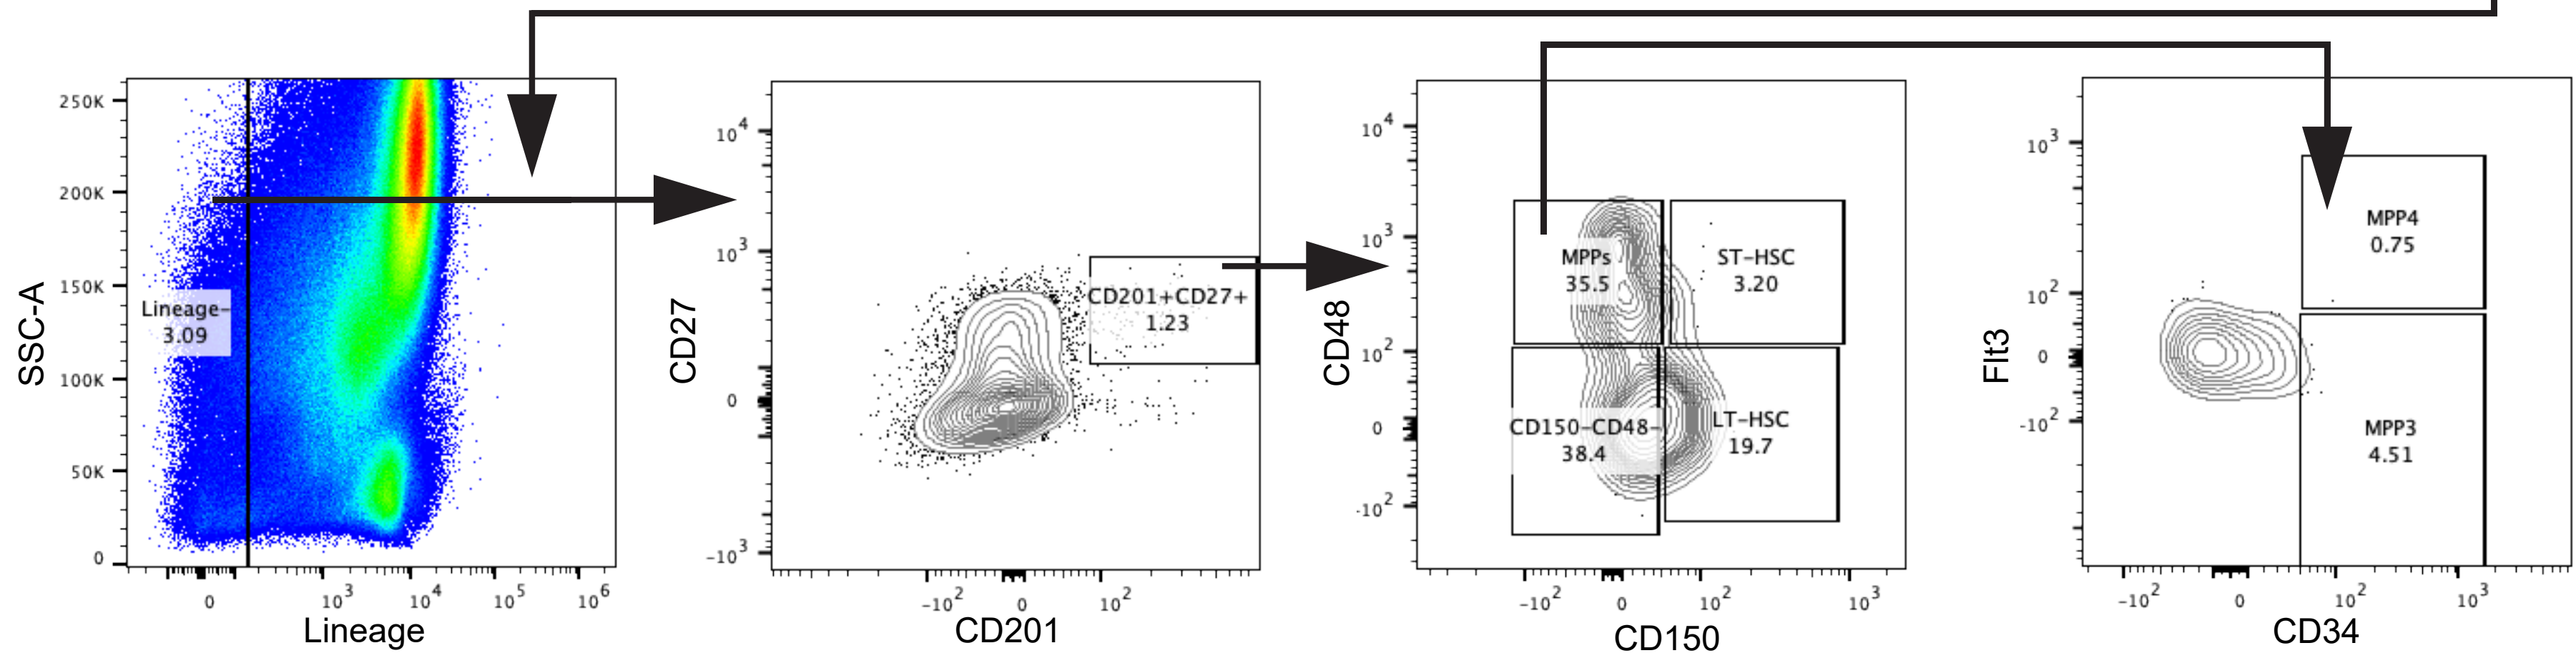

Supplement: supp [file elife_poa_e76744_Figure_2_figure_supplement_2.pdf › elife_poa_e76744_Figure_2_figure_supplement_2.pdf]

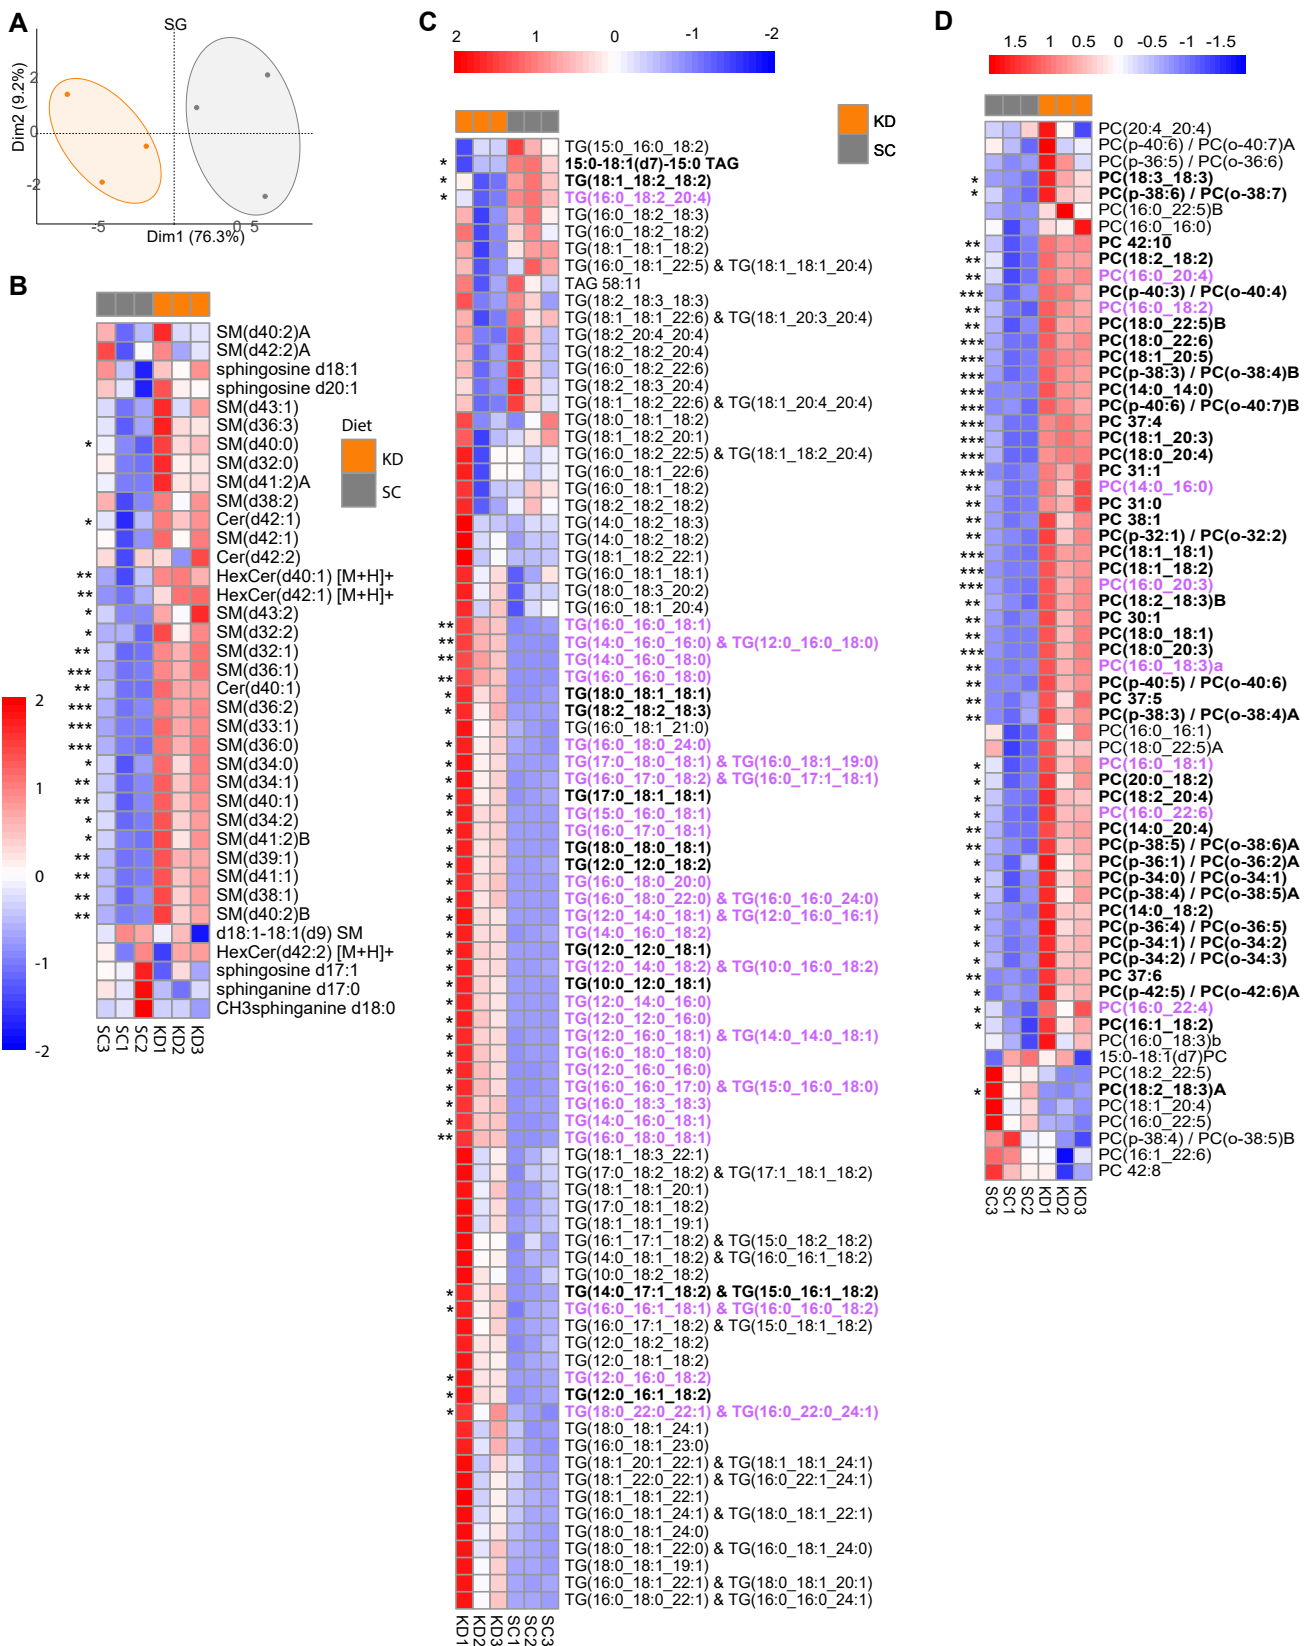

Supplement: supp [file elife_poa_e76744_Figure_3_figure_supplement_1.pdf › elife_poa_e76744_Figure_3_figure_supplement_1.pdf]

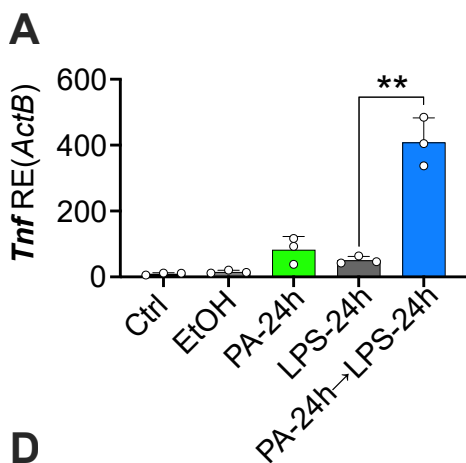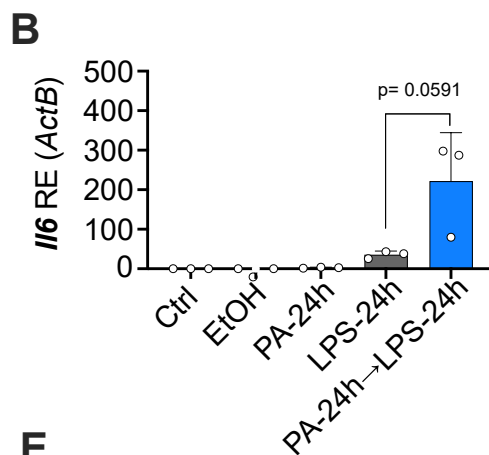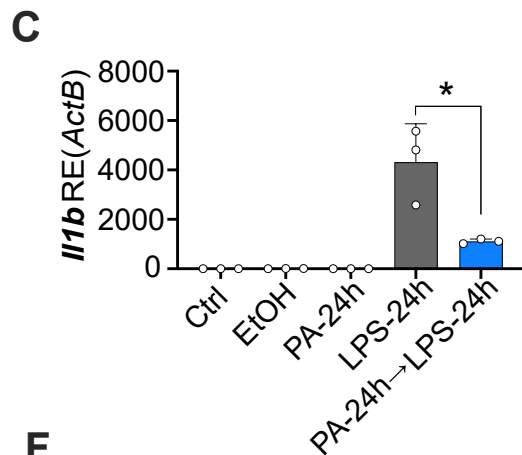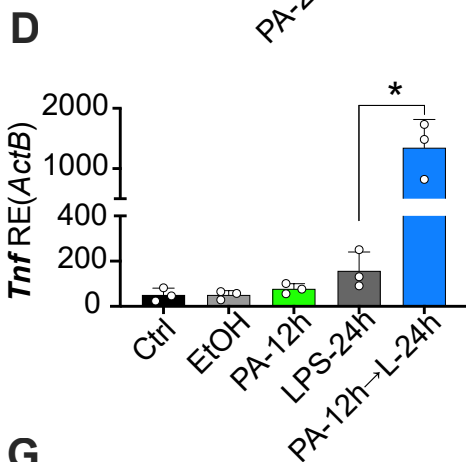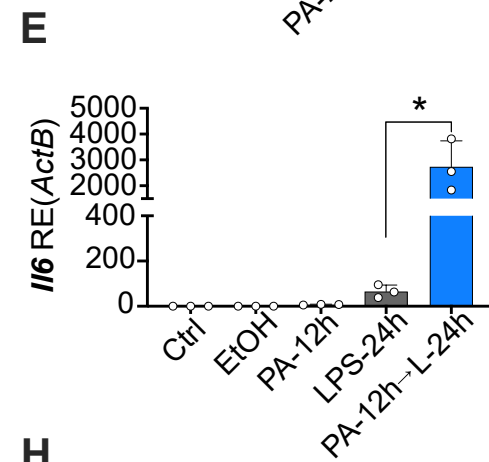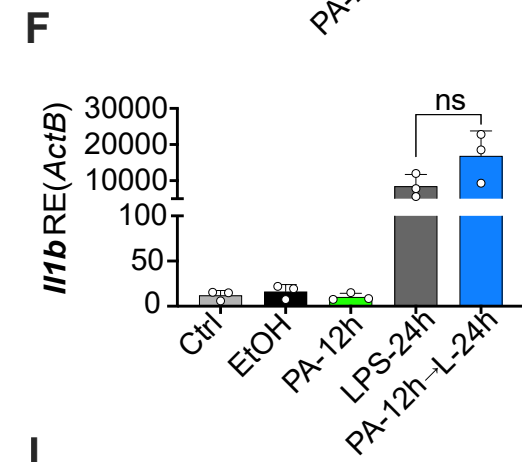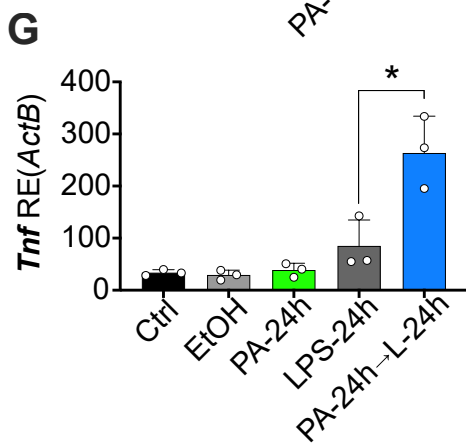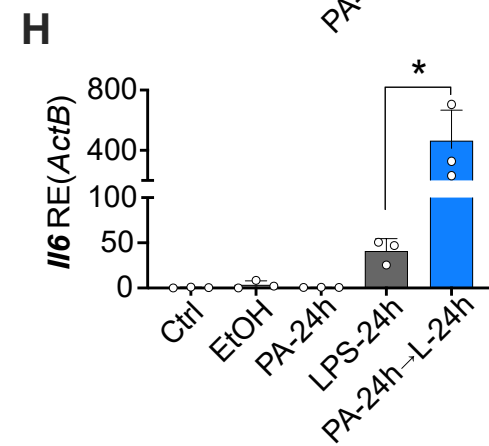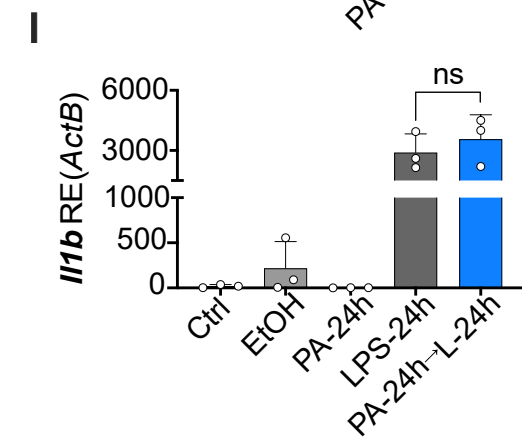

Supplement: supp [file elife_poa_e76744_Figure_3_figure_supplement_2.pdf › elife_poa_e76744_Figure_3_figure_supplement_2.pdf]

## A

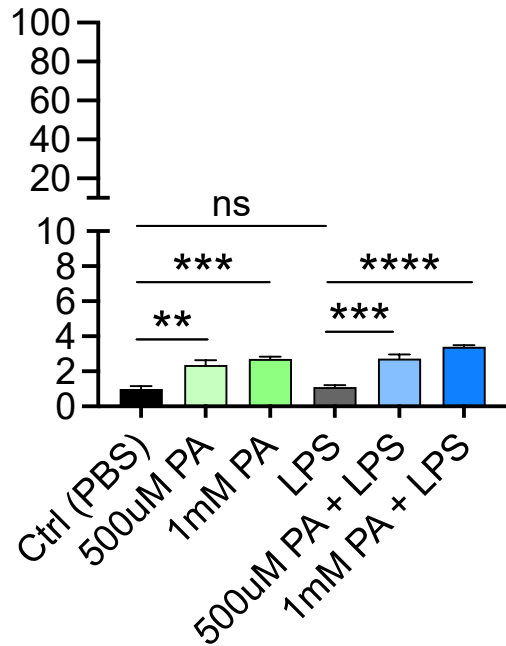

## B

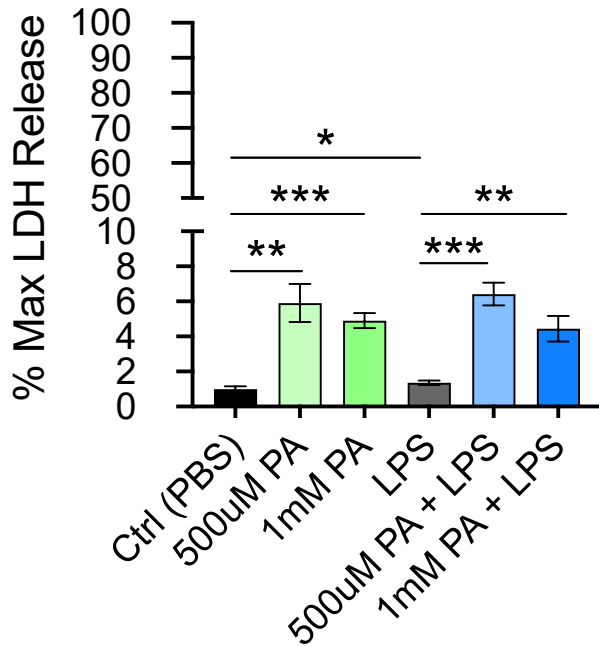

Supplement: supp [file elife_poa_e76744_Figure_3_figure_supplement_3.pdf › elife_poa_e76744_Figure_3_figure_supplement_3.pdf]

**A**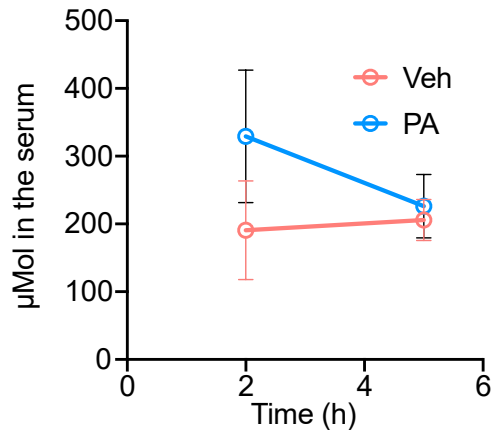**B**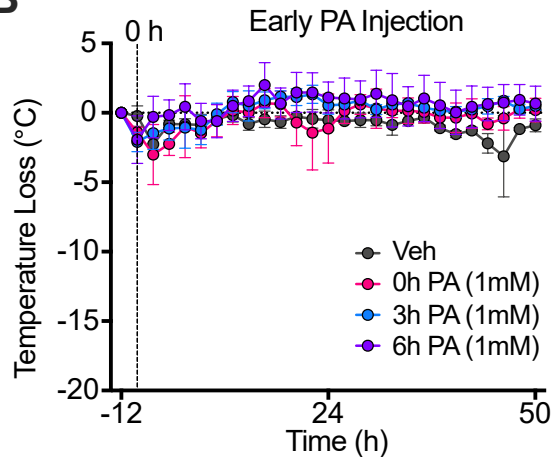**C**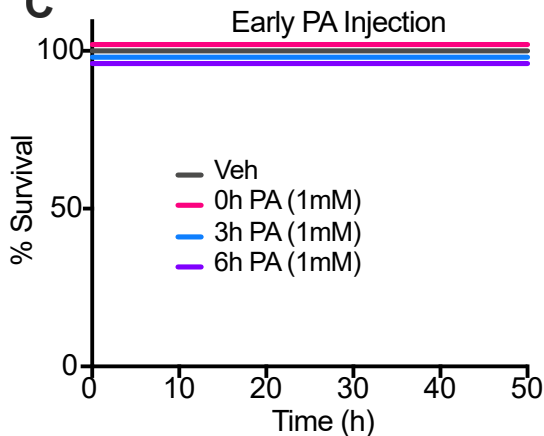**D**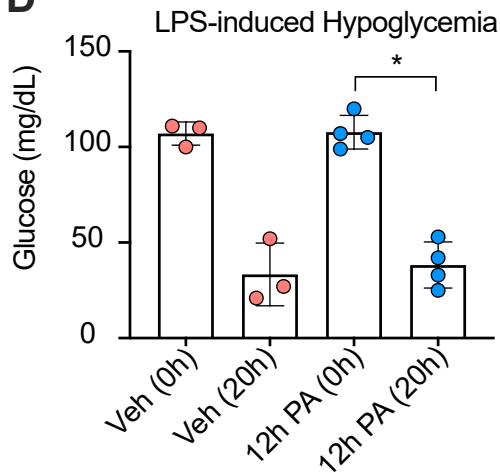

Supplement: supp [file elife_poa_e76744_Figure_4_figure_supplement_1.pdf › elife_poa_e76744_Figure_4_figure_supplement_1.pdf]
